# Supplementary material for: An expanded toolkit for Drosophila gene tagging using synthesized homology donor constructs for CRISPR-mediated homologous recombination
Source: eLife. 2022 Jun 20;11:e76077. doi: 10.7554/eLife.76077 (PMC9239680; doi:10.7554/eLife.76077)
Supplement: Supplementary file 1. — Comparison of the CDS length of the 5787 protein-coding genes with an intron suitable for the T2AGAL4 strategy with the 8144 genes lacking a suitable intron, because the intron is either absent, <100 nt, or is not present in all annotated transcript isoforms. The left column of the table lists categories of CDS size or the number of alleles annotated in FlyBase (classical and transposon insertions). The number of genes in each category is given for genes with introns that are suitable for the T2AGAL4 strategy (middle column) and for genes lacking a suitable intron (right column). These data for the number of annotated alleles and the CDS size are presented in graphical format below the table. [file elife-76077-supp1.xlsx]

## Sheet: comparison
Kanca et al. 2021 Supplementary table 1. Comparison of genes with or without suitable introns for T2AGAL4 strategy
CDS length	Suitable	Not Suitable			Annotated alleles (classic)	Suitable	Not Suitable
<500	412	1986			0	734	4826
500-1000	1118	2472			1-10	3658	2985
1000-2000	2262	2576			11-20	690	216
2000-3000	965	725			21-30	270	49
3000-4000	479	208			31-40	150	25
4000-5000	241	86			41-50	98	17
>=5000	310	91			>50	187	26
avg length	2051	1173			avg number of alleles	10.4	2.1
all genes	5787	8144			all genes	5787	8144
