# Supplementary material for: An expanded toolkit for Drosophila gene tagging using synthesized homology donor constructs for CRISPR-mediated homologous recombination
Source: eLife. 2022 Jun 20;11:e76077. doi: 10.7554/eLife.76077 (PMC9239680; doi:10.7554/eLife.76077)
Supplement: Supplementary file 2. — The genes for which we generated alleles are grouped under headers corresponding to the strategies used to generate the alleles. [file elife-76077-supp2.xlsx]

## Sheet: int200_T2AGAL4
Supplementary Table 2. List of the 428 alleles generated in this study
int200_T2AGAL4 strategy
CR	Gene	Chr.	Donor DNA	FlyBase FBgn
CR02214	Ge-1	2	int200_pM37_p1	FBgn0283682
CR02215	trp	3	int200_pM37_p2	FBgn0003861
CR02222	REPTOR-BP	2	int200_pM37_p0	FBgn0032202
CR02226	hang	X	int200_pM37_p0	FBgn0026575
CR02229	Spt6	X	int200_pM37_p1	FBgn0028982
CR02234	CG4115	3	int200_pM37_p0	FBgn0038017
CR02237	l(2)k05911	2	int200_pM37_p1	FBgn0284244
CR02239	mmd	X	int200_pM37_p1	FBgn0259110
CR02242	CG1371	2	int200_pM37_p1	FBgn0033482
CR02244	Cirl	2	int200_pM37_p2	FBgn0033313
CR02253	yellow-h	4	int200_pM37_p0	FBgn0039896
CR02254	Fatp3	2	int200_pM37_p0	FBgn0034999
CR02257	ey	4	int200_pM37_p1	FBgn0005558
CR02258	nAChRalpha3	X	int200_pM37_p1	FBgn0015519
CR02259	nAChRbeta2	3	int200_pM37_p1	FBgn0004118
CR02260	side-II	2	int200_pM37_p1	FBgn0259213
CR02261	ATPsynβ	4	int200_pM37_p1	FBgn0010217
CR02262	myo	4	int200_pM37_p1	FBgn0026199
CR02267	Tace	3	int200_pM37_p1	FBgn0039734
CR02270	poe	2	int200_pM37_p2	FBgn0011230
CR02279	lectin-46Ca	2	int200_pM37_p0	FBgn0040093
CR02280	He	2	int200_pM37_p0	FBgn0028430
CR02283	TbCMF46	2	int200_pM37_p0	FBgn0032163
CR02284	CG30383	2	int200_pM37_p0	FBgn0050383
CR02285	Adgf-E	2	int200_pM37_p0	FBgn0033952
CR02287	Ns2	2	int200_pM37_p0	FBgn0034243
CR02289	CG44434	2	int200_pM37_p0	FBgn0265626
CR02292	Cyp9h1	2	int200_pM37_p0	FBgn0033775
CR02293	Usp14	2	int200_pM37_p0	FBgn0032216
CR02296	Gr39b	2	int200_pM37_p0	FBgn0041245
CR02298	Cul3	2	int200_pM37_p0	FBgn0261268
CR02303	CG14339	2	int200_pM37_p0	FBgn0031301
CR02304	Ugt36F1	2	int200_pM37_p0	FBgn0027074
CR02306	CG2772	2	int200_pM37_p0	FBgn0031533
CR02308	CG33509	2	int200_pM37_p0	FBgn0053509
CR02309	CG31816	2	int200_pM37_p0	FBgn0051816
CR02310	CG3907	2	int200_pM37_p0	FBgn0034958
CR02311	Wdr59	2	int200_pM37_p0	FBgn0032339
CR02315	rhi	2	int200_pM37_p0	FBgn0004400
CR02316	CG17974	2	int200_pM37_p0	FBgn0034624
CR02319	CG34430	2	int200_pM37_p0	FBgn0085459
CR02327	CG34205	2	int200_pM37_p0	FBgn0085234
CR02329	CG17768	2	int200_pM37_p0	FBgn0032240
CR02336	CG4294	2	int200_pM37_p0	FBgn0034742
CR02341	lok	2	int200_pM37_p0	FBgn0019686
CR02342	CG6220	2	int200_pM37_p0	FBgn0033865
CR02343	ACXE	2	int200_pM37_p0	FBgn0040506
CR02344	CG18480	2	int200_pM37_p0	FBgn0028518
CR02345	cbs	2	int200_pM37_p0	FBgn0086757
CR02346	Obp58b	2	int200_pM37_p0	FBgn0034768
CR02348	Tsp42Eq	2	int200_pM37_p0	FBgn0033138
CR02349	CG15483	2	int200_pM37_p0	FBgn0032457
CR02351	CG18301	2	int200_pM37_p0	FBgn0032265
CR02352	Tsp39D	2	int200_pM37_p0	FBgn0032943
CR02354	CG5096	2	int200_pM37_p0	FBgn0032235
CR02355	rho-5	2	int200_pM37_p0	FBgn0041723
CR02357	CG8407	2	int200_pM37_p0	FBgn0033687
CR02358	CG16974	2	int200_pM37_p0	FBgn0032479
CR02359	Tsp42Ei	2	int200_pM37_p0	FBgn0033130
CR02360	Or49b	2	int200_pM37_p0	FBgn0028963
CR02361	Kdm5	2	int200_pM37_p0	FBgn0031759
CR02362	CG30043	2	int200_pM37_p0	FBgn0050043
CR02363	CG13160	2	int200_pM37_p0	FBgn0033720
CR02365	stil	2	int200_pM37_p0	FBgn0003527
CR02367	l(2)05714	2	int200_pM37_p0	FBgn0010607
CR02368	Rpe	2	int200_pM37_p0	FBgn0050499
CR02369	CG1360	2	int200_pM37_p0	FBgn0033195
CR02370	Incenp	2	int200_pM37_p0	FBgn0260991
CR02371	CG9426	2	int200_pM37_p0	FBgn0032485
CR02374	Gr28a	2	int200_pM37_p0	FBgn0041247
CR02375	Odc2	2	int200_pM37_p0	FBgn0013308
CR02376	dila	2	int200_pM37_p0	FBgn0033447
CR02378	CG8738	2	int200_pM37_p0	FBgn0033321
CR02380	Alp2	2	int200_pM37_p0	FBgn0283480
CR02383	Qsox1	2	int200_pM37_p0	FBgn0033814
CR02385	BicC	2	int200_pM37_p0	FBgn0000182
CR02388	CG4712	2	int200_pM37_p0	FBgn0033818
CR02393	Rab3	2	int200_pM37_p0	FBgn0005586
CR02394	mahj	2	int200_pM37_p0	FBgn0034641
CR02397	DnaJ-H	2	int200_pM37_p0	FBgn0032474
CR02398	Tsp42Er	2	int200_pM37_p0	FBgn0033139
CR02399	Tsp42Eo	2	int200_pM37_p1	FBgn0033136
CR02400	CG7222	2	int200_pM37_p1	FBgn0033551
CR02407	Orcokinin	2	int200_pM37_p1	FBgn0034935
CR02416	CG30087	2	int200_pM37_p1	FBgn0050087
CR02419	Syx6	2	int200_pM37_p1	FBgn0037084
CR02420	l(2)03659	2	int200_pM37_p1	FBgn0010549
CR02424	Idgf6	2	int200_pM37_p1	FBgn0013763
CR02425	CG31706	2	int200_pM37_p1	FBgn0051706
CR02427	emb	2	int200_pM37_p1	FBgn0020497
CR02428	MED15	2	int200_pM37_p1	FBgn0027592
CR02429	CG14401	2	int200_pM37_p1	FBgn0032900
CR02431	CG10764	2	int200_pM37_p1	FBgn0034221
CR02432	cnk	2	int200_pM37_p1	FBgn0286070
CR02433	RhoGAP54D	2	int200_pM37_p1	FBgn0034249
CR02437	CG10621	2	int200_pM37_p1	FBgn0032726
CR02438	Mov10	2	int200_pM37_p1	FBgn0034187
CR02442	CG42697	2	int200_pM37_p1	FBgn0261587
CR02443	CG33296	2	int200_pM37_p1	FBgn0053296
CR02444	spict	2	int200_pM37_p1	FBgn0032451
CR02445	Idgf3	2	int200_pM37_p1	FBgn0020414
CR02446	Sec71	2	int200_pM37_p1	FBgn0028538
CR02448	hoe2	2	int200_pM37_p1	FBgn0031649
CR02450	CG13793	2	int200_pM37_p1	FBgn0031935
CR02451	CG12910	2	int200_pM37_p1	FBgn0033502
CR02453	CG13437	2	int200_pM37_p1	FBgn0034541
CR02454	CG42319	2	int200_pM37_p1	FBgn0259219
CR02458	CG31784	2	int200_pM37_p1	FBgn0051784
CR02459	CG30371	2	int200_pM37_p1	FBgn0050371
CR02462	CG8353	2	int200_pM37_p1	FBgn0032002
CR02464	CG43244	2	int200_pM37_p1	FBgn0262889
CR02467	CG5421	2	int200_pM37_p1	FBgn0032434
CR02468	CG17760	2	int200_pM37_p1	FBgn0033756
CR02470	Ugt36A1	2	int200_pM37_p1	FBgn0015663
CR02475	CG14352	2	int200_pM37_p1	FBgn0031351
CR02476	CG30172	2	int200_pM37_p2	FBgn0050172
CR02477	CG17047	2	int200_pM37_p2	FBgn0033827
CR02479	Myd88	2	int200_pM37_p2	FBgn0033402
CR02480	CG16799	2	int200_pM37_p2	FBgn0034538
CR02481	Pgant3	2	int200_pM37_p2	FBgn0027558
CR02482	CG5867	2	int200_pM37_p2	FBgn0027586
CR02484	sha	2	int200_pM37_p2	FBgn0003382
CR02486	CG3294	2	int200_pM37_p2	FBgn0031628
CR02488	stc	2	int200_pM37_p2	FBgn0001978
CR02490	Zir	2	int200_pM37_p2	FBgn0031216
CR02491	CG9270	2	int200_pM37_p2	FBgn0032908
CR02492	DUBAI	2	int200_pM37_p2	FBgn0033738
CR02493	Pgant1	2	int200_pM37_p2	FBgn0034025
CR02494	Or33b	2	int200_pM37_p2	FBgn0026391
CR02496	Or42a	2	int200_pM37_p2	FBgn0033041
CR02497	Tep1	2	int200_pM37_p2	FBgn0041183
CR02499	CG15153	2	int200_pM37_p2	FBgn0032663
CR02500	CG31741	2	int200_pM37_p2	FBgn0051741
CR02501	Gr33a	2	int200_pM37_p2	FBgn0032416
CR02502	CG18063	2	int200_pM37_p2	FBgn0028856
CR02504	CG15118	2	int200_pM37_p0	FBgn0034418
CR02505	CG9515	2	int200_pM37_p0	FBgn0032077
CR02506	List	2	int200_pM37_p0	FBgn0034381
CR02509	crq	2	int200_pM37_p0	FBgn0015924
CR02510	CG7115	2	int200_pM37_p0	FBgn0027515
CR02511	scat	2	int200_pM37_p0	FBgn0011232
CR02514	NimB1	2	int200_pM37_p0	FBgn0027929
CR02517	SmydA-3	2	int200_pM37_p0	FBgn0262599
CR02520	CG30183	2	int200_pM37_p0	FBgn0050183
CR02521	Vajk2	2	int200_pM37_p0	FBgn0032538
CR02522	CG44836	3	int200_pM37_p0	FBgn0266099
CR02523	Madm	3	int200_pM37_p0	FBgn0027497
CR02529	Dop1R2	3	int200_pM37_p0	FBgn0266137
CR02532	CG12880	3	int200_pM37_p0	FBgn0046258
CR02533	Ppcs	3	int200_pM37_p0	FBgn0261285
CR02534	fau	3	int200_pM37_p0	FBgn0266451
CR02535	Glg1	3	int200_pM37_p0	FBgn0264561
CR02536	CG5768	3	int200_pM37_p0	FBgn0039198
CR02537	CG34377	3	int200_pM37_p0	FBgn0263117
CR02542	dmrt93B	3	int200_pM37_p0	FBgn0038851
CR02543	Arl8	3	int200_pM37_p0	FBgn0037551
CR02544	Ttc26	3	int200_pM37_p0	FBgn0038358
CR02546	CG42327	3	int200_pM37_p0	FBgn0259227
CR02550	CG11791	3	int200_pM37_p0	FBgn0039266
CR02554	CG5196	3	int200_pM37_p0	FBgn0038039
CR02555	CG2182	3	int200_pM37_p0	FBgn0037360
CR02556	Karybeta3	3	int200_pM37_p0	FBgn0087013
CR02559	CG6695	3	int200_pM37_p0	FBgn0039215
CR02560	Ada2b	3	int200_pM37_p0	FBgn0037555
CR02562	Nelf-A	3	int200_pM37_p0	FBgn0038872
CR02565	Spn85F	3	int200_pM37_p0	FBgn0037772
CR02566	Root	3	int200_pM37_p0	FBgn0039152
CR02569	CG15715	3	int200_pM37_p0	FBgn0036538
CR02573	unc-13	4	int200_pM37_p0	FBgn0025726
CR02574	Arl4	4	int200_pM37_p0	FBgn0039889
CR02575	su(f)	X	int200_pM37_p0	FBgn0003559
CR02576	ogre	X	int200_pM37_p0	FBgn0004646
CR02579	CG2556	X	int200_pM37_p0	FBgn0030396
CR02580	CG15765	X	int200_pM37_p0	FBgn0029814
CR02581	CG32547	X	int200_pM37_p0	FBgn0052547
CR02582	br	X	int200_pM37_p0	FBgn0283451
CR02583	CG15211	X	int200_pM37_p0	FBgn0030234
CR02584	CG4928	X	int200_pM37_p0	FBgn0027556
CR02585	IP3K2	X	int200_pM37_p0	FBgn0283680
CR02586	rho-4	X	int200_pM37_p0	FBgn0030318
CR02587	CG9411	X	int200_pM37_p0	FBgn0030569
CR02588	CG1504	X	int200_pM37_p0	FBgn0031100
CR02589	CG43901	X	int200_pM37_p0	FBgn0264502
CR02591	CG32815	X	int200_pM37_p0	FBgn0052815
CR02597	t	X	int200_pM37_p0	FBgn0086367
CR02598	CG42323	X	int200_pM37_p0	FBgn0259223
CR02599	CG14626	X	int200_pM37_p1	FBgn0040360
CR02602	Evi5	X	int200_pM37_p1	FBgn0262740
CR02604	CG14435	X	int200_pM37_p1	FBgn0029911
CR02605	Nup153	X	int200_pM37_p1	FBgn0061200
CR02607	OtopLa	X	int200_pM37_p1	FBgn0259994
CR02608	CG14625	X	int200_pM37_p1	FBgn0040358
CR02609	CG32536	X	int200_pM37_p1	FBgn0052536
CR02612	Ucp4A	X	int200_pM37_p1	FBgn0030872
CR02615	inc	X	int200_pM37_p1	FBgn0025394
CR02616	Kap3	X	int200_pM37_p1	FBgn0028421
CR02617	Ir8a	X	int200_pM37_p1	FBgn0052704
CR02621	par-6	X	int200_pM37_p1	FBgn0026192
CR02624	CG1636	X	int200_pM37_p1	FBgn0030030
CR02631	zf30C	2	int200_pM37_p1	FBgn0270924
CR02633	Ten-m	3	int200_pM37_p1	FBgn0004449
CR02634	nAChRbeta1	3	int200_pM37_p1	FBgn0000038
CR02670	CaMKI	4	int200_pM37_p1	FBgn0016126
CR02671	rdgA	X	int200_pM37_p1	FBgn0261549
CR02672	CG44422	X	int200_pM37_p1	FBgn0265595
CR02673	CG42340	X	int200_pM37_p1	FBgn0259242
CR02676	CG43740	X	int200_pM37_p1	FBgn0263997
CR02677	CG33181	X	int200_pM37_p1	FBgn0053181
CR02679	CG32647	X	int200_pM37_p1	FBgn0052647
CR02680	Hers	X	int200_pM37_p1	FBgn0052529
CR02681	CG1695	X	int200_pM37_p2	FBgn0031116
CR02684	CG42541	X	int200_pM37_p2	FBgn0260658
CR02687	CG2256	X	int200_pM37_p2	FBgn0029995
CR02693	inaF-D	X	int200_pM37_p1	FBgn0260812
CR02694	CG17162	X	int200_pM37_p2	FBgn0039944
CR02697	b6	X	int200_pM37_p0	FBgn0024897
CR02699	Hk	X	int200_pM37_p0	FBgn0263220
CR02701	CG8568	X	int200_pM37_p1	FBgn0030841
CR02702	CG12065	X	int200_pM37_p1	FBgn0030052
CR02705	CG1545	X	int200_pM37_p1	FBgn0030259
CR02707	dmrt11E	X	int200_pM37_p1	FBgn0030477
CR02708	CG1532	X	int200_pM37_p1	FBgn0031143
CR02709	CG7332	X	int200_pM37_p1	FBgn0030973
CR02711	CG13012	X	int200_pM37_p2	FBgn0030769
CR02713	CG4404	X	int200_pM37_p0	FBgn0030432
CR02721	CG8908	2	int200_pM37_p0	FBgn0034493
CR02722	snama	2	int200_pM37_p0	FBgn0086129
CR02723	TwdlE	2	int200_pM37_p0	FBgn0031957
CR02745	hiw	X	int200_pM37_p1	FBgn0030600
CR02779	Slip1	4	int200_pM37_p1	FBgn0024728
CR02793	CG11360	4	int200_pM37_p1	FBgn0039920
CR02798	mAChR-A	2	int200_pM37_p1	FBgn0000037
CR70009	Lip3	3	int200_pM37_p0	FBgn0023495
CR70012	tau	3	int200_pM37_p0	FBgn0266579
CR70028	CtsB	X	int200_pM37_p0	FBgn0030521
CR70032	Ppt1	X	int200_pM37_p2	FBgn0030057
CR70034	Spt6	X	int200_pM37_p1	FBgn0028982
CR70035	Tob	X	int200_pM37_p0	FBgn0028397
CR70041	CG16935	2	int200_pM37_p1	FBgn0033883
CR70044	iPLA2-VIA	3	int200_pM37_p1	FBgn0036053
CR70029	dsb	3	int200_pM37_p2	FBgn0035290
CR70033	prt	3	int200_pM37_p1	FBgn0043005
CR70037	aux	3	int200_pM37_p1	FBgn0037218
CR70036	anne	4	int200_pM37_p1	FBgn0052000
CR70070	lgs	4	int200_pM37_p1	FBgn0039907
CR70074	mim	2	int200_pM37_p0	FBgn0053558
CR70088	Csp	3	int200_pM37_p2	FBgn0004179
CR70089	CDase	3	int200_pM37_p0	FBgn0039774
CR70071	CG3226	X	int200_pM37_p2	FBgn0029882
CR70077	GLS	2	int200_pM37_p2	FBgn0261625
CR70087	CG7236	2	int200_pM37_p2	FBgn0031730
CR70048	Trpγ	2	int200_TGEM_p2	FBgn0032593

## Sheet: int200_KozakGAL4
int200_KozakGAL4 strategy
CR	Gene	Chr.	Donor DNA	FlyBase FBgn
CR70003	CG14044	2	int200_pM37_kG4	FBgn0031650
CR70002	CG15728	X	int200_pM37_kG4	FBgn0030409
CR70005	CG16787	2	int200_pM37_kG4	FBgn0034940
CR70008	CG8027	2	int200_pM37_kG4	FBgn0033392
CR70013	AstC	2	int200_pM37_kG4	FBgn0032336
CR70011	CG16979	3	int200_pM37_kG4	FBgn0036512
CR70014	CG13737	3	int200_pM37_kG4	FBgn0036382
CR70038	CG3376	2	int200_pM37_kG4	FBgn0034997
CR70045	Oli	2	int200_pM37_kG4	FBgn0032651
CR70046	Sk1	X	int200_pM37_kG4	FBgn0030300
CR70043	IntS11	3	int200_pM37_kG4	FBgn0039691
CR70020	βGlu	3	int200_pM37_kG4	FBgn0270927
CR70040	CG8320	2	int200_pM37_kG4	FBgn0034059
CR70022	CG14457	3	int200_pM37_kG4	FBgn0037174
CR70053	Pngl	2	int200_pM37_kG4	FBgn0033050
CR70068	Bap111	X	int200_pM37_kG4	FBgn0030093
CR70069	Bap60	X	int200_pM37_kG4	FBgn0025463
CR70050	Vkor	2	int200_pM37_kG4	FBgn0053544
CR70079	Hip1	3	int200_pM37_kG4	FBgn0036309
CR70080	PIG-A	2	int200_pM37_kG4	FBgn0034270
CR70082	Elo68β	3	int200_pM37_kG4	FBgn0036128
CR70083	CG15744	X	int200_pM37_kG4	FBgn0030466

## Sheet: gRNA_int200_T2AGAL4
gRNA_int200_T2AGAL4 strategy
CR	Gene	Chr.	Donor DNA	FlyBase FBgn
CR70092	ara	3	gRNA_int200_pM37_p0	FBgn0015904
CR70094	lace	2	gRNA_int200_pM37_p0	FBgn0002524
CR70095	Pex23	3	gRNA_int200_pM37_p2	FBgn0288469
CR70096	DIP-λ	2	gRNA_int200_pM37_p0	FBgn0267428
CR70097	fwe	3	gRNA_int200_pM37_p1	FBgn0261722
CR70098	salr	2	gRNA_int200_pM37_p0	FBgn0000287
CR70099	CG15528	3	gRNA_int200_pM37_p2	FBgn0039742
CR70107	dmrt99B	3	gRNA_int200_pM37_p0	FBgn0039683
CR70108	Lsd-2	X	gRNA_int200_pM37_p1	FBgn0030608
CR70110	SREBP	3	gRNA_int200_pM37_p0	FBgn0261283
CR70114	RhoGAP68F	3	gRNA_int200_pM37_p1	FBgn0036257
CR70115	ifc	2	gRNA_int200_pM37_p2	FBgn0001941
CR70118	KrT95D	3	gRNA_int200_pM37_p0	FBgn0020647
CR70121	Mfe2	X	gRNA_int200_pM37_p1	FBgn0030731
CR70122	Vps13	2	gRNA_int200_pM37_p1	FBgn0033194
CR70125	Mov10	2	gRNA_int200_pM37_p1	FBgn0034187
CR70127	CG33090	2	gRNA_int200_pM37_p2	FBgn0028916
CR70133	ec	X	gRNA_int200_pM37_p0	FBgn0000542
CR70135	srl	3	gRNA_int200_pM37_p2	FBgn0037248
CR70136	Root	3	gRNA_int200_pM37_p0	FBgn0039152
CR70137	Su(z)12	3	gRNA_int200_pM37_p0	FBgn0020887
CR70140	cnn	2	gRNA_int200_pM37_p1	FBgn0013765
CR70144	Adk2	3	gRNA_int200_pM37_p0	FBgn0036337
CR70145	CG8199	3	gRNA_int200_pM37_p2	FBgn0037709
CR70149	CG5044	3	gRNA_int200_pM37_p0	FBgn0038326
CR70150	subdued	2	gRNA_int200_pM37_p0	FBgn0038721
CR70151	Tusp	3	gRNA_int200_pM37_p0	FBgn0039530
CR70152	FarO	X	gRNA_int200_pM37_p2	FBgn0023550
CR70157	CG14736	3	gRNA_int200_pM37_p1	FBgn0037986
CR70162	CG4612	2	gRNA_int200_pM37_p0	FBgn0035016
CR70165	PolA1	3	gRNA_int200_pM37_p1	FBgn0259113
CR70166	mav	4	gRNA_int200_pM37_p0	FBgn0039914
CR70167	rhea	3	gRNA_int200_pM37_p0	FBgn0260442
CR70168	PK2-R1	3	gRNA_int200_pM37_p2	FBgn0038140
CR70173	LKRSDH	2	gRNA_int200_pM37_p0	FBgn0286198
CR70174	eIF2A	3	gRNA_int200_pM37_p1	FBgn0037135
CR70177	CG12268	3	gRNA_int200_pM37_p0	FBgn0039131
CR70178	UQCR-C1	3	gRNA_int200_pM37_p0	FBgn0038271
CR70179	wal	2	gRNA_int200_pM37_p0	FBgn0010516
CR70187	Acsf3	X	gRNA_int200_pM37_p1	FBgn0029945
CR70188	CG33253	X	gRNA_int200_pM37_p1	FBgn0030992
CR70189	Grasp65	3	gRNA_int200_pM37_p1	FBgn0036919
CR70190	IntS11	3	gRNA_int200_pM37_p1	FBgn0039691
CR70191	Mrtf	3	gRNA_int200_pM37_p1	FBgn0052296
CR70192	pAbp	2	gRNA_int200_pM37_p1	FBgn0265297
CR70196	rin	3	gRNA_int200_pM37_p1	FBgn0015778
CR70197	wat	3	gRNA_int200_pM37_p1	FBgn0039620
CR70199	Dbct	X	gRNA_int200_pM37_p0	FBgn0030612
CR70200	CG17168	X	gRNA_int200_pM37_p2	FBgn0039943
CR70201	Edem2	2	gRNA_int200_pM37_p2	FBgn0032480
CR70202	GM130	2	gRNA_int200_pM37_p0	FBgn0034697
CR70205	nocte	X	gRNA_int200_pM37_p0	FBgn0261710
CR70207	Pex1	3	gRNA_int200_pM37_p0	FBgn0013563
CR70208	Prx6005	2	gRNA_int200_pM37_p2	FBgn0031479
CR70209	Rlip	3	gRNA_int200_pM37_p2	FBgn0026056
CR70210	Roe1	2	gRNA_int200_pM37_p0	FBgn0014877
CR70212	Vha68-2	2	gRNA_int200_pM37_p0	FBgn0263598
CR70213	Sp1	X	gRNA_int200_pM37_p2	FBgn0020378
CR70216	br	X	gRNA_int200_pM37_p0	FBgn0283451
CR70218	Axn	3	gRNA_int200_pM37_p2	FBgn0026597
CR70219	LpR1	3	gRNA_int200_pM37_p0	FBgn0066101
CR70220	LpR2	3	gRNA_int200_pM37_p0	FBgn0051092
CR70225	Osi2	3	gRNA_int200_pM37_p2	FBgn0037410
CR70227	wap	X	gRNA_int200_pM37_p2	FBgn0266848
CR70229	Larp4B	3	gRNA_int200_pM37_p0	FBgn0035424
CR70231	DIP-β	X	gRNA_int200_pM37_p1	FBgn0259245
CR70233	cac	X	gRNA_int200_pM37_p1	FBgn0263111
CR70241	sp3	3	gRNA_int200_pM37_p1	FBgn0038890
CR70242	lola	2	gRNA_int200_pM37_p1	FBgn0283521
CR70243	sli	2	gRNA_int200_pM37_p1	FBgn0264089
CR70244	Dl	3	gRNA_int200_pM37_p0	FBgn0000463
CR70246	Csp	3	gRNA_int200_pM37_p0	FBgn0004179
CR70249	MFS10	X	gRNA_int200_pM37_p1	FBgn0030452
CR70251	eIF4B	3	gRNA_int200_pM37_p1	FBgn0020660
CR70256	Pis	X	gRNA_int200_pM37_p1	FBgn0030670
CR70258	Rpt3	X	gRNA_int200_pM37_p0	FBgn0028686
CR70260	CG10907	3	gRNA_int200_pM37_p2	FBgn0036207
CR70261	Tdc2	2	gRNA_int200_pM37_p2	FBgn0050446
CR70263	Gdap1	3	gRNA_int200_pM37_p0	FBgn0035587
CR70265	Golgin245	2	gRNA_int200_pM37_p0	FBgn0034854
CR70266	ThrRS	2	gRNA_int200_pM37_p1	FBgn0027081
CR70268	CG10137	2	gRNA_int200_pM37_p2	FBgn0032800
CR70269	CG17739	2	gRNA_int200_pM37_p1	FBgn0033710
CR70281	CrebA	3	gRNA_int200_pM37_p0	FBgn0004396
CR70282	gl	3	gRNA_int200_pM37_p0	FBgn0004618
CR70284	ND-49	4	gRNA_int200_pM37_p1	FBgn0039909
CR70287	kis	2	gRNA_int200_pM37_p0	FBgn0266557
CR70289	erm	2	gRNA_int200_pM37_p0	FBgn0031375
CR70296	Yif1	3	gRNA_int200_pM37_p1	FBgn0288631
CR70298	RhoGAP100F	3	gRNA_int200_pM37_p1	FBgn0039883
CR70299	Gsc	2	gRNA_int200_pM37_p0	FBgn0010323
CR70312	CG7744	2	gRNA_int200_pM37_p2	FBgn0034447
CR70314	Itgbn	2	gRNA_int200_pM37_p1	FBgn0010395
CR70324	Tim10	2	gRNA_int200_pM37_p1	FBgn0027360
CR70329	stai	2	gRNA_int200_pM37_p1	FBgn0266521

## Sheet: 2XgRNA_int200_KozakGAL4
2XgRNA_int200_KozakGAL4 strategy
CR	Gene	Chr.	Donor DNA	FlyBase FBgn
CR70091	CG7423	X	2XgRNA_int200_pM37_kG4	FBgn0030982
CR70093	Setx	3	2XgRNA_int200_pM37_kG4	FBgn0035842
CR70104	CG14795	X	2XgRNA_int200_pM37_kG4	FBgn0025393
CR70106	CG33310	2	2XgRNA_int200_pM37_kG4	FBgn0053310
CR70109	PHGPx	3	2XgRNA_int200_pM37_kG4	FBgn0035438
CR70111	Wdr37	3	2XgRNA_int200_pM37_kG4	FBgn0038617
CR70112	ZnT49B	2	2XgRNA_int200_pM37_kG4	FBgn0033762
CR70116	CG14644	3	2XgRNA_int200_pM37_kG4	FBgn0250821
CR70119	CG10947	2	2XgRNA_int200_pM37_kG4	FBgn0032857
CR70120	Usp7	X	2XgRNA_int200_pM37_kG4	FBgn0030366
CR70124	Vps13B	3	2XgRNA_int200_pM37_kG4	FBgn0039727
CR70130	mAChR-C	X	2XgRNA_int200_pM37_kG4	FBgn0029909
CR70131	CG34293	3	2XgRNA_int200_pM37_kG4	FBgn0085322
CR70139	wfs1	3	2XgRNA_int200_pM37_kG4	FBgn0039003
CR70142	Ctl2	3	2XgRNA_int200_pM37_kG4	FBgn0039637
CR70143	CG8778	2	2XgRNA_int200_pM37_kG4	FBgn0033761
CR70146	GlcT	2	2XgRNA_int200_pM37_kG4	FBgn0067102
CR70147	amrt	X	2XgRNA_int200_pM37_kG4	FBgn0030522
CR70148	CG30022	2	2XgRNA_int200_pM37_kG4	FBgn0050022
CR70153	Ufm1	2	2XgRNA_int200_pM37_kG4	FBgn0085220
CR70154	CG8646	2	2XgRNA_int200_pM37_kG4	FBgn0033763
CR70155	Cln3	3	2XgRNA_int200_pM37_kG4	FBgn0036756
CR70156	CG10104	2	2XgRNA_int200_pM37_kG4	FBgn0033933
CR70160	CG3770	2	2XgRNA_int200_pM37_kG4	FBgn0035085
CR70169	rhea	3	2XgRNA_int200_pM37_kG4	FBgn0260442
CR70176	Loxl2	2	2XgRNA_int200_pM37_kG4	FBgn0034660
CR70181	CG2124	X	2XgRNA_int200_pM37_kG4	FBgn0030217
CR70182	CG4074	3	2XgRNA_int200_pM37_kG4	FBgn0037017
CR70183	CG6638	3	2XgRNA_int200_pM37_kG4	FBgn0035911
CR70184	CG8202	3	2XgRNA_int200_pM37_kG4	FBgn0037622
CR70185	CG9184	3	2XgRNA_int200_pM37_kG4	FBgn0035208
CR70186	CG15093	2	2XgRNA_int200_pM37_kG4	FBgn0034390
CR70193	Pex2	3	2XgRNA_int200_pM37_kG4	FBgn0035876
CR70194	Pex16	3	2XgRNA_int200_pM37_kG4	FBgn0037019
CR70215	ash1	3	2XgRNA_int200_pM37_kG4	FBgn0005386
CR70221	Snx17	2	2XgRNA_int200_pM37_kG4	FBgn0032191
CR70222	Vps29	2	2XgRNA_int200_pM37_kG4	FBgn0031310
CR70223	AP-2σ	3	2XgRNA_int200_pM37_kG4	FBgn0043012
CR70226	CG7943	3	2XgRNA_int200_pM37_kG4	FBgn0039741
CR70237	Fitm	3	2XgRNA_int200_pM37_kG4	FBgn0035586
CR70238	armi	3	2XgRNA_int200_pM37_kG4	FBgn0041164
CR70245	CG5254	X	2XgRNA_int200_pM37_kG4	FBgn0040383
CR70247	Pka-C1	2	2XgRNA_int200_pM37_kG4	FBgn0000273
CR70248	Ufc1	2	2XgRNA_int200_pM37_kG4	FBgn0034061
CR70252	mtm	2	2XgRNA_int200_pM37_kG4	FBgn0025742
CR70262	t-Grip84	3	2XgRNA_int200_pM37_kG4	FBgn0035800
CR70264	mib1	3	2XgRNA_int200_pM37_kG4	FBgn0263601
CR70267	shop	X	2XgRNA_int200_pM37_kG4	FBgn0030966
CR70270	GLS	2	2XgRNA_int200_pM37_kG4	FBgn0261625
CR70271	CG13051	3	2XgRNA_int200_pM37_kG4	FBgn0040799
CR70272	CG32191	3	2XgRNA_int200_pM37_kG4	FBgn0052191
CR70273	Arc2	2	2XgRNA_int200_pM37_kG4	FBgn0033928
CR70274	SoxN	2	2XgRNA_int200_pM37_kG4	FBgn0029123
CR70276	CG10324	3	2XgRNA_int200_pM37_kG4	FBgn0038454
CR70278	CG34247	3	2XgRNA_int200_pM37_kG4	FBgn0085276
CR70279	whip	2	2XgRNA_int200_pM37_kG4	FBgn0250827
CR70280	CG7402	3	2XgRNA_int200_pM37_kG4	FBgn0036768
CR70283	Qsox2	3	2XgRNA_int200_pM37_kG4	FBgn0038919
CR70290	CG10073	2	2XgRNA_int200_pM37_kG4	FBgn0034440
