# Supplementary material for: An expanded toolkit for Drosophila gene tagging using synthesized homology donor constructs for CRISPR-mediated homologous recombination
Source: eLife. 2022 Jun 20;11:e76077. doi: 10.7554/eLife.76077 (PMC9239680; doi:10.7554/eLife.76077)
Supplement: Supplementary file 4. — Sequences of the primers used for PCR verification of alleles and generation of GFP knock-in donor constructs. [file elife-76077-supp4.xlsx]

## Sheet: Sheet1
Kanca et al. 2021 Supplementary file 2 Primer sequences
Primers for PCR verification of CRIMIC and KozakGAL4 alleles
KozakGAL4_L_R	ACTCCCAGTTGTTCTTCAGGCACTTGGC
KozakGAL4_R_F	GAAAGTATAGGAACTTCTCGCGCTCG
CRIMIC_ch_rev	GCGGAAGAGAGATAAATCGGTTG
CRIMIC_ch_for	GTGGTATGGCTGATTATGATCAGAAG
Primers to clone WDR37 Knock-in alleles
C-Term
dsRed_CTerm_F	AGGCGCAGCTCTGCGAAATCTTAACCCTAGAAAGATAATCATATTGTGACGTACGTTAAAGATAATCATG
scDsRed_R	TGTGGGCATCGCTTTGGGGATGCTTCTTTGTTCGAGAGATTTAACCCTAGAAAGATAGTCTGCGTAAAATTGAC
sfGFP_Cterm_F	TCGTTCTTCCGAAGGACAATGTGGGAGGTTCCGGTGGAAG
sfGFP_CTerm_R	CTCCGCTTCAGTTGCCTTCACTTGTACAGCTCATCCATGCCCAGGGT
wdr37_3F_CTerm_F	GCATGGATGAGCTGTACAAGTGAAGGCAACTGAAGCGGAG
wdr37_3F_R	GATTATCTTTCTAGGGTTAAGATTTCGCAGAGCTGCGC
wdr37_5F_CTerm_R	CTTCCACCGGAACCTCCCACATTGTCCTTCGGAAGAACGATGG
wdr37_5F_F	GCGAGTCTGCAACCCCTGAACACTAATTGGATTCCCCCGGGCTCTGCCCACC
internal
sfGFP_int_F	GCATGATTTTCAGGAAGGGCGTGGGAGGTTCCGGTGGAAG
sfGFP_int_R	AGTTCCTCCTCTGAAGAATGCTCGCCGGAACCTCCG
wdr37_3F_int_F	GAAGCGGAGGTTCCGGCGAGCATTCTTCAGAGGAGGAACTGGACG
wdr37_5F_int_R	CTTCCACCGGAACCTCCCACGCCCTTCCTGAAAATCATGCAACG
N-Term
sfGFP_Nterm_F	GAGGCGAAAAGAAAAGCATGGTGTCCAAGGGCGAG
sfGFP_Nterm_R	GCCCGTGTCTTGCTAGCCTTCTCGCCGGAACCTCCG
wdr37_3F_NTerm_F	GAAGCGGAGGTTCCGGCGAGAAGGCTAGCAAGACACGGGCT
wdr37_5F_Nterm_R	AGCTCCTCGCCCTTGGACACCATGCTTTTCTTTTCGCCTCTTTGT
