# Supplementary material for: An expanded toolkit for Drosophila gene tagging using synthesized homology donor constructs for CRISPR-mediated homologous recombination
Source: eLife. 2022 Jun 20;11:e76077. doi: 10.7554/eLife.76077 (PMC9239680; doi:10.7554/eLife.76077)
Supplement: Supplementary file 5. — Sequences of the probes used in smiFISH experiment. [file elife-76077-supp5.xlsx]

## Sheet: Sheet1
GAL4
		CCTCCTAAGTTTCGAGCTGGACTCAGTG	ttcttcaggcggcagatatc	CCTCCTAAGTTTCGAGCTGGACTCAGTGttcttcaggcggcagatatc	34	0.5
		CCTCCTAAGTTTCGAGCTGGACTCAGTG	agttgttcttcaggcacttg	CCTCCTAAGTTTCGAGCTGGACTCAGTGagttgttcttcaggcacttg	87	0.45
		CCTCCTAAGTTTCGAGCTGGACTCAGTG	ggaagatcagcaggaacagc	CCTCCTAAGTTTCGAGCTGGACTCAGTGggaagatcagcaggaacagc	198	0.55
		CCTCCTAAGTTTCGAGCTGGACTCAGTG	tcttcaggatcatatccaga	CCTCCTAAGTTTCGAGCTGGACTCAGTGtcttcaggatcatatccaga	228	0.4
		CCTCCTAAGTTTCGAGCTGGACTCAGTG	ttgatatcctgcaggctatc	CCTCCTAAGTTTCGAGCTGGACTCAGTGttgatatcctgcaggctatc	250	0.45
		CCTCCTAAGTTTCGAGCTGGACTCAGTG	acgttatcctgcacgaacag	CCTCCTAAGTTTCGAGCTGGACTCAGTGacgttatcctgcacgaacag	286	0.5
		CCTCCTAAGTTTCGAGCTGGACTCAGTG	ctatcgatgctcacggtcag	CCTCCTAAGTTTCGAGCTGGACTCAGTGctatcgatgctcacggtcag	430	0.55
		CCTCCTAAGTTTCGAGCTGGACTCAGTG	catgaaatccagggggatgg	CCTCCTAAGTTTCGAGCTGGACTCAGTGcatgaaatccagggggatgg	473	0.55
		CCTCCTAAGTTTCGAGCTGGACTCAGTG	atcggttttcaggaagggca	CCTCCTAAGTTTCGAGCTGGACTCAGTGatcggttttcaggaagggca	551	0.5
		CCTCCTAAGTTTCGAGCTGGACTCAGTG	cgaagaagccgttgttgttg	CCTCCTAAGTTTCGAGCTGGACTCAGTGcgaagaagccgttgttgttg	573	0.5
		CCTCCTAAGTTTCGAGCTGGACTCAGTG	tgtagttctcgggcttgaag	CCTCCTAAGTTTCGAGCTGGACTCAGTGtgtagttctcgggcttgaag	630	0.5
		CCTCCTAAGTTTCGAGCTGGACTCAGTG	tgtagcgatcggtgatcatg	CCTCCTAAGTTTCGAGCTGGACTCAGTGtgtagcgatcggtgatcatg	678	0.5
		CCTCCTAAGTTTCGAGCTGGACTCAGTG	aagttgttcaggtagctctg	CCTCCTAAGTTTCGAGCTGGACTCAGTGaagttgttcaggtagctctg	733	0.45
		CCTCCTAAGTTTCGAGCTGGACTCAGTG	gttgttgtacagcatcatca	CCTCCTAAGTTTCGAGCTGGACTCAGTGgttgttgtacagcatcatca	788	0.4
		CCTCCTAAGTTTCGAGCTGGACTCAGTG	caggatgcagttgaacagga	CCTCCTAAGTTTCGAGCTGGACTCAGTGcaggatgcagttgaacagga	842	0.5
		CCTCCTAAGTTTCGAGCTGGACTCAGTG	catcgatatcggtgctctcg	CCTCCTAAGTTTCGAGCTGGACTCAGTGcatcgatatcggtgctctcg	888	0.55
		CCTCCTAAGTTTCGAGCTGGACTCAGTG	ttggcgttctggtagtagaa	CCTCCTAAGTTTCGAGCTGGACTCAGTGttggcgttctggtagtagaa	910	0.45
		CCTCCTAAGTTTCGAGCTGGACTCAGTG	tcgaacaccttgctggtcag	CCTCCTAAGTTTCGAGCTGGACTCAGTGtcgaacaccttgctggtcag	937	0.55
		CCTCCTAAGTTTCGAGCTGGACTCAGTG	tagctggtgttggtcttttg	CCTCCTAAGTTTCGAGCTGGACTCAGTGtagctggtgttggtcttttg	1018	0.45
		CCTCCTAAGTTTCGAGCTGGACTCAGTG	gatgctgaagctgtggaagt	CCTCCTAAGTTTCGAGCTGGACTCAGTGgatgctgaagctgtggaagt	1040	0.5
		CCTCCTAAGTTTCGAGCTGGACTCAGTG	ggatgctgctatcgctgaag	CCTCCTAAGTTTCGAGCTGGACTCAGTGggatgctgctatcgctgaag	1104	0.55
		CCTCCTAAGTTTCGAGCTGGACTCAGTG	ggaagctgatggtgttctgg	CCTCCTAAGTTTCGAGCTGGACTCAGTGggaagctgatggtgttctgg	1209	0.55
		CCTCCTAAGTTTCGAGCTGGACTCAGTG	cgatgatgccgtggtagatg	CCTCCTAAGTTTCGAGCTGGACTCAGTGcgatgatgccgtggtagatg	1272	0.55
		CCTCCTAAGTTTCGAGCTGGACTCAGTG	cgtagatcttggtgaacacc	CCTCCTAAGTTTCGAGCTGGACTCAGTGcgtagatcttggtgaacacc	1311	0.5
		CCTCCTAAGTTTCGAGCTGGACTCAGTG	atctcgttgcagatcatcag	CCTCCTAAGTTTCGAGCTGGACTCAGTGatctcgttgcagatcatcag	1384	0.45
		CCTCCTAAGTTTCGAGCTGGACTCAGTG	tatccatctgcaggaacttg	CCTCCTAAGTTTCGAGCTGGACTCAGTGtatccatctgcaggaacttg	1428	0.45
		CCTCCTAAGTTTCGAGCTGGACTCAGTG	tcgaagcgggtgaagctcag	CCTCCTAAGTTTCGAGCTGGACTCAGTGtcgaagcgggtgaagctcag	1492	0.6
		CCTCCTAAGTTTCGAGCTGGACTCAGTG	aagaaatcgcgcagcacgta	CCTCCTAAGTTTCGAGCTGGACTCAGTGaagaaatcgcgcagcacgta	1543	0.5
		CCTCCTAAGTTTCGAGCTGGACTCAGTG	tcttcttctgggtgaagttg	CCTCCTAAGTTTCGAGCTGGACTCAGTGtcttcttctgggtgaagttg	1566	0.45
		CCTCCTAAGTTTCGAGCTGGACTCAGTG	ctctggtgatcgttctgatc	CCTCCTAAGTTTCGAGCTGGACTCAGTGctctggtgatcgttctgatc	1600	0.5
		CCTCCTAAGTTTCGAGCTGGACTCAGTG	catcgctcagcatgatgctg	CCTCCTAAGTTTCGAGCTGGACTCAGTGcatcgctcagcatgatgctg	1638	0.55
		CCTCCTAAGTTTCGAGCTGGACTCAGTG	ttatccatgtagctgctcac	CCTCCTAAGTTTCGAGCTGGACTCAGTGttatccatgtagctgctcac	1681	0.45
		CCTCCTAAGTTTCGAGCTGGACTCAGTG	cgaagtagggggtcacgttg	CCTCCTAAGTTTCGAGCTGGACTCAGTGcgaagtagggggtcacgttg	1704	0.6
		CCTCCTAAGTTTCGAGCTGGACTCAGTG	tgaacaggtagtagctgcag	CCTCCTAAGTTTCGAGCTGGACTCAGTGtgaacaggtagtagctgcag	1731	0.5
		CCTCCTAAGTTTCGAGCTGGACTCAGTG	atcagcacggtgttgatctg	CCTCCTAAGTTTCGAGCTGGACTCAGTGatcagcacggtgttgatctg	1834	0.5
		CCTCCTAAGTTTCGAGCTGGACTCAGTG	aggtctggatcttgaaggtg	CCTCCTAAGTTTCGAGCTGGACTCAGTGaggtctggatcttgaaggtg	1872	0.5
		CCTCCTAAGTTTCGAGCTGGACTCAGTG	agcacctggatgtacttctc	CCTCCTAAGTTTCGAGCTGGACTCAGTGagcacctggatgtacttctc	1894	0.5
		CCTCCTAAGTTTCGAGCTGGACTCAGTG	ctgttgttgtagctgatgtg	CCTCCTAAGTTTCGAGCTGGACTCAGTGctgttgttgtagctgatgtg	1966	0.45
		CCTCCTAAGTTTCGAGCTGGACTCAGTG	cacgatgttcttgatggcgc	CCTCCTAAGTTTCGAGCTGGACTCAGTGcacgatgttcttgatggcgc	1994	0.55
		CCTCCTAAGTTTCGAGCTGGACTCAGTG	tacttcacgctgatgttgtt	CCTCCTAAGTTTCGAGCTGGACTCAGTGtacttcacgctgatgttgtt	2062	0.4
		CCTCCTAAGTTTCGAGCTGGACTCAGTG	tcaccagatcgctgaagctg	CCTCCTAAGTTTCGAGCTGGACTCAGTGtcaccagatcgctgaagctg	2133	0.55
		CCTCCTAAGTTTCGAGCTGGACTCAGTG	tgttggtgaaggtgaagctc	CCTCCTAAGTTTCGAGCTGGACTCAGTGtgttggtgaaggtgaagctc	2343	0.5
		CCTCCTAAGTTTCGAGCTGGACTCAGTG	tctgggtggtgatcaggttg	CCTCCTAAGTTTCGAGCTGGACTCAGTGtctgggtggtgatcaggttg	2376	0.55
		CCTCCTAAGTTTCGAGCTGGACTCAGTG	catgaagttatcgtgcacgt	CCTCCTAAGTTTCGAGCTGGACTCAGTGcatgaagttatcgtgcacgt	2435	0.45
		CCTCCTAAGTTTCGAGCTGGACTCAGTG	tgttgccatcatcgatcttg	CCTCCTAAGTTTCGAGCTGGACTCAGTGtgttgccatcatcgatcttg	2475	0.45
		CCTCCTAAGTTTCGAGCTGGACTCAGTG	tgaacatgccggtggtgatg	CCTCCTAAGTTTCGAGCTGGACTCAGTGtgaacatgccggtggtgatg	2550	0.55
		CCTCCTAAGTTTCGAGCTGGACTCAGTG	tgtacacatcatccatggtg	CCTCCTAAGTTTCGAGCTGGACTCAGTGtgtacacatcatccatggtg	2577	0.45
		CCTCCTAAGTTTCGAGCTGGACTCAGTG	ggtatcctcatcatcgaaca	CCTCCTAAGTTTCGAGCTGGACTCAGTGggtatcctcatcatcgaaca	2603	0.45
Setx (CG7504)
		CCTCCTAAGTTTCGAGCTGGACTCAGTG	cgaaggtgttctggtattca	CCTCCTAAGTTTCGAGCTGGACTCAGTGcgaaggtgttctggtattca	39	0.45
		CCTCCTAAGTTTCGAGCTGGACTCAGTG	aagattatcctgcaacgcga	CCTCCTAAGTTTCGAGCTGGACTCAGTGaagattatcctgcaacgcga	313	0.45
		CCTCCTAAGTTTCGAGCTGGACTCAGTG	ctcacgatgatattggcgtg	CCTCCTAAGTTTCGAGCTGGACTCAGTGctcacgatgatattggcgtg	364	0.5
		CCTCCTAAGTTTCGAGCTGGACTCAGTG	cgtcggacgacagaacgatt	CCTCCTAAGTTTCGAGCTGGACTCAGTGcgtcggacgacagaacgatt	585	0.55
		CCTCCTAAGTTTCGAGCTGGACTCAGTG	ttcagattgaactcggtggg	CCTCCTAAGTTTCGAGCTGGACTCAGTGttcagattgaactcggtggg	655	0.5
		CCTCCTAAGTTTCGAGCTGGACTCAGTG	cggaggtatgctttacgatt	CCTCCTAAGTTTCGAGCTGGACTCAGTGcggaggtatgctttacgatt	783	0.45
		CCTCCTAAGTTTCGAGCTGGACTCAGTG	atggagaaccttcaggcaag	CCTCCTAAGTTTCGAGCTGGACTCAGTGatggagaaccttcaggcaag	1149	0.5
		CCTCCTAAGTTTCGAGCTGGACTCAGTG	aggtctgcgacatttctatg	CCTCCTAAGTTTCGAGCTGGACTCAGTGaggtctgcgacatttctatg	1281	0.45
		CCTCCTAAGTTTCGAGCTGGACTCAGTG	ctttgtgttcattctctagc	CCTCCTAAGTTTCGAGCTGGACTCAGTGctttgtgttcattctctagc	1305	0.4
		CCTCCTAAGTTTCGAGCTGGACTCAGTG	tcggtttttttgctccaata	CCTCCTAAGTTTCGAGCTGGACTCAGTGtcggtttttttgctccaata	1344	0.35
		CCTCCTAAGTTTCGAGCTGGACTCAGTG	ggagatttcgatttggagcg	CCTCCTAAGTTTCGAGCTGGACTCAGTGggagatttcgatttggagcg	1447	0.5
		CCTCCTAAGTTTCGAGCTGGACTCAGTG	atctactgatgtcttggtcg	CCTCCTAAGTTTCGAGCTGGACTCAGTGatctactgatgtcttggtcg	1610	0.45
		CCTCCTAAGTTTCGAGCTGGACTCAGTG	ttgagcaacttttggtttcc	CCTCCTAAGTTTCGAGCTGGACTCAGTGttgagcaacttttggtttcc	1647	0.4
		CCTCCTAAGTTTCGAGCTGGACTCAGTG	ttcgggatgcaactatttgc	CCTCCTAAGTTTCGAGCTGGACTCAGTGttcgggatgcaactatttgc	1680	0.45
		CCTCCTAAGTTTCGAGCTGGACTCAGTG	gcggacagatattagttggt	CCTCCTAAGTTTCGAGCTGGACTCAGTGgcggacagatattagttggt	1704	0.45
		CCTCCTAAGTTTCGAGCTGGACTCAGTG	tacgaatcgcttacgggttg	CCTCCTAAGTTTCGAGCTGGACTCAGTGtacgaatcgcttacgggttg	1748	0.5
		CCTCCTAAGTTTCGAGCTGGACTCAGTG	gttactatcagttcttcctt	CCTCCTAAGTTTCGAGCTGGACTCAGTGgttactatcagttcttcctt	1966	0.35
		CCTCCTAAGTTTCGAGCTGGACTCAGTG	gatcttatttcatcacggct	CCTCCTAAGTTTCGAGCTGGACTCAGTGgatcttatttcatcacggct	2086	0.4
		CCTCCTAAGTTTCGAGCTGGACTCAGTG	cgattttgatcggttgagca	CCTCCTAAGTTTCGAGCTGGACTCAGTGcgattttgatcggttgagca	2210	0.45
		CCTCCTAAGTTTCGAGCTGGACTCAGTG	cgatttttgggcaaggatgg	CCTCCTAAGTTTCGAGCTGGACTCAGTGcgatttttgggcaaggatgg	2380	0.5
		CCTCCTAAGTTTCGAGCTGGACTCAGTG	tctttaactttcacctcagc	CCTCCTAAGTTTCGAGCTGGACTCAGTGtctttaactttcacctcagc	2422	0.4
		CCTCCTAAGTTTCGAGCTGGACTCAGTG	tgaacggtgggaacacttgt	CCTCCTAAGTTTCGAGCTGGACTCAGTGtgaacggtgggaacacttgt	2632	0.5
		CCTCCTAAGTTTCGAGCTGGACTCAGTG	aaaaatccgccacgattggt	CCTCCTAAGTTTCGAGCTGGACTCAGTGaaaaatccgccacgattggt	2656	0.45
		CCTCCTAAGTTTCGAGCTGGACTCAGTG	gtttgggaactggtttcttt	CCTCCTAAGTTTCGAGCTGGACTCAGTGgtttgggaactggtttcttt	2739	0.4
		CCTCCTAAGTTTCGAGCTGGACTCAGTG	actttgttacaagtgcgctg	CCTCCTAAGTTTCGAGCTGGACTCAGTGactttgttacaagtgcgctg	2878	0.45
		CCTCCTAAGTTTCGAGCTGGACTCAGTG	tttgagtcttcggctttttg	CCTCCTAAGTTTCGAGCTGGACTCAGTGtttgagtcttcggctttttg	2926	0.4
		CCTCCTAAGTTTCGAGCTGGACTCAGTG	cttaaccctttcgatacagt	CCTCCTAAGTTTCGAGCTGGACTCAGTGcttaaccctttcgatacagt	2999	0.4
		CCTCCTAAGTTTCGAGCTGGACTCAGTG	gtatgtcgttcactggttta	CCTCCTAAGTTTCGAGCTGGACTCAGTGgtatgtcgttcactggttta	3111	0.4
		CCTCCTAAGTTTCGAGCTGGACTCAGTG	ctttaggatactccgagagt	CCTCCTAAGTTTCGAGCTGGACTCAGTGctttaggatactccgagagt	3137	0.45
		CCTCCTAAGTTTCGAGCTGGACTCAGTG	tttcgatggtggaaagcagc	CCTCCTAAGTTTCGAGCTGGACTCAGTGtttcgatggtggaaagcagc	3288	0.5
		CCTCCTAAGTTTCGAGCTGGACTCAGTG	gtttgctattgactctggta	CCTCCTAAGTTTCGAGCTGGACTCAGTGgtttgctattgactctggta	3390	0.4
		CCTCCTAAGTTTCGAGCTGGACTCAGTG	cttttagcatgccacaacag	CCTCCTAAGTTTCGAGCTGGACTCAGTGcttttagcatgccacaacag	3441	0.45
		CCTCCTAAGTTTCGAGCTGGACTCAGTG	gctccaacagattggcaaag	CCTCCTAAGTTTCGAGCTGGACTCAGTGgctccaacagattggcaaag	3465	0.5
		CCTCCTAAGTTTCGAGCTGGACTCAGTG	acgttgcctgagacaaactt	CCTCCTAAGTTTCGAGCTGGACTCAGTGacgttgcctgagacaaactt	3487	0.45
		CCTCCTAAGTTTCGAGCTGGACTCAGTG	cgtgcagtcaactgcttaat	CCTCCTAAGTTTCGAGCTGGACTCAGTGcgtgcagtcaactgcttaat	3565	0.45
		CCTCCTAAGTTTCGAGCTGGACTCAGTG	atgttctcctgatgttcatt	CCTCCTAAGTTTCGAGCTGGACTCAGTGatgttctcctgatgttcatt	3745	0.35
		CCTCCTAAGTTTCGAGCTGGACTCAGTG	acgttgataggtatgcagga	CCTCCTAAGTTTCGAGCTGGACTCAGTGacgttgataggtatgcagga	3767	0.45
		CCTCCTAAGTTTCGAGCTGGACTCAGTG	ataactcttgactttccggt	CCTCCTAAGTTTCGAGCTGGACTCAGTGataactcttgactttccggt	3838	0.4
		CCTCCTAAGTTTCGAGCTGGACTCAGTG	tatcaagattttgcggtcca	CCTCCTAAGTTTCGAGCTGGACTCAGTGtatcaagattttgcggtcca	3905	0.4
		CCTCCTAAGTTTCGAGCTGGACTCAGTG	gtagtaggtggaattggtcg	CCTCCTAAGTTTCGAGCTGGACTCAGTGgtagtaggtggaattggtcg	3996	0.5
		CCTCCTAAGTTTCGAGCTGGACTCAGTG	ccaaatcgcattggcagtaa	CCTCCTAAGTTTCGAGCTGGACTCAGTGccaaatcgcattggcagtaa	4432	0.45
		CCTCCTAAGTTTCGAGCTGGACTCAGTG	caaagtctatggccttcttg	CCTCCTAAGTTTCGAGCTGGACTCAGTGcaaagtctatggccttcttg	4509	0.45
		CCTCCTAAGTTTCGAGCTGGACTCAGTG	gacagatctctggatgcatg	CCTCCTAAGTTTCGAGCTGGACTCAGTGgacagatctctggatgcatg	4644	0.5
		CCTCCTAAGTTTCGAGCTGGACTCAGTG	gtttatcaactgatcctcgt	CCTCCTAAGTTTCGAGCTGGACTCAGTGgtttatcaactgatcctcgt	4685	0.4
		CCTCCTAAGTTTCGAGCTGGACTCAGTG	aggcgaaacgagcagtacac	CCTCCTAAGTTTCGAGCTGGACTCAGTGaggcgaaacgagcagtacac	4710	0.55
		CCTCCTAAGTTTCGAGCTGGACTCAGTG	ctgggaataacctggcttag	CCTCCTAAGTTTCGAGCTGGACTCAGTGctgggaataacctggcttag	4921	0.5
		CCTCCTAAGTTTCGAGCTGGACTCAGTG	tcatcgcggtccaaattgaa	CCTCCTAAGTTTCGAGCTGGACTCAGTGtcatcgcggtccaaattgaa	5176	0.45
		CCTCCTAAGTTTCGAGCTGGACTCAGTG	atacactacgccatgcatag	CCTCCTAAGTTTCGAGCTGGACTCAGTGatacactacgccatgcatag	5565	0.45
ZnT49B
		CCTCCTAAGTTTCGAGCTGGACTCAGTG	aaatttaaccatcaccggct	CCTCCTAAGTTTCGAGCTGGACTCAGTGaaatttaaccatcaccggct	42	0.4
		CCTCCTAAGTTTCGAGCTGGACTCAGTG	ttgagggcgtacttgcaaat	CCTCCTAAGTTTCGAGCTGGACTCAGTGttgagggcgtacttgcaaat	98	0.45
		CCTCCTAAGTTTCGAGCTGGACTCAGTG	gggtgcaaaacgaattgcgg	CCTCCTAAGTTTCGAGCTGGACTCAGTGgggtgcaaaacgaattgcgg	189	0.55
		CCTCCTAAGTTTCGAGCTGGACTCAGTG	cgcaaaactacgtcatgcgg	CCTCCTAAGTTTCGAGCTGGACTCAGTGcgcaaaactacgtcatgcgg	221	0.55
		CCTCCTAAGTTTCGAGCTGGACTCAGTG	agttcttttctattgtgggg	CCTCCTAAGTTTCGAGCTGGACTCAGTGagttcttttctattgtgggg	265	0.4
		CCTCCTAAGTTTCGAGCTGGACTCAGTG	cgtcactatcgcactataga	CCTCCTAAGTTTCGAGCTGGACTCAGTGcgtcactatcgcactataga	293	0.45
		CCTCCTAAGTTTCGAGCTGGACTCAGTG	ctaaaagcctttcccaagtg	CCTCCTAAGTTTCGAGCTGGACTCAGTGctaaaagcctttcccaagtg	372	0.45
		CCTCCTAAGTTTCGAGCTGGACTCAGTG	ggtttttccttcttggaatc	CCTCCTAAGTTTCGAGCTGGACTCAGTGggtttttccttcttggaatc	516	0.4
		CCTCCTAAGTTTCGAGCTGGACTCAGTG	ttgtggtcttcacctcaaag	CCTCCTAAGTTTCGAGCTGGACTCAGTGttgtggtcttcacctcaaag	590	0.45
		CCTCCTAAGTTTCGAGCTGGACTCAGTG	atggtggtgctgatagacag	CCTCCTAAGTTTCGAGCTGGACTCAGTGatggtggtgctgatagacag	618	0.5
		CCTCCTAAGTTTCGAGCTGGACTCAGTG	ctcgttaattttggagtcct	CCTCCTAAGTTTCGAGCTGGACTCAGTGctcgttaattttggagtcct	640	0.4
		CCTCCTAAGTTTCGAGCTGGACTCAGTG	aacagaaccagagctctctc	CCTCCTAAGTTTCGAGCTGGACTCAGTGaacagaaccagagctctctc	781	0.5
		CCTCCTAAGTTTCGAGCTGGACTCAGTG	cttttcactgtttcaggagg	CCTCCTAAGTTTCGAGCTGGACTCAGTGcttttcactgtttcaggagg	807	0.45
		CCTCCTAAGTTTCGAGCTGGACTCAGTG	agcaccagacggagaatttt	CCTCCTAAGTTTCGAGCTGGACTCAGTGagcaccagacggagaatttt	835	0.45
		CCTCCTAAGTTTCGAGCTGGACTCAGTG	aggtggggatgttcgaatac	CCTCCTAAGTTTCGAGCTGGACTCAGTGaggtggggatgttcgaatac	880	0.5
		CCTCCTAAGTTTCGAGCTGGACTCAGTG	tttagaggaatcacaggcgc	CCTCCTAAGTTTCGAGCTGGACTCAGTGtttagaggaatcacaggcgc	918	0.5
		CCTCCTAAGTTTCGAGCTGGACTCAGTG	gcacgataatcgaatcgggg	CCTCCTAAGTTTCGAGCTGGACTCAGTGgcacgataatcgaatcgggg	942	0.55
		CCTCCTAAGTTTCGAGCTGGACTCAGTG	gtcacaaagttgcgctctag	CCTCCTAAGTTTCGAGCTGGACTCAGTGgtcacaaagttgcgctctag	966	0.5
		CCTCCTAAGTTTCGAGCTGGACTCAGTG	acaagaaatcgctgatggcc	CCTCCTAAGTTTCGAGCTGGACTCAGTGacaagaaatcgctgatggcc	995	0.5
		CCTCCTAAGTTTCGAGCTGGACTCAGTG	cagactttcgagttgagcag	CCTCCTAAGTTTCGAGCTGGACTCAGTGcagactttcgagttgagcag	1021	0.5
		CCTCCTAAGTTTCGAGCTGGACTCAGTG	gcaacagattttccttggac	CCTCCTAAGTTTCGAGCTGGACTCAGTGgcaacagattttccttggac	1136	0.45
		CCTCCTAAGTTTCGAGCTGGACTCAGTG	aaccgccgtttaacagtgaa	CCTCCTAAGTTTCGAGCTGGACTCAGTGaaccgccgtttaacagtgaa	1206	0.45
		CCTCCTAAGTTTCGAGCTGGACTCAGTG	ctttctgttgtcgagcatta	CCTCCTAAGTTTCGAGCTGGACTCAGTGctttctgttgtcgagcatta	1264	0.4
		CCTCCTAAGTTTCGAGCTGGACTCAGTG	aattggctgcattgatagcg	CCTCCTAAGTTTCGAGCTGGACTCAGTGaattggctgcattgatagcg	1322	0.45
		CCTCCTAAGTTTCGAGCTGGACTCAGTG	cttctgcaaacatgctgtga	CCTCCTAAGTTTCGAGCTGGACTCAGTGcttctgcaaacatgctgtga	1379	0.45
		CCTCCTAAGTTTCGAGCTGGACTCAGTG	gagctggttgattaagtcgg	CCTCCTAAGTTTCGAGCTGGACTCAGTGgagctggttgattaagtcgg	1414	0.5
		CCTCCTAAGTTTCGAGCTGGACTCAGTG	agaggacttgtagatgccaa	CCTCCTAAGTTTCGAGCTGGACTCAGTGagaggacttgtagatgccaa	1444	0.45
		CCTCCTAAGTTTCGAGCTGGACTCAGTG	cgcatgttcatgtatccata	CCTCCTAAGTTTCGAGCTGGACTCAGTGcgcatgttcatgtatccata	1488	0.4
		CCTCCTAAGTTTCGAGCTGGACTCAGTG	cccgaaatcagcgaggaaac	CCTCCTAAGTTTCGAGCTGGACTCAGTGcccgaaatcagcgaggaaac	1512	0.55
		CCTCCTAAGTTTCGAGCTGGACTCAGTG	ccacagccaacgcaaaagat	CCTCCTAAGTTTCGAGCTGGACTCAGTGccacagccaacgcaaaagat	1539	0.5
		CCTCCTAAGTTTCGAGCTGGACTCAGTG	gagaatgccatcaataccgt	CCTCCTAAGTTTCGAGCTGGACTCAGTGgagaatgccatcaataccgt	1573	0.45
		CCTCCTAAGTTTCGAGCTGGACTCAGTG	atagatctgttatgggttcc	CCTCCTAAGTTTCGAGCTGGACTCAGTGatagatctgttatgggttcc	1598	0.4
		CCTCCTAAGTTTCGAGCTGGACTCAGTG	gctccctcagaaactaatga	CCTCCTAAGTTTCGAGCTGGACTCAGTGgctccctcagaaactaatga	1644	0.45
		CCTCCTAAGTTTCGAGCTGGACTCAGTG	cttaagctcattaatggcca	CCTCCTAAGTTTCGAGCTGGACTCAGTGcttaagctcattaatggcca	1675	0.4
		CCTCCTAAGTTTCGAGCTGGACTCAGTG	acatattgttttccttagcc	CCTCCTAAGTTTCGAGCTGGACTCAGTGacatattgttttccttagcc	1700	0.35
		CCTCCTAAGTTTCGAGCTGGACTCAGTG	atccttgccagaaatcacat	CCTCCTAAGTTTCGAGCTGGACTCAGTGatccttgccagaaatcacat	1732	0.4
		CCTCCTAAGTTTCGAGCTGGACTCAGTG	ctataaccagtgaaccagcg	CCTCCTAAGTTTCGAGCTGGACTCAGTGctataaccagtgaaccagcg	1862	0.5
		CCTCCTAAGTTTCGAGCTGGACTCAGTG	cgctcggaagcaatggatat	CCTCCTAAGTTTCGAGCTGGACTCAGTGcgctcggaagcaatggatat	1944	0.5
		CCTCCTAAGTTTCGAGCTGGACTCAGTG	cattacatcagcctccaaag	CCTCCTAAGTTTCGAGCTGGACTCAGTGcattacatcagcctccaaag	1984	0.45
		CCTCCTAAGTTTCGAGCTGGACTCAGTG	ccttgacatcgtaaatcgct	CCTCCTAAGTTTCGAGCTGGACTCAGTGccttgacatcgtaaatcgct	2009	0.45
		CCTCCTAAGTTTCGAGCTGGACTCAGTG	cgagcattgccaatatcgat	CCTCCTAAGTTTCGAGCTGGACTCAGTGcgagcattgccaatatcgat	2031	0.45
		CCTCCTAAGTTTCGAGCTGGACTCAGTG	gtttgtccagatacgaacgg	CCTCCTAAGTTTCGAGCTGGACTCAGTGgtttgtccagatacgaacgg	2096	0.5
		CCTCCTAAGTTTCGAGCTGGACTCAGTG	tcaaccttttgaaagcctcg	CCTCCTAAGTTTCGAGCTGGACTCAGTGtcaaccttttgaaagcctcg	2145	0.45
		CCTCCTAAGTTTCGAGCTGGACTCAGTG	cacaatgttttcgccttgat	CCTCCTAAGTTTCGAGCTGGACTCAGTGcacaatgttttcgccttgat	2188	0.4
		CCTCCTAAGTTTCGAGCTGGACTCAGTG	gcaagttcatctcaatgcga	CCTCCTAAGTTTCGAGCTGGACTCAGTGgcaagttcatctcaatgcga	2231	0.45
		CCTCCTAAGTTTCGAGCTGGACTCAGTG	gcgattagagtatttccagg	CCTCCTAAGTTTCGAGCTGGACTCAGTGgcgattagagtatttccagg	2282	0.45
		CCTCCTAAGTTTCGAGCTGGACTCAGTG	aaccaaatcacccaatgctt	CCTCCTAAGTTTCGAGCTGGACTCAGTGaaccaaatcacccaatgctt	2335	0.4
		CCTCCTAAGTTTCGAGCTGGACTCAGTG	tatattcaaaccacgggctc	CCTCCTAAGTTTCGAGCTGGACTCAGTGtatattcaaaccacgggctc	2466	0.45
CG8202
		CCTCCTAAGTTTCGAGCTGGACTCAGTG	cgaattcgctgaccatttga	CCTCCTAAGTTTCGAGCTGGACTCAGTGcgaattcgctgaccatttga	246	0.45
		CCTCCTAAGTTTCGAGCTGGACTCAGTG	ctcattggttgtaaagcggt	CCTCCTAAGTTTCGAGCTGGACTCAGTGctcattggttgtaaagcggt	353	0.45
		CCTCCTAAGTTTCGAGCTGGACTCAGTG	gacaccagaaagctggtaga	CCTCCTAAGTTTCGAGCTGGACTCAGTGgacaccagaaagctggtaga	385	0.5
		CCTCCTAAGTTTCGAGCTGGACTCAGTG	tgctttaatgctttcgttgc	CCTCCTAAGTTTCGAGCTGGACTCAGTGtgctttaatgctttcgttgc	425	0.4
		CCTCCTAAGTTTCGAGCTGGACTCAGTG	ctccaagcgaaactttgtct	CCTCCTAAGTTTCGAGCTGGACTCAGTGctccaagcgaaactttgtct	464	0.45
		CCTCCTAAGTTTCGAGCTGGACTCAGTG	tgctcaaaccgctgaatgta	CCTCCTAAGTTTCGAGCTGGACTCAGTGtgctcaaaccgctgaatgta	544	0.45
		CCTCCTAAGTTTCGAGCTGGACTCAGTG	cttttactcgctgatcgttg	CCTCCTAAGTTTCGAGCTGGACTCAGTGcttttactcgctgatcgttg	594	0.45
		CCTCCTAAGTTTCGAGCTGGACTCAGTG	cacactgtatggctatcttc	CCTCCTAAGTTTCGAGCTGGACTCAGTGcacactgtatggctatcttc	618	0.45
		CCTCCTAAGTTTCGAGCTGGACTCAGTG	tagaattgcagcacagtggt	CCTCCTAAGTTTCGAGCTGGACTCAGTGtagaattgcagcacagtggt	655	0.45
		CCTCCTAAGTTTCGAGCTGGACTCAGTG	aaccaattctggcacgtatc	CCTCCTAAGTTTCGAGCTGGACTCAGTGaaccaattctggcacgtatc	811	0.45
		CCTCCTAAGTTTCGAGCTGGACTCAGTG	cggcagtaactcacgaatcg	CCTCCTAAGTTTCGAGCTGGACTCAGTGcggcagtaactcacgaatcg	845	0.55
		CCTCCTAAGTTTCGAGCTGGACTCAGTG	acaggaactcgtagcacttg	CCTCCTAAGTTTCGAGCTGGACTCAGTGacaggaactcgtagcacttg	891	0.5
		CCTCCTAAGTTTCGAGCTGGACTCAGTG	acgttgcaaaatgcgctcat	CCTCCTAAGTTTCGAGCTGGACTCAGTGacgttgcaaaatgcgctcat	929	0.45
		CCTCCTAAGTTTCGAGCTGGACTCAGTG	gcatagctcgataccaaagg	CCTCCTAAGTTTCGAGCTGGACTCAGTGgcatagctcgataccaaagg	979	0.5
		CCTCCTAAGTTTCGAGCTGGACTCAGTG	aacaggtcggcaaagttctc	CCTCCTAAGTTTCGAGCTGGACTCAGTGaacaggtcggcaaagttctc	1057	0.5
		CCTCCTAAGTTTCGAGCTGGACTCAGTG	cggatgcagattaaagcggg	CCTCCTAAGTTTCGAGCTGGACTCAGTGcggatgcagattaaagcggg	1109	0.55
		CCTCCTAAGTTTCGAGCTGGACTCAGTG	tcaaaggctggggcatatag	CCTCCTAAGTTTCGAGCTGGACTCAGTGtcaaaggctggggcatatag	1159	0.5
		CCTCCTAAGTTTCGAGCTGGACTCAGTG	tcaactgcttgcactcatta	CCTCCTAAGTTTCGAGCTGGACTCAGTGtcaactgcttgcactcatta	1233	0.4
		CCTCCTAAGTTTCGAGCTGGACTCAGTG	ggcgtttcggaagcattaat	CCTCCTAAGTTTCGAGCTGGACTCAGTGggcgtttcggaagcattaat	1339	0.45
		CCTCCTAAGTTTCGAGCTGGACTCAGTG	cttgttgatcgtctcgaagg	CCTCCTAAGTTTCGAGCTGGACTCAGTGcttgttgatcgtctcgaagg	1454	0.5
		CCTCCTAAGTTTCGAGCTGGACTCAGTG	tgtgatacaaagacagccca	CCTCCTAAGTTTCGAGCTGGACTCAGTGtgtgatacaaagacagccca	1513	0.45
		CCTCCTAAGTTTCGAGCTGGACTCAGTG	attcagttctcctagcaatc	CCTCCTAAGTTTCGAGCTGGACTCAGTGattcagttctcctagcaatc	1559	0.4
		CCTCCTAAGTTTCGAGCTGGACTCAGTG	ttttcataggctttgccaag	CCTCCTAAGTTTCGAGCTGGACTCAGTGttttcataggctttgccaag	1591	0.4
		CCTCCTAAGTTTCGAGCTGGACTCAGTG	tccgggtaagaatgttttgc	CCTCCTAAGTTTCGAGCTGGACTCAGTGtccgggtaagaatgttttgc	1626	0.45
		CCTCCTAAGTTTCGAGCTGGACTCAGTG	caatgctgcgatagttttgc	CCTCCTAAGTTTCGAGCTGGACTCAGTGcaatgctgcgatagttttgc	1650	0.45
		CCTCCTAAGTTTCGAGCTGGACTCAGTG	caccgactccttttgaaaga	CCTCCTAAGTTTCGAGCTGGACTCAGTGcaccgactccttttgaaaga	1712	0.45
		CCTCCTAAGTTTCGAGCTGGACTCAGTG	cacagcgtcgcaagtatatt	CCTCCTAAGTTTCGAGCTGGACTCAGTGcacagcgtcgcaagtatatt	1784	0.45
		CCTCCTAAGTTTCGAGCTGGACTCAGTG	caagatcttcccgagataca	CCTCCTAAGTTTCGAGCTGGACTCAGTGcaagatcttcccgagataca	1820	0.45
		CCTCCTAAGTTTCGAGCTGGACTCAGTG	gacagggcattcactgaatc	CCTCCTAAGTTTCGAGCTGGACTCAGTGgacagggcattcactgaatc	1843	0.5
		CCTCCTAAGTTTCGAGCTGGACTCAGTG	gatgagctgagctatctgac	CCTCCTAAGTTTCGAGCTGGACTCAGTGgatgagctgagctatctgac	1880	0.5
		CCTCCTAAGTTTCGAGCTGGACTCAGTG	gcaccagagtaacgtatact	CCTCCTAAGTTTCGAGCTGGACTCAGTGgcaccagagtaacgtatact	1995	0.45
		CCTCCTAAGTTTCGAGCTGGACTCAGTG	tgatttcgaacggtttcggg	CCTCCTAAGTTTCGAGCTGGACTCAGTGtgatttcgaacggtttcggg	2036	0.5
		CCTCCTAAGTTTCGAGCTGGACTCAGTG	cagcttcaatgctgggaatg	CCTCCTAAGTTTCGAGCTGGACTCAGTGcagcttcaatgctgggaatg	2097	0.5
		CCTCCTAAGTTTCGAGCTGGACTCAGTG	cagacagagatgctgcagag	CCTCCTAAGTTTCGAGCTGGACTCAGTGcagacagagatgctgcagag	2159	0.55
		CCTCCTAAGTTTCGAGCTGGACTCAGTG	aaggaatggctctaagctgc	CCTCCTAAGTTTCGAGCTGGACTCAGTGaaggaatggctctaagctgc	2264	0.5
		CCTCCTAAGTTTCGAGCTGGACTCAGTG	cgattaatgtggccaggata	CCTCCTAAGTTTCGAGCTGGACTCAGTGcgattaatgtggccaggata	2301	0.45
		CCTCCTAAGTTTCGAGCTGGACTCAGTG	cacttctagcagaaggcgaa	CCTCCTAAGTTTCGAGCTGGACTCAGTGcacttctagcagaaggcgaa	2360	0.5
		CCTCCTAAGTTTCGAGCTGGACTCAGTG	agatagatgatactcggcgc	CCTCCTAAGTTTCGAGCTGGACTCAGTGagatagatgatactcggcgc	2413	0.5
		CCTCCTAAGTTTCGAGCTGGACTCAGTG	gcacatacagcatatcgagg	CCTCCTAAGTTTCGAGCTGGACTCAGTGgcacatacagcatatcgagg	2439	0.5
		CCTCCTAAGTTTCGAGCTGGACTCAGTG	cacatattgtttacctcctg	CCTCCTAAGTTTCGAGCTGGACTCAGTGcacatattgtttacctcctg	2539	0.4
		CCTCCTAAGTTTCGAGCTGGACTCAGTG	agctgcagaagaatggcatc	CCTCCTAAGTTTCGAGCTGGACTCAGTGagctgcagaagaatggcatc	2572	0.5
		CCTCCTAAGTTTCGAGCTGGACTCAGTG	aaaaagttccagggctagct	CCTCCTAAGTTTCGAGCTGGACTCAGTGaaaaagttccagggctagct	2633	0.45
		CCTCCTAAGTTTCGAGCTGGACTCAGTG	tcagcgtactttacaatcct	CCTCCTAAGTTTCGAGCTGGACTCAGTGtcagcgtactttacaatcct	2656	0.4
		CCTCCTAAGTTTCGAGCTGGACTCAGTG	gactgccaattgagcgatag	CCTCCTAAGTTTCGAGCTGGACTCAGTGgactgccaattgagcgatag	2690	0.5
		CCTCCTAAGTTTCGAGCTGGACTCAGTG	ttgtgattgtgccttgttag	CCTCCTAAGTTTCGAGCTGGACTCAGTGttgtgattgtgccttgttag	2726	0.4
		CCTCCTAAGTTTCGAGCTGGACTCAGTG	atatgatctctacactgcgc	CCTCCTAAGTTTCGAGCTGGACTCAGTGatatgatctctacactgcgc	2775	0.45
		CCTCCTAAGTTTCGAGCTGGACTCAGTG	ggtgatgcatcctttatttg	CCTCCTAAGTTTCGAGCTGGACTCAGTGggtgatgcatcctttatttg	2800	0.4
		CCTCCTAAGTTTCGAGCTGGACTCAGTG	gtttatcacctacgtaggta	CCTCCTAAGTTTCGAGCTGGACTCAGTGgtttatcacctacgtaggta	3069	0.4
CG7943
		CCTCCTAAGTTTCGAGCTGGACTCAGTG	accaatcgctgggtactaaa	CCTCCTAAGTTTCGAGCTGGACTCAGTGaccaatcgctgggtactaaa	2	0.45
		CCTCCTAAGTTTCGAGCTGGACTCAGTG	cgtacttgatgtcttcgttc	CCTCCTAAGTTTCGAGCTGGACTCAGTGcgtacttgatgtcttcgttc	71	0.45
		CCTCCTAAGTTTCGAGCTGGACTCAGTG	cctaacaggggtaaacctta	CCTCCTAAGTTTCGAGCTGGACTCAGTGcctaacaggggtaaacctta	96	0.45
		CCTCCTAAGTTTCGAGCTGGACTCAGTG	cctaatgacgacgatggtct	CCTCCTAAGTTTCGAGCTGGACTCAGTGcctaatgacgacgatggtct	140	0.5
		CCTCCTAAGTTTCGAGCTGGACTCAGTG	cactgacttggctaattggt	CCTCCTAAGTTTCGAGCTGGACTCAGTGcactgacttggctaattggt	163	0.45
		CCTCCTAAGTTTCGAGCTGGACTCAGTG	tagcgtgggaacacctttaa	CCTCCTAAGTTTCGAGCTGGACTCAGTGtagcgtgggaacacctttaa	196	0.45
		CCTCCTAAGTTTCGAGCTGGACTCAGTG	tcaggagacgaaggtttcga	CCTCCTAAGTTTCGAGCTGGACTCAGTGtcaggagacgaaggtttcga	221	0.5
		CCTCCTAAGTTTCGAGCTGGACTCAGTG	ttcaaaagatccgtctcctg	CCTCCTAAGTTTCGAGCTGGACTCAGTGttcaaaagatccgtctcctg	312	0.45
		CCTCCTAAGTTTCGAGCTGGACTCAGTG	tgattattttctgctgcagc	CCTCCTAAGTTTCGAGCTGGACTCAGTGtgattattttctgctgcagc	362	0.4
		CCTCCTAAGTTTCGAGCTGGACTCAGTG	aagttcataagcggtggagc	CCTCCTAAGTTTCGAGCTGGACTCAGTGaagttcataagcggtggagc	399	0.5
		CCTCCTAAGTTTCGAGCTGGACTCAGTG	ttgggagtggaactggtatc	CCTCCTAAGTTTCGAGCTGGACTCAGTGttgggagtggaactggtatc	450	0.5
		CCTCCTAAGTTTCGAGCTGGACTCAGTG	ggcgaacatgtcgaatagca	CCTCCTAAGTTTCGAGCTGGACTCAGTGggcgaacatgtcgaatagca	529	0.5
		CCTCCTAAGTTTCGAGCTGGACTCAGTG	ctttcttcaagttgtccatc	CCTCCTAAGTTTCGAGCTGGACTCAGTGctttcttcaagttgtccatc	641	0.4
		CCTCCTAAGTTTCGAGCTGGACTCAGTG	cgtctcgtagttatttagct	CCTCCTAAGTTTCGAGCTGGACTCAGTGcgtctcgtagttatttagct	667	0.4
		CCTCCTAAGTTTCGAGCTGGACTCAGTG	gattgagatgctgagtttcc	CCTCCTAAGTTTCGAGCTGGACTCAGTGgattgagatgctgagtttcc	698	0.45
		CCTCCTAAGTTTCGAGCTGGACTCAGTG	agcacaatattgggggcaac	CCTCCTAAGTTTCGAGCTGGACTCAGTGagcacaatattgggggcaac	738	0.5
		CCTCCTAAGTTTCGAGCTGGACTCAGTG	cgggaataacgaactgctgc	CCTCCTAAGTTTCGAGCTGGACTCAGTGcgggaataacgaactgctgc	776	0.55
		CCTCCTAAGTTTCGAGCTGGACTCAGTG	atgtccttgacgaaactcgt	CCTCCTAAGTTTCGAGCTGGACTCAGTGatgtccttgacgaaactcgt	801	0.45
		CCTCCTAAGTTTCGAGCTGGACTCAGTG	ggtcttgcagcgattgtaaa	CCTCCTAAGTTTCGAGCTGGACTCAGTGggtcttgcagcgattgtaaa	829	0.45
		CCTCCTAAGTTTCGAGCTGGACTCAGTG	gaatgtagtcggccaacttg	CCTCCTAAGTTTCGAGCTGGACTCAGTGgaatgtagtcggccaacttg	860	0.5
		CCTCCTAAGTTTCGAGCTGGACTCAGTG	ccaggaatcgggattatagc	CCTCCTAAGTTTCGAGCTGGACTCAGTGccaggaatcgggattatagc	892	0.5
		CCTCCTAAGTTTCGAGCTGGACTCAGTG	cttactgcaactctggagtg	CCTCCTAAGTTTCGAGCTGGACTCAGTGcttactgcaactctggagtg	976	0.5
		CCTCCTAAGTTTCGAGCTGGACTCAGTG	acataagagtgcacgacctt	CCTCCTAAGTTTCGAGCTGGACTCAGTGacataagagtgcacgacctt	1035	0.45
		CCTCCTAAGTTTCGAGCTGGACTCAGTG	gattgtgtggctttttgttc	CCTCCTAAGTTTCGAGCTGGACTCAGTGgattgtgtggctttttgttc	1103	0.4
		CCTCCTAAGTTTCGAGCTGGACTCAGTG	ttgacaagggcgttcatcag	CCTCCTAAGTTTCGAGCTGGACTCAGTGttgacaagggcgttcatcag	1158	0.5
		CCTCCTAAGTTTCGAGCTGGACTCAGTG	tagtcgaagatctcagcgga	CCTCCTAAGTTTCGAGCTGGACTCAGTGtagtcgaagatctcagcgga	1191	0.5
		CCTCCTAAGTTTCGAGCTGGACTCAGTG	ccgtttgaaccaagacatgg	CCTCCTAAGTTTCGAGCTGGACTCAGTGccgtttgaaccaagacatgg	1213	0.5
		CCTCCTAAGTTTCGAGCTGGACTCAGTG	cggacaggaatacggcatta	CCTCCTAAGTTTCGAGCTGGACTCAGTGcggacaggaatacggcatta	1262	0.5
		CCTCCTAAGTTTCGAGCTGGACTCAGTG	tggagcagcactggaagtaa	CCTCCTAAGTTTCGAGCTGGACTCAGTGtggagcagcactggaagtaa	1379	0.5
		CCTCCTAAGTTTCGAGCTGGACTCAGTG	taccgcatgagtgcataatc	CCTCCTAAGTTTCGAGCTGGACTCAGTGtaccgcatgagtgcataatc	1514	0.45
		CCTCCTAAGTTTCGAGCTGGACTCAGTG	aactgtccggaatagtcgta	CCTCCTAAGTTTCGAGCTGGACTCAGTGaactgtccggaatagtcgta	1536	0.45
		CCTCCTAAGTTTCGAGCTGGACTCAGTG	aaagatgcccattacgttgg	CCTCCTAAGTTTCGAGCTGGACTCAGTGaaagatgcccattacgttgg	1618	0.45
		CCTCCTAAGTTTCGAGCTGGACTCAGTG	ctcactgtattgcctaagtg	CCTCCTAAGTTTCGAGCTGGACTCAGTGctcactgtattgcctaagtg	1659	0.45
		CCTCCTAAGTTTCGAGCTGGACTCAGTG	gctcctcacaaaactgtagt	CCTCCTAAGTTTCGAGCTGGACTCAGTGgctcctcacaaaactgtagt	1682	0.45
		CCTCCTAAGTTTCGAGCTGGACTCAGTG	ggttgtcgtagcgatggaaa	CCTCCTAAGTTTCGAGCTGGACTCAGTGggttgtcgtagcgatggaaa	1718	0.5
		CCTCCTAAGTTTCGAGCTGGACTCAGTG	ttcttgttggacagatgctt	CCTCCTAAGTTTCGAGCTGGACTCAGTGttcttgttggacagatgctt	1740	0.4
		CCTCCTAAGTTTCGAGCTGGACTCAGTG	gctggcagctgaaaagagta	CCTCCTAAGTTTCGAGCTGGACTCAGTGgctggcagctgaaaagagta	1810	0.5
		CCTCCTAAGTTTCGAGCTGGACTCAGTG	cattccggagagacgatgac	CCTCCTAAGTTTCGAGCTGGACTCAGTGcattccggagagacgatgac	1852	0.55
		CCTCCTAAGTTTCGAGCTGGACTCAGTG	aacttgacgcactccaagtg	CCTCCTAAGTTTCGAGCTGGACTCAGTGaacttgacgcactccaagtg	1932	0.5
		CCTCCTAAGTTTCGAGCTGGACTCAGTG	tgtgtggtacatgacactgt	CCTCCTAAGTTTCGAGCTGGACTCAGTGtgtgtggtacatgacactgt	1961	0.45
		CCTCCTAAGTTTCGAGCTGGACTCAGTG	tagtcagagagattcggctg	CCTCCTAAGTTTCGAGCTGGACTCAGTGtagtcagagagattcggctg	2334	0.5
		CCTCCTAAGTTTCGAGCTGGACTCAGTG	gatggtattttgggtactct	CCTCCTAAGTTTCGAGCTGGACTCAGTGgatggtattttgggtactct	2405	0.4
		CCTCCTAAGTTTCGAGCTGGACTCAGTG	gactaaccaagcagcgtgaa	CCTCCTAAGTTTCGAGCTGGACTCAGTGgactaaccaagcagcgtgaa	2427	0.5
		CCTCCTAAGTTTCGAGCTGGACTCAGTG	cacgtgggatgactactaca	CCTCCTAAGTTTCGAGCTGGACTCAGTGcacgtgggatgactactaca	2457	0.5
		CCTCCTAAGTTTCGAGCTGGACTCAGTG	acaagtacaaatgccgctcg	CCTCCTAAGTTTCGAGCTGGACTCAGTGacaagtacaaatgccgctcg	2510	0.5
		CCTCCTAAGTTTCGAGCTGGACTCAGTG	ttttgtggctaactaagcgc	CCTCCTAAGTTTCGAGCTGGACTCAGTGttttgtggctaactaagcgc	2538	0.45
		CCTCCTAAGTTTCGAGCTGGACTCAGTG	atattgtgtgcgttttcagc	CCTCCTAAGTTTCGAGCTGGACTCAGTGatattgtgtgcgttttcagc	2776	0.4
		CCTCCTAAGTTTCGAGCTGGACTCAGTG	tcttccaacctcaaaagacc	CCTCCTAAGTTTCGAGCTGGACTCAGTGtcttccaacctcaaaagacc	2817	0.45
SoxN
		CCTCCTAAGTTTCGAGCTGGACTCAGTG	ctttttggctagctgatgac	CCTCCTAAGTTTCGAGCTGGACTCAGTGctttttggctagctgatgac	196	0.45
		CCTCCTAAGTTTCGAGCTGGACTCAGTG	gaattgagcacctttctgtt	CCTCCTAAGTTTCGAGCTGGACTCAGTGgaattgagcacctttctgtt	310	0.4
		CCTCCTAAGTTTCGAGCTGGACTCAGTG	gagaagcgggaacaccgaaa	CCTCCTAAGTTTCGAGCTGGACTCAGTGgagaagcgggaacaccgaaa	350	0.55
		CCTCCTAAGTTTCGAGCTGGACTCAGTG	gcctcagaatattgttgttg	CCTCCTAAGTTTCGAGCTGGACTCAGTGgcctcagaatattgttgttg	436	0.4
		CCTCCTAAGTTTCGAGCTGGACTCAGTG	tgctaaaacccgacgcgaaa	CCTCCTAAGTTTCGAGCTGGACTCAGTGtgctaaaacccgacgcgaaa	458	0.5
		CCTCCTAAGTTTCGAGCTGGACTCAGTG	agaggcggcgtaaaacactt	CCTCCTAAGTTTCGAGCTGGACTCAGTGagaggcggcgtaaaacactt	487	0.5
		CCTCCTAAGTTTCGAGCTGGACTCAGTG	cgttttttccacagtcacaa	CCTCCTAAGTTTCGAGCTGGACTCAGTGcgttttttccacagtcacaa	548	0.4
		CCTCCTAAGTTTCGAGCTGGACTCAGTG	cggctatctttggatttgta	CCTCCTAAGTTTCGAGCTGGACTCAGTGcggctatctttggatttgta	586	0.4
		CCTCCTAAGTTTCGAGCTGGACTCAGTG	tcgtatctttacgcgtatca	CCTCCTAAGTTTCGAGCTGGACTCAGTGtcgtatctttacgcgtatca	619	0.4
		CCTCCTAAGTTTCGAGCTGGACTCAGTG	tttgattttcgctgcagttt	CCTCCTAAGTTTCGAGCTGGACTCAGTGtttgattttcgctgcagttt	654	0.35
		CCTCCTAAGTTTCGAGCTGGACTCAGTG	aaccatgttgcacttgtgat	CCTCCTAAGTTTCGAGCTGGACTCAGTGaaccatgttgcacttgtgat	683	0.4
		CCTCCTAAGTTTCGAGCTGGACTCAGTG	gctttagtttactctttgct	CCTCCTAAGTTTCGAGCTGGACTCAGTGgctttagtttactctttgct	732	0.35
		CCTCCTAAGTTTCGAGCTGGACTCAGTG	cctctaagatgcagttactc	CCTCCTAAGTTTCGAGCTGGACTCAGTGcctctaagatgcagttactc	756	0.45
		CCTCCTAAGTTTCGAGCTGGACTCAGTG	tgactcaaagttggttctcc	CCTCCTAAGTTTCGAGCTGGACTCAGTGtgactcaaagttggttctcc	787	0.45
		CCTCCTAAGTTTCGAGCTGGACTCAGTG	gttttcggtgcgataaagct	CCTCCTAAGTTTCGAGCTGGACTCAGTGgttttcggtgcgataaagct	811	0.45
		CCTCCTAAGTTTCGAGCTGGACTCAGTG	catcttgcggggattacttc	CCTCCTAAGTTTCGAGCTGGACTCAGTGcatcttgcggggattacttc	833	0.5
		CCTCCTAAGTTTCGAGCTGGACTCAGTG	ctttcatatccgattccatg	CCTCCTAAGTTTCGAGCTGGACTCAGTGctttcatatccgattccatg	858	0.4
		CCTCCTAAGTTTCGAGCTGGACTCAGTG	aggttcataaggggagctag	CCTCCTAAGTTTCGAGCTGGACTCAGTGaggttcataaggggagctag	958	0.5
		CCTCCTAAGTTTCGAGCTGGACTCAGTG	gtgatgatggtggttgtgat	CCTCCTAAGTTTCGAGCTGGACTCAGTGgtgatgatggtggttgtgat	1013	0.45
		CCTCCTAAGTTTCGAGCTGGACTCAGTG	tgggactcaattcgctggag	CCTCCTAAGTTTCGAGCTGGACTCAGTGtgggactcaattcgctggag	1176	0.55
		CCTCCTAAGTTTCGAGCTGGACTCAGTG	cgatgtcatgtgatggcttc	CCTCCTAAGTTTCGAGCTGGACTCAGTGcgatgtcatgtgatggcttc	1211	0.5
		CCTCCTAAGTTTCGAGCTGGACTCAGTG	ccaaaccatgaacgcattca	CCTCCTAAGTTTCGAGCTGGACTCAGTGccaaaccatgaacgcattca	1397	0.45
		CCTCCTAAGTTTCGAGCTGGACTCAGTG	ttcgagatctccgagttgtg	CCTCCTAAGTTTCGAGCTGGACTCAGTGttcgagatctccgagttgtg	1462	0.5
		CCTCCTAAGTTTCGAGCTGGACTCAGTG	tggtcagcgttttagtcttg	CCTCCTAAGTTTCGAGCTGGACTCAGTGtggtcagcgttttagtcttg	1605	0.45
		CCTCCTAAGTTTCGAGCTGGACTCAGTG	gcgttcatctggtacatatc	CCTCCTAAGTTTCGAGCTGGACTCAGTGgcgttcatctggtacatatc	1816	0.45
		CCTCCTAAGTTTCGAGCTGGACTCAGTG	cattgggcatgtatccattg	CCTCCTAAGTTTCGAGCTGGACTCAGTGcattgggcatgtatccattg	1839	0.45
		CCTCCTAAGTTTCGAGCTGGACTCAGTG	ccatgtaggaggtctgatag	CCTCCTAAGTTTCGAGCTGGACTCAGTGccatgtaggaggtctgatag	1896	0.5
		CCTCCTAAGTTTCGAGCTGGACTCAGTG	catacccgttgttgtacatg	CCTCCTAAGTTTCGAGCTGGACTCAGTGcatacccgttgttgtacatg	1953	0.45
		CCTCCTAAGTTTCGAGCTGGACTCAGTG	atgtggatatatccaggagg	CCTCCTAAGTTTCGAGCTGGACTCAGTGatgtggatatatccaggagg	3111	0.45
		CCTCCTAAGTTTCGAGCTGGACTCAGTG	atcctagggctttagttaat	CCTCCTAAGTTTCGAGCTGGACTCAGTGatcctagggctttagttaat	3148	0.35
		CCTCCTAAGTTTCGAGCTGGACTCAGTG	cctgcttaagaactaaggct	CCTCCTAAGTTTCGAGCTGGACTCAGTGcctgcttaagaactaaggct	3218	0.45
		CCTCCTAAGTTTCGAGCTGGACTCAGTG	actctgccacttcgaaattc	CCTCCTAAGTTTCGAGCTGGACTCAGTGactctgccacttcgaaattc	3246	0.45
		CCTCCTAAGTTTCGAGCTGGACTCAGTG	tgtggtacaacagtgcgtat	CCTCCTAAGTTTCGAGCTGGACTCAGTGtgtggtacaacagtgcgtat	3325	0.45
		CCTCCTAAGTTTCGAGCTGGACTCAGTG	gcaagtgagttgtcatctta	CCTCCTAAGTTTCGAGCTGGACTCAGTGgcaagtgagttgtcatctta	3349	0.4
		CCTCCTAAGTTTCGAGCTGGACTCAGTG	tcgaagcagaacggtatgga	CCTCCTAAGTTTCGAGCTGGACTCAGTGtcgaagcagaacggtatgga	3371	0.5
		CCTCCTAAGTTTCGAGCTGGACTCAGTG	ttagctatgcaacaagcggg	CCTCCTAAGTTTCGAGCTGGACTCAGTGttagctatgcaacaagcggg	3404	0.5
		CCTCCTAAGTTTCGAGCTGGACTCAGTG	ccgtaattggcaacagttta	CCTCCTAAGTTTCGAGCTGGACTCAGTGccgtaattggcaacagttta	3443	0.4
		CCTCCTAAGTTTCGAGCTGGACTCAGTG	acgaatttgttgttgttgcc	CCTCCTAAGTTTCGAGCTGGACTCAGTGacgaatttgttgttgttgcc	3470	0.4
		CCTCCTAAGTTTCGAGCTGGACTCAGTG	ttgctcccttcaattgaacg	CCTCCTAAGTTTCGAGCTGGACTCAGTGttgctcccttcaattgaacg	3554	0.45
		CCTCCTAAGTTTCGAGCTGGACTCAGTG	ctgcctttactcctactaaa	CCTCCTAAGTTTCGAGCTGGACTCAGTGctgcctttactcctactaaa	3597	0.4
		CCTCCTAAGTTTCGAGCTGGACTCAGTG	aaatattttcatcgcctcgc	CCTCCTAAGTTTCGAGCTGGACTCAGTGaaatattttcatcgcctcgc	3622	0.4
		CCTCCTAAGTTTCGAGCTGGACTCAGTG	ttgtcttgtctggtatttgt	CCTCCTAAGTTTCGAGCTGGACTCAGTGttgtcttgtctggtatttgt	3754	0.35
		CCTCCTAAGTTTCGAGCTGGACTCAGTG	attatgcagtagatgcttgc	CCTCCTAAGTTTCGAGCTGGACTCAGTGattatgcagtagatgcttgc	3841	0.4
		CCTCCTAAGTTTCGAGCTGGACTCAGTG	acattttctctggttgtgtt	CCTCCTAAGTTTCGAGCTGGACTCAGTGacattttctctggttgtgtt	3864	0.35
		CCTCCTAAGTTTCGAGCTGGACTCAGTG	ctgcttcttggtttgttttt	CCTCCTAAGTTTCGAGCTGGACTCAGTGctgcttcttggtttgttttt	3908	0.35
		CCTCCTAAGTTTCGAGCTGGACTCAGTG	ccatgtttcacaatcacgtt	CCTCCTAAGTTTCGAGCTGGACTCAGTGccatgtttcacaatcacgtt	3934	0.4
		CCTCCTAAGTTTCGAGCTGGACTCAGTG	ggatttgtttgttttcgctg	CCTCCTAAGTTTCGAGCTGGACTCAGTGggatttgtttgttttcgctg	3961	0.4
		CCTCCTAAGTTTCGAGCTGGACTCAGTG	tattatttccaggtgcttgg	CCTCCTAAGTTTCGAGCTGGACTCAGTGtattatttccaggtgcttgg	3993	0.4
intS11
		CCTCCTAAGTTTCGAGCTGGACTCAGTG	ctttttggctagctgatgac	CCTCCTAAGTTTCGAGCTGGACTCAGTGctttttggctagctgatgac	196	0.45
		CCTCCTAAGTTTCGAGCTGGACTCAGTG	gaattgagcacctttctgtt	CCTCCTAAGTTTCGAGCTGGACTCAGTGgaattgagcacctttctgtt	310	0.4
		CCTCCTAAGTTTCGAGCTGGACTCAGTG	gagaagcgggaacaccgaaa	CCTCCTAAGTTTCGAGCTGGACTCAGTGgagaagcgggaacaccgaaa	350	0.55
		CCTCCTAAGTTTCGAGCTGGACTCAGTG	gcctcagaatattgttgttg	CCTCCTAAGTTTCGAGCTGGACTCAGTGgcctcagaatattgttgttg	436	0.4
		CCTCCTAAGTTTCGAGCTGGACTCAGTG	tgctaaaacccgacgcgaaa	CCTCCTAAGTTTCGAGCTGGACTCAGTGtgctaaaacccgacgcgaaa	458	0.5
		CCTCCTAAGTTTCGAGCTGGACTCAGTG	agaggcggcgtaaaacactt	CCTCCTAAGTTTCGAGCTGGACTCAGTGagaggcggcgtaaaacactt	487	0.5
		CCTCCTAAGTTTCGAGCTGGACTCAGTG	cgttttttccacagtcacaa	CCTCCTAAGTTTCGAGCTGGACTCAGTGcgttttttccacagtcacaa	548	0.4
		CCTCCTAAGTTTCGAGCTGGACTCAGTG	cggctatctttggatttgta	CCTCCTAAGTTTCGAGCTGGACTCAGTGcggctatctttggatttgta	586	0.4
		CCTCCTAAGTTTCGAGCTGGACTCAGTG	tcgtatctttacgcgtatca	CCTCCTAAGTTTCGAGCTGGACTCAGTGtcgtatctttacgcgtatca	619	0.4
		CCTCCTAAGTTTCGAGCTGGACTCAGTG	tttgattttcgctgcagttt	CCTCCTAAGTTTCGAGCTGGACTCAGTGtttgattttcgctgcagttt	654	0.35
		CCTCCTAAGTTTCGAGCTGGACTCAGTG	aaccatgttgcacttgtgat	CCTCCTAAGTTTCGAGCTGGACTCAGTGaaccatgttgcacttgtgat	683	0.4
		CCTCCTAAGTTTCGAGCTGGACTCAGTG	gctttagtttactctttgct	CCTCCTAAGTTTCGAGCTGGACTCAGTGgctttagtttactctttgct	732	0.35
		CCTCCTAAGTTTCGAGCTGGACTCAGTG	cctctaagatgcagttactc	CCTCCTAAGTTTCGAGCTGGACTCAGTGcctctaagatgcagttactc	756	0.45
		CCTCCTAAGTTTCGAGCTGGACTCAGTG	tgactcaaagttggttctcc	CCTCCTAAGTTTCGAGCTGGACTCAGTGtgactcaaagttggttctcc	787	0.45
		CCTCCTAAGTTTCGAGCTGGACTCAGTG	gttttcggtgcgataaagct	CCTCCTAAGTTTCGAGCTGGACTCAGTGgttttcggtgcgataaagct	811	0.45
		CCTCCTAAGTTTCGAGCTGGACTCAGTG	catcttgcggggattacttc	CCTCCTAAGTTTCGAGCTGGACTCAGTGcatcttgcggggattacttc	833	0.5
		CCTCCTAAGTTTCGAGCTGGACTCAGTG	ctttcatatccgattccatg	CCTCCTAAGTTTCGAGCTGGACTCAGTGctttcatatccgattccatg	858	0.4
		CCTCCTAAGTTTCGAGCTGGACTCAGTG	aggttcataaggggagctag	CCTCCTAAGTTTCGAGCTGGACTCAGTGaggttcataaggggagctag	958	0.5
		CCTCCTAAGTTTCGAGCTGGACTCAGTG	gtgatgatggtggttgtgat	CCTCCTAAGTTTCGAGCTGGACTCAGTGgtgatgatggtggttgtgat	1013	0.45
		CCTCCTAAGTTTCGAGCTGGACTCAGTG	tgggactcaattcgctggag	CCTCCTAAGTTTCGAGCTGGACTCAGTGtgggactcaattcgctggag	1176	0.55
		CCTCCTAAGTTTCGAGCTGGACTCAGTG	cgatgtcatgtgatggcttc	CCTCCTAAGTTTCGAGCTGGACTCAGTGcgatgtcatgtgatggcttc	1211	0.5
		CCTCCTAAGTTTCGAGCTGGACTCAGTG	ccaaaccatgaacgcattca	CCTCCTAAGTTTCGAGCTGGACTCAGTGccaaaccatgaacgcattca	1397	0.45
		CCTCCTAAGTTTCGAGCTGGACTCAGTG	ttcgagatctccgagttgtg	CCTCCTAAGTTTCGAGCTGGACTCAGTGttcgagatctccgagttgtg	1462	0.5
		CCTCCTAAGTTTCGAGCTGGACTCAGTG	tggtcagcgttttagtcttg	CCTCCTAAGTTTCGAGCTGGACTCAGTGtggtcagcgttttagtcttg	1605	0.45
		CCTCCTAAGTTTCGAGCTGGACTCAGTG	gcgttcatctggtacatatc	CCTCCTAAGTTTCGAGCTGGACTCAGTGgcgttcatctggtacatatc	1816	0.45
		CCTCCTAAGTTTCGAGCTGGACTCAGTG	cattgggcatgtatccattg	CCTCCTAAGTTTCGAGCTGGACTCAGTGcattgggcatgtatccattg	1839	0.45
		CCTCCTAAGTTTCGAGCTGGACTCAGTG	ccatgtaggaggtctgatag	CCTCCTAAGTTTCGAGCTGGACTCAGTGccatgtaggaggtctgatag	1896	0.5
		CCTCCTAAGTTTCGAGCTGGACTCAGTG	catacccgttgttgtacatg	CCTCCTAAGTTTCGAGCTGGACTCAGTGcatacccgttgttgtacatg	1953	0.45
		CCTCCTAAGTTTCGAGCTGGACTCAGTG	atgtggatatatccaggagg	CCTCCTAAGTTTCGAGCTGGACTCAGTGatgtggatatatccaggagg	3111	0.45
		CCTCCTAAGTTTCGAGCTGGACTCAGTG	atcctagggctttagttaat	CCTCCTAAGTTTCGAGCTGGACTCAGTGatcctagggctttagttaat	3148	0.35
		CCTCCTAAGTTTCGAGCTGGACTCAGTG	cctgcttaagaactaaggct	CCTCCTAAGTTTCGAGCTGGACTCAGTGcctgcttaagaactaaggct	3218	0.45
		CCTCCTAAGTTTCGAGCTGGACTCAGTG	actctgccacttcgaaattc	CCTCCTAAGTTTCGAGCTGGACTCAGTGactctgccacttcgaaattc	3246	0.45
		CCTCCTAAGTTTCGAGCTGGACTCAGTG	tgtggtacaacagtgcgtat	CCTCCTAAGTTTCGAGCTGGACTCAGTGtgtggtacaacagtgcgtat	3325	0.45
		CCTCCTAAGTTTCGAGCTGGACTCAGTG	gcaagtgagttgtcatctta	CCTCCTAAGTTTCGAGCTGGACTCAGTGgcaagtgagttgtcatctta	3349	0.4
		CCTCCTAAGTTTCGAGCTGGACTCAGTG	tcgaagcagaacggtatgga	CCTCCTAAGTTTCGAGCTGGACTCAGTGtcgaagcagaacggtatgga	3371	0.5
		CCTCCTAAGTTTCGAGCTGGACTCAGTG	ttagctatgcaacaagcggg	CCTCCTAAGTTTCGAGCTGGACTCAGTGttagctatgcaacaagcggg	3404	0.5
		CCTCCTAAGTTTCGAGCTGGACTCAGTG	ccgtaattggcaacagttta	CCTCCTAAGTTTCGAGCTGGACTCAGTGccgtaattggcaacagttta	3443	0.4
		CCTCCTAAGTTTCGAGCTGGACTCAGTG	acgaatttgttgttgttgcc	CCTCCTAAGTTTCGAGCTGGACTCAGTGacgaatttgttgttgttgcc	3470	0.4
		CCTCCTAAGTTTCGAGCTGGACTCAGTG	ttgctcccttcaattgaacg	CCTCCTAAGTTTCGAGCTGGACTCAGTGttgctcccttcaattgaacg	3554	0.45
		CCTCCTAAGTTTCGAGCTGGACTCAGTG	ctgcctttactcctactaaa	CCTCCTAAGTTTCGAGCTGGACTCAGTGctgcctttactcctactaaa	3597	0.4
		CCTCCTAAGTTTCGAGCTGGACTCAGTG	aaatattttcatcgcctcgc	CCTCCTAAGTTTCGAGCTGGACTCAGTGaaatattttcatcgcctcgc	3622	0.4
		CCTCCTAAGTTTCGAGCTGGACTCAGTG	ttgtcttgtctggtatttgt	CCTCCTAAGTTTCGAGCTGGACTCAGTGttgtcttgtctggtatttgt	3754	0.35
		CCTCCTAAGTTTCGAGCTGGACTCAGTG	attatgcagtagatgcttgc	CCTCCTAAGTTTCGAGCTGGACTCAGTGattatgcagtagatgcttgc	3841	0.4
		CCTCCTAAGTTTCGAGCTGGACTCAGTG	acattttctctggttgtgtt	CCTCCTAAGTTTCGAGCTGGACTCAGTGacattttctctggttgtgtt	3864	0.35
		CCTCCTAAGTTTCGAGCTGGACTCAGTG	ctgcttcttggtttgttttt	CCTCCTAAGTTTCGAGCTGGACTCAGTGctgcttcttggtttgttttt	3908	0.35
		CCTCCTAAGTTTCGAGCTGGACTCAGTG	ccatgtttcacaatcacgtt	CCTCCTAAGTTTCGAGCTGGACTCAGTGccatgtttcacaatcacgtt	3934	0.4
		CCTCCTAAGTTTCGAGCTGGACTCAGTG	ggatttgtttgttttcgctg	CCTCCTAAGTTTCGAGCTGGACTCAGTGggatttgtttgttttcgctg	3961	0.4
		CCTCCTAAGTTTCGAGCTGGACTCAGTG	tattatttccaggtgcttgg	CCTCCTAAGTTTCGAGCTGGACTCAGTGtattatttccaggtgcttgg	3993	0.4
Vps29
		CCTCCTAAGTTTCGAGCTGGACTCAGTG	ggtggctgcgataacgataa	CCTCCTAAGTTTCGAGCTGGACTCAGTGggtggctgcgataacgataa	10	0.5
		CCTCCTAAGTTTCGAGCTGGACTCAGTG	aaattgtgaaacgcccagcg	CCTCCTAAGTTTCGAGCTGGACTCAGTGaaattgtgaaacgcccagcg	42	0.5
		CCTCCTAAGTTTCGAGCTGGACTCAGTG	tgaagctttgttgtgtttcc	CCTCCTAAGTTTCGAGCTGGACTCAGTGtgaagctttgttgtgtttcc	67	0.4
		CCTCCTAAGTTTCGAGCTGGACTCAGTG	cgagtaccagaacgagcatc	CCTCCTAAGTTTCGAGCTGGACTCAGTGcgagtaccagaacgagcatc	97	0.55
		CCTCCTAAGTTTCGAGCTGGACTCAGTG	cttcttaaatttagccggca	CCTCCTAAGTTTCGAGCTGGACTCAGTGcttcttaaatttagccggca	150	0.4
		CCTCCTAAGTTTCGAGCTGGACTCAGTG	tggccaggatgtgatgtatg	CCTCCTAAGTTTCGAGCTGGACTCAGTGtggccaggatgtgatgtatg	187	0.5
		CCTCCTAAGTTTCGAGCTGGACTCAGTG	actccttggtgcagatgttt	CCTCCTAAGTTTCGAGCTGGACTCAGTGactccttggtgcagatgttt	211	0.45
		CCTCCTAAGTTTCGAGCTGGACTCAGTG	agggacttcaggtagtcgta	CCTCCTAAGTTTCGAGCTGGACTCAGTGagggacttcaggtagtcgta	233	0.5
		CCTCCTAAGTTTCGAGCTGGACTCAGTG	gcactatgtgcacatcattg	CCTCCTAAGTTTCGAGCTGGACTCAGTGgcactatgtgcacatcattg	256	0.45
		CCTCCTAAGTTTCGAGCTGGACTCAGTG	tacgtcaggttctcgtcgaa	CCTCCTAAGTTTCGAGCTGGACTCAGTGtacgtcaggttctcgtcgaa	284	0.5
		CCTCCTAAGTTTCGAGCTGGACTCAGTG	cacagaccgatccggaactg	CCTCCTAAGTTTCGAGCTGGACTCAGTGcacagaccgatccggaactg	332	0.6
		CCTCCTAAGTTTCGAGCTGGACTCAGTG	gtgatcaggatgtccacgtc	CCTCCTAAGTTTCGAGCTGGACTCAGTGgtgatcaggatgtccacgtc	416	0.55
		CCTCCTAAGTTTCGAGCTGGACTCAGTG	gtaggcctcgaacttgtacg	CCTCCTAAGTTTCGAGCTGGACTCAGTGgtaggcctcgaacttgtacg	444	0.55
		CCTCCTAAGTTTCGAGCTGGACTCAGTG	gatcccggattgatgtagaa	CCTCCTAAGTTTCGAGCTGGACTCAGTGgatcccggattgatgtagaa	479	0.45
		CCTCCTAAGTTTCGAGCTGGACTCAGTG	cgaacgaaggcaccacattg	CCTCCTAAGTTTCGAGCTGGACTCAGTGcgaacgaaggcaccacattg	529	0.55
		CCTCCTAAGTTTCGAGCTGGACTCAGTG	gtgctctgaatgtccatcag	CCTCCTAAGTTTCGAGCTGGACTCAGTGgtgctctgaatgtccatcag	551	0.5
		CCTCCTAAGTTTCGAGCTGGACTCAGTG	agttggtacacgtacgtgac	CCTCCTAAGTTTCGAGCTGGACTCAGTGagttggtacacgtacgtgac	578	0.5
		CCTCCTAAGTTTCGAGCTGGACTCAGTG	ttcttgtactcgatgcgctc	CCTCCTAAGTTTCGAGCTGGACTCAGTGttcttgtactcgatgcgctc	620	0.5
		CCTCCTAAGTTTCGAGCTGGACTCAGTG	gctaatactaggaccctaga	CCTCCTAAGTTTCGAGCTGGACTCAGTGgctaatactaggaccctaga	642	0.45
		CCTCCTAAGTTTCGAGCTGGACTCAGTG	gattggaggggaatggctgg	CCTCCTAAGTTTCGAGCTGGACTCAGTGgattggaggggaatggctgg	664	0.6
		CCTCCTAAGTTTCGAGCTGGACTCAGTG	agaatgcaggggtcaagggt	CCTCCTAAGTTTCGAGCTGGACTCAGTGagaatgcaggggtcaagggt	686	0.55
		CCTCCTAAGTTTCGAGCTGGACTCAGTG	tttctttaatgaagccgagc	CCTCCTAAGTTTCGAGCTGGACTCAGTGtttctttaatgaagccgagc	708	0.4
		CCTCCTAAGTTTCGAGCTGGACTCAGTG	cttgatttattgctacgtac	CCTCCTAAGTTTCGAGCTGGACTCAGTGcttgatttattgctacgtac	736	0.35
		CCTCCTAAGTTTCGAGCTGGACTCAGTG	ggtgctagcattttttatca	CCTCCTAAGTTTCGAGCTGGACTCAGTGggtgctagcattttttatca	772	0.35
		CCTCCTAAGTTTCGAGCTGGACTCAGTG	ccgttcgtacttttattctc	CCTCCTAAGTTTCGAGCTGGACTCAGTGccgttcgtacttttattctc	803	0.4
		CCTCCTAAGTTTCGAGCTGGACTCAGTG	ccttactttgtaatcgttta	CCTCCTAAGTTTCGAGCTGGACTCAGTGccttactttgtaatcgttta	855	0.3
		CCTCCTAAGTTTCGAGCTGGACTCAGTG	cacaatttctgggggtgttt	CCTCCTAAGTTTCGAGCTGGACTCAGTGcacaatttctgggggtgttt	877	0.45
		CCTCCTAAGTTTCGAGCTGGACTCAGTG	tatcagattattgtgggagt	CCTCCTAAGTTTCGAGCTGGACTCAGTGtatcagattattgtgggagt	899	0.35
		CCTCCTAAGTTTCGAGCTGGACTCAGTG	ctcgatcatcagatgtaact	CCTCCTAAGTTTCGAGCTGGACTCAGTGctcgatcatcagatgtaact	956	0.4
		CCTCCTAAGTTTCGAGCTGGACTCAGTG	cgaacttttgagcagactct	CCTCCTAAGTTTCGAGCTGGACTCAGTGcgaacttttgagcagactct	979	0.45
CG8778
		CCTCCTAAGTTTCGAGCTGGACTCAGTG	aacgaccggcagaaaacagc	CCTCCTAAGTTTCGAGCTGGACTCAGTGaacgaccggcagaaaacagc	7	0.55
		CCTCCTAAGTTTCGAGCTGGACTCAGTG	accagacgctctttttatta	CCTCCTAAGTTTCGAGCTGGACTCAGTGaccagacgctctttttatta	93	0.35
		CCTCCTAAGTTTCGAGCTGGACTCAGTG	aacaagtggccgggctaact	CCTCCTAAGTTTCGAGCTGGACTCAGTGaacaagtggccgggctaact	123	0.55
		CCTCCTAAGTTTCGAGCTGGACTCAGTG	ccgacgccaaattacgtgat	CCTCCTAAGTTTCGAGCTGGACTCAGTGccgacgccaaattacgtgat	145	0.5
		CCTCCTAAGTTTCGAGCTGGACTCAGTG	cacgagaacttcagttccat	CCTCCTAAGTTTCGAGCTGGACTCAGTGcacgagaacttcagttccat	180	0.45
		CCTCCTAAGTTTCGAGCTGGACTCAGTG	aataactgagataccctgcc	CCTCCTAAGTTTCGAGCTGGACTCAGTGaataactgagataccctgcc	219	0.45
		CCTCCTAAGTTTCGAGCTGGACTCAGTG	tttgctgctggtcggtttag	CCTCCTAAGTTTCGAGCTGGACTCAGTGtttgctgctggtcggtttag	242	0.5
		CCTCCTAAGTTTCGAGCTGGACTCAGTG	cattccccggctaaaggaat	CCTCCTAAGTTTCGAGCTGGACTCAGTGcattccccggctaaaggaat	264	0.5
		CCTCCTAAGTTTCGAGCTGGACTCAGTG	aggacatcgttgaaggtctc	CCTCCTAAGTTTCGAGCTGGACTCAGTGaggacatcgttgaaggtctc	287	0.5
		CCTCCTAAGTTTCGAGCTGGACTCAGTG	cgatccattatccttcttta	CCTCCTAAGTTTCGAGCTGGACTCAGTGcgatccattatccttcttta	315	0.35
		CCTCCTAAGTTTCGAGCTGGACTCAGTG	cagactcctcaatacaacca	CCTCCTAAGTTTCGAGCTGGACTCAGTGcagactcctcaatacaacca	339	0.45
		CCTCCTAAGTTTCGAGCTGGACTCAGTG	cggcacagaagattccaggg	CCTCCTAAGTTTCGAGCTGGACTCAGTGcggcacagaagattccaggg	361	0.6
		CCTCCTAAGTTTCGAGCTGGACTCAGTG	ccttttcgctctttcaaatc	CCTCCTAAGTTTCGAGCTGGACTCAGTGccttttcgctctttcaaatc	386	0.4
		CCTCCTAAGTTTCGAGCTGGACTCAGTG	ccctgagctcttttacaaat	CCTCCTAAGTTTCGAGCTGGACTCAGTGccctgagctcttttacaaat	430	0.4
		CCTCCTAAGTTTCGAGCTGGACTCAGTG	ctgctcaatggcaataagca	CCTCCTAAGTTTCGAGCTGGACTCAGTGctgctcaatggcaataagca	453	0.45
		CCTCCTAAGTTTCGAGCTGGACTCAGTG	catcttcgtgtcgctagcag	CCTCCTAAGTTTCGAGCTGGACTCAGTGcatcttcgtgtcgctagcag	558	0.55
		CCTCCTAAGTTTCGAGCTGGACTCAGTG	tatgatggctaaccttgtct	CCTCCTAAGTTTCGAGCTGGACTCAGTGtatgatggctaaccttgtct	588	0.4
		CCTCCTAAGTTTCGAGCTGGACTCAGTG	cagagcaggggacagaatgc	CCTCCTAAGTTTCGAGCTGGACTCAGTGcagagcaggggacagaatgc	639	0.6
		CCTCCTAAGTTTCGAGCTGGACTCAGTG	gccgtgaaaatgagttcttt	CCTCCTAAGTTTCGAGCTGGACTCAGTGgccgtgaaaatgagttcttt	662	0.4
		CCTCCTAAGTTTCGAGCTGGACTCAGTG	ctctgctccgttaaacactc	CCTCCTAAGTTTCGAGCTGGACTCAGTGctctgctccgttaaacactc	684	0.5
		CCTCCTAAGTTTCGAGCTGGACTCAGTG	ttaaccagacccagatcttt	CCTCCTAAGTTTCGAGCTGGACTCAGTGttaaccagacccagatcttt	707	0.4
		CCTCCTAAGTTTCGAGCTGGACTCAGTG	gtttcgttctgtttcactac	CCTCCTAAGTTTCGAGCTGGACTCAGTGgtttcgttctgtttcactac	731	0.4
		CCTCCTAAGTTTCGAGCTGGACTCAGTG	tttaagtgcctgctgatagg	CCTCCTAAGTTTCGAGCTGGACTCAGTGtttaagtgcctgctgatagg	762	0.45
		CCTCCTAAGTTTCGAGCTGGACTCAGTG	attcgggagaatttcctctg	CCTCCTAAGTTTCGAGCTGGACTCAGTGattcgggagaatttcctctg	786	0.45
		CCTCCTAAGTTTCGAGCTGGACTCAGTG	cttgtcaatggccagtttgg	CCTCCTAAGTTTCGAGCTGGACTCAGTGcttgtcaatggccagtttgg	828	0.5
		CCTCCTAAGTTTCGAGCTGGACTCAGTG	gagtagcagatctcttcgat	CCTCCTAAGTTTCGAGCTGGACTCAGTGgagtagcagatctcttcgat	881	0.45
		CCTCCTAAGTTTCGAGCTGGACTCAGTG	aacgatccttagtgggtatc	CCTCCTAAGTTTCGAGCTGGACTCAGTGaacgatccttagtgggtatc	907	0.45
		CCTCCTAAGTTTCGAGCTGGACTCAGTG	ttctcggcaaaggcagcgag	CCTCCTAAGTTTCGAGCTGGACTCAGTGttctcggcaaaggcagcgag	935	0.6
		CCTCCTAAGTTTCGAGCTGGACTCAGTG	cacgatatctatttactccc	CCTCCTAAGTTTCGAGCTGGACTCAGTGcacgatatctatttactccc	975	0.4
		CCTCCTAAGTTTCGAGCTGGACTCAGTG	tcagcttaacgttaggggag	CCTCCTAAGTTTCGAGCTGGACTCAGTGtcagcttaacgttaggggag	998	0.5
		CCTCCTAAGTTTCGAGCTGGACTCAGTG	ccgcttaagtgtttctacaa	CCTCCTAAGTTTCGAGCTGGACTCAGTGccgcttaagtgtttctacaa	1048	0.4
		CCTCCTAAGTTTCGAGCTGGACTCAGTG	agctcgataggatcgaatgc	CCTCCTAAGTTTCGAGCTGGACTCAGTGagctcgataggatcgaatgc	1098	0.5
phgpx
		CCTCCTAAGTTTCGAGCTGGACTCAGTG	tgaaaccggcgacttgcaaa	CCTCCTAAGTTTCGAGCTGGACTCAGTGtgaaaccggcgacttgcaaa	19	0.5
		CCTCCTAAGTTTCGAGCTGGACTCAGTG	ttctcactttcgaagcgtaa	CCTCCTAAGTTTCGAGCTGGACTCAGTGttctcactttcgaagcgtaa	46	0.4
		CCTCCTAAGTTTCGAGCTGGACTCAGTG	atgactaatggaactgggca	CCTCCTAAGTTTCGAGCTGGACTCAGTGatgactaatggaactgggca	68	0.45
		CCTCCTAAGTTTCGAGCTGGACTCAGTG	gcctgagactcattctttaa	CCTCCTAAGTTTCGAGCTGGACTCAGTGgcctgagactcattctttaa	107	0.4
		CCTCCTAAGTTTCGAGCTGGACTCAGTG	ctggcgggaaatgttctgaa	CCTCCTAAGTTTCGAGCTGGACTCAGTGctggcgggaaatgttctgaa	130	0.5
		CCTCCTAAGTTTCGAGCTGGACTCAGTG	ctcatcgagtagcacctgag	CCTCCTAAGTTTCGAGCTGGACTCAGTGctcatcgagtagcacctgag	153	0.55
		CCTCCTAAGTTTCGAGCTGGACTCAGTG	gaagcatgatggtgcagagg	CCTCCTAAGTTTCGAGCTGGACTCAGTGgaagcatgatggtgcagagg	227	0.55
		CCTCCTAAGTTTCGAGCTGGACTCAGTG	ctgaggagatggcgttcatg	CCTCCTAAGTTTCGAGCTGGACTCAGTGctgaggagatggcgttcatg	269	0.55
		CCTCCTAAGTTTCGAGCTGGACTCAGTG	agacatgtcgatggcagctg	CCTCCTAAGTTTCGAGCTGGACTCAGTGagacatgtcgatggcagctg	307	0.55
		CCTCCTAAGTTTCGAGCTGGACTCAGTG	cgttcttgtaatctccgtta	CCTCCTAAGTTTCGAGCTGGACTCAGTGcgttcttgtaatctccgtta	329	0.4
		CCTCCTAAGTTTCGAGCTGGACTCAGTG	cacggtgaactcgtagatcg	CCTCCTAAGTTTCGAGCTGGACTCAGTGcacggtgaactcgtagatcg	355	0.55
		CCTCCTAAGTTTCGAGCTGGACTCAGTG	cttttccagggaaacatcgt	CCTCCTAAGTTTCGAGCTGGACTCAGTGcttttccagggaaacatcgt	391	0.45
		CCTCCTAAGTTTCGAGCTGGACTCAGTG	cacttggaggcgatgttcac	CCTCCTAAGTTTCGAGCTGGACTCAGTGcacttggaggcgatgttcac	435	0.55
		CCTCCTAAGTTTCGAGCTGGACTCAGTG	tcgtagttgttcttggtcag	CCTCCTAAGTTTCGAGCTGGACTCAGTGtcgtagttgttcttggtcag	459	0.45
		CCTCCTAAGTTTCGAGCTGGACTCAGTG	ccgtacttctcctttagatc	CCTCCTAAGTTTCGAGCTGGACTCAGTGccgtacttctcctttagatc	489	0.45
		CCTCCTAAGTTTCGAGCTGGACTCAGTG	ggaagttgaggatcaccagg	CCTCCTAAGTTTCGAGCTGGACTCAGTGggaagttgaggatcaccagg	518	0.55
		CCTCCTAAGTTTCGAGCTGGACTCAGTG	atctgggacccaaactgatt	CCTCCTAAGTTTCGAGCTGGACTCAGTGatctgggacccaaactgatt	543	0.45
		CCTCCTAAGTTTCGAGCTGGACTCAGTG	attgtctccattcacatcga	CCTCCTAAGTTTCGAGCTGGACTCAGTGattgtctccattcacatcga	640	0.4
		CCTCCTAAGTTTCGAGCTGGACTCAGTG	ttggcctttaggtatttgta	CCTCCTAAGTTTCGAGCTGGACTCAGTGttggcctttaggtatttgta	672	0.35
		CCTCCTAAGTTTCGAGCTGGACTCAGTG	tgaagttccacttgattccg	CCTCCTAAGTTTCGAGCTGGACTCAGTGtgaagttccacttgattccg	713	0.45
		CCTCCTAAGTTTCGAGCTGGACTCAGTG	tccttgttcaccagaaactt	CCTCCTAAGTTTCGAGCTGGACTCAGTGtccttgttcaccagaaactt	735	0.4
		CCTCCTAAGTTTCGAGCTGGACTCAGTG	catatcggttgatgggcacg	CCTCCTAAGTTTCGAGCTGGACTCAGTGcatatcggttgatgggcacg	758	0.55
		CCTCCTAAGTTTCGAGCTGGACTCAGTG	tttcaatgtccttggcgatg	CCTCCTAAGTTTCGAGCTGGACTCAGTGtttcaatgtccttggcgatg	800	0.45
		CCTCCTAAGTTTCGAGCTGGACTCAGTG	cgtctagggcacatctacag	CCTCCTAAGTTTCGAGCTGGACTCAGTGcgtctagggcacatctacag	825	0.55
		CCTCCTAAGTTTCGAGCTGGACTCAGTG	acacagtccaaaagagcagc	CCTCCTAAGTTTCGAGCTGGACTCAGTGacacagtccaaaagagcagc	848	0.5
		CCTCCTAAGTTTCGAGCTGGACTCAGTG	tacaagctaaagctacgcga	CCTCCTAAGTTTCGAGCTGGACTCAGTGtacaagctaaagctacgcga	870	0.45
		CCTCCTAAGTTTCGAGCTGGACTCAGTG	aagactatctgtggccagac	CCTCCTAAGTTTCGAGCTGGACTCAGTGaagactatctgtggccagac	893	0.5
		CCTCCTAAGTTTCGAGCTGGACTCAGTG	atataccatgcggtgcatgt	CCTCCTAAGTTTCGAGCTGGACTCAGTGatataccatgcggtgcatgt	923	0.45
		CCTCCTAAGTTTCGAGCTGGACTCAGTG	accagtaaggagtagacaat	CCTCCTAAGTTTCGAGCTGGACTCAGTGaccagtaaggagtagacaat	945	0.4
		CCTCCTAAGTTTCGAGCTGGACTCAGTG	ttatgtttgcgggtgggaat	CCTCCTAAGTTTCGAGCTGGACTCAGTGttatgtttgcgggtgggaat	969	0.45
		CCTCCTAAGTTTCGAGCTGGACTCAGTG	tgtggtaaccacgaatggcg	CCTCCTAAGTTTCGAGCTGGACTCAGTGtgtggtaaccacgaatggcg	993	0.55
CG15093
		CCTCCTAAGTTTCGAGCTGGACTCAGTG	ctgtcagaagcacactgctc	CCTCCTAAGTTTCGAGCTGGACTCAGTGctgtcagaagcacactgctc	2	0.55
		CCTCCTAAGTTTCGAGCTGGACTCAGTG	aaagttctacgtgatcggac	CCTCCTAAGTTTCGAGCTGGACTCAGTGaaagttctacgtgatcggac	24	0.45
		CCTCCTAAGTTTCGAGCTGGACTCAGTG	aggggatacggctgaaactg	CCTCCTAAGTTTCGAGCTGGACTCAGTGaggggatacggctgaaactg	46	0.55
		CCTCCTAAGTTTCGAGCTGGACTCAGTG	ccacctgttggtgtaagaaa	CCTCCTAAGTTTCGAGCTGGACTCAGTGccacctgttggtgtaagaaa	70	0.45
		CCTCCTAAGTTTCGAGCTGGACTCAGTG	aaataggcaactagccacca	CCTCCTAAGTTTCGAGCTGGACTCAGTGaaataggcaactagccacca	98	0.45
		CCTCCTAAGTTTCGAGCTGGACTCAGTG	gcgaaaagttctacagtgtt	CCTCCTAAGTTTCGAGCTGGACTCAGTGgcgaaaagttctacagtgtt	131	0.4
		CCTCCTAAGTTTCGAGCTGGACTCAGTG	acatcacacggagcgacatg	CCTCCTAAGTTTCGAGCTGGACTCAGTGacatcacacggagcgacatg	154	0.55
		CCTCCTAAGTTTCGAGCTGGACTCAGTG	cacgaagccgatgttcttgg	CCTCCTAAGTTTCGAGCTGGACTCAGTGcacgaagccgatgttcttgg	237	0.55
		CCTCCTAAGTTTCGAGCTGGACTCAGTG	tgattagattgctggccatg	CCTCCTAAGTTTCGAGCTGGACTCAGTGtgattagattgctggccatg	280	0.45
		CCTCCTAAGTTTCGAGCTGGACTCAGTG	gggcttggagatatcgaaga	CCTCCTAAGTTTCGAGCTGGACTCAGTGgggcttggagatatcgaaga	321	0.5
		CCTCCTAAGTTTCGAGCTGGACTCAGTG	cacaaagtccgagttcttgg	CCTCCTAAGTTTCGAGCTGGACTCAGTGcacaaagtccgagttcttgg	399	0.5
		CCTCCTAAGTTTCGAGCTGGACTCAGTG	atccacaatggcattgttcg	CCTCCTAAGTTTCGAGCTGGACTCAGTGatccacaatggcattgttcg	432	0.45
		CCTCCTAAGTTTCGAGCTGGACTCAGTG	cagtcatctcatcgtaggag	CCTCCTAAGTTTCGAGCTGGACTCAGTGcagtcatctcatcgtaggag	454	0.5
		CCTCCTAAGTTTCGAGCTGGACTCAGTG	aagatggtgtccttgttgac	CCTCCTAAGTTTCGAGCTGGACTCAGTGaagatggtgtccttgttgac	482	0.45
		CCTCCTAAGTTTCGAGCTGGACTCAGTG	cgagatcgtcgacgagtcaa	CCTCCTAAGTTTCGAGCTGGACTCAGTGcgagatcgtcgacgagtcaa	504	0.55
		CCTCCTAAGTTTCGAGCTGGACTCAGTG	cttcttctgcaacgacttga	CCTCCTAAGTTTCGAGCTGGACTCAGTGcttcttctgcaacgacttga	534	0.45
		CCTCCTAAGTTTCGAGCTGGACTCAGTG	ggaaacgggggcatcgataa	CCTCCTAAGTTTCGAGCTGGACTCAGTGggaaacgggggcatcgataa	576	0.55
		CCTCCTAAGTTTCGAGCTGGACTCAGTG	caccatgaaggtgagggtgg	CCTCCTAAGTTTCGAGCTGGACTCAGTGcaccatgaaggtgagggtgg	621	0.6
		CCTCCTAAGTTTCGAGCTGGACTCAGTG	cttgacggcattgtactccg	CCTCCTAAGTTTCGAGCTGGACTCAGTGcttgacggcattgtactccg	654	0.55
		CCTCCTAAGTTTCGAGCTGGACTCAGTG	cgcagtgggtgatcttcttg	CCTCCTAAGTTTCGAGCTGGACTCAGTGcgcagtgggtgatcttcttg	694	0.55
		CCTCCTAAGTTTCGAGCTGGACTCAGTG	agcatcatgttgttgcacag	CCTCCTAAGTTTCGAGCTGGACTCAGTGagcatcatgttgttgcacag	743	0.45
		CCTCCTAAGTTTCGAGCTGGACTCAGTG	ccgaaacaccgatcatcgag	CCTCCTAAGTTTCGAGCTGGACTCAGTGccgaaacaccgatcatcgag	769	0.55
		CCTCCTAAGTTTCGAGCTGGACTCAGTG	aagacattggcatcgagacc	CCTCCTAAGTTTCGAGCTGGACTCAGTGaagacattggcatcgagacc	815	0.5
		CCTCCTAAGTTTCGAGCTGGACTCAGTG	gtggaggagttgatgatctc	CCTCCTAAGTTTCGAGCTGGACTCAGTGgtggaggagttgatgatctc	839	0.5
		CCTCCTAAGTTTCGAGCTGGACTCAGTG	cagggttgtagatctccgag	CCTCCTAAGTTTCGAGCTGGACTCAGTGcagggttgtagatctccgag	874	0.55
		CCTCCTAAGTTTCGAGCTGGACTCAGTG	gatcagagccgaggagaaac	CCTCCTAAGTTTCGAGCTGGACTCAGTGgatcagagccgaggagaaac	942	0.55
		CCTCCTAAGTTTCGAGCTGGACTCAGTG	cgggatgggtgagttggaag	CCTCCTAAGTTTCGAGCTGGACTCAGTGcgggatgggtgagttggaag	999	0.6
		CCTCCTAAGTTTCGAGCTGGACTCAGTG	tatcgcacagcgactggtag	CCTCCTAAGTTTCGAGCTGGACTCAGTGtatcgcacagcgactggtag	1042	0.55
		CCTCCTAAGTTTCGAGCTGGACTCAGTG	cacggagaagtccttgttgc	CCTCCTAAGTTTCGAGCTGGACTCAGTGcacggagaagtccttgttgc	1071	0.55
		CCTCCTAAGTTTCGAGCTGGACTCAGTG	ccttcttcatcaggtcgtac	CCTCCTAAGTTTCGAGCTGGACTCAGTGccttcttcatcaggtcgtac	1093	0.5
		CCTCCTAAGTTTCGAGCTGGACTCAGTG	gtaacctaaacgctgaactt	CCTCCTAAGTTTCGAGCTGGACTCAGTGgtaacctaaacgctgaactt	1115	0.4
		CCTCCTAAGTTTCGAGCTGGACTCAGTG	caccacaacctgtagtctgt	CCTCCTAAGTTTCGAGCTGGACTCAGTGcaccacaacctgtagtctgt	1137	0.5
		CCTCCTAAGTTTCGAGCTGGACTCAGTG	gtggacatgacgtggttgtg	CCTCCTAAGTTTCGAGCTGGACTCAGTGgtggacatgacgtggttgtg	1159	0.55
		CCTCCTAAGTTTCGAGCTGGACTCAGTG	taaatgcaggactggtttgg	CCTCCTAAGTTTCGAGCTGGACTCAGTGtaaatgcaggactggtttgg	1181	0.45
		CCTCCTAAGTTTCGAGCTGGACTCAGTG	agagggaacttagtgctata	CCTCCTAAGTTTCGAGCTGGACTCAGTGagagggaacttagtgctata	1203	0.4
		CCTCCTAAGTTTCGAGCTGGACTCAGTG	gcatagaacagggaacagtc	CCTCCTAAGTTTCGAGCTGGACTCAGTGgcatagaacagggaacagtc	1240	0.5
		CCTCCTAAGTTTCGAGCTGGACTCAGTG	tcactcaatacgatacgtct	CCTCCTAAGTTTCGAGCTGGACTCAGTGtcactcaatacgatacgtct	1282	0.4

## Sheet: Probes only
Kanca et al. 2021 Supplementary file 3. smiFISH probes
GAL4
GAL4-1	CCTCCTAAGTTTCGAGCTGGACTCAGTGttcttcaggcggcagatatc
GAL4-2	CCTCCTAAGTTTCGAGCTGGACTCAGTGagttgttcttcaggcacttg
GAL4-3	CCTCCTAAGTTTCGAGCTGGACTCAGTGggaagatcagcaggaacagc
GAL4-4	CCTCCTAAGTTTCGAGCTGGACTCAGTGtcttcaggatcatatccaga
GAL4-5	CCTCCTAAGTTTCGAGCTGGACTCAGTGttgatatcctgcaggctatc
GAL4-6	CCTCCTAAGTTTCGAGCTGGACTCAGTGacgttatcctgcacgaacag
GAL4-7	CCTCCTAAGTTTCGAGCTGGACTCAGTGctatcgatgctcacggtcag
GAL4-8	CCTCCTAAGTTTCGAGCTGGACTCAGTGcatgaaatccagggggatgg
GAL4-9	CCTCCTAAGTTTCGAGCTGGACTCAGTGatcggttttcaggaagggca
GAL4-10	CCTCCTAAGTTTCGAGCTGGACTCAGTGcgaagaagccgttgttgttg
GAL4-11	CCTCCTAAGTTTCGAGCTGGACTCAGTGtgtagttctcgggcttgaag
GAL4-12	CCTCCTAAGTTTCGAGCTGGACTCAGTGtgtagcgatcggtgatcatg
GAL4-13	CCTCCTAAGTTTCGAGCTGGACTCAGTGaagttgttcaggtagctctg
GAL4-14	CCTCCTAAGTTTCGAGCTGGACTCAGTGgttgttgtacagcatcatca
GAL4-15	CCTCCTAAGTTTCGAGCTGGACTCAGTGcaggatgcagttgaacagga
GAL4-16	CCTCCTAAGTTTCGAGCTGGACTCAGTGcatcgatatcggtgctctcg
GAL4-17	CCTCCTAAGTTTCGAGCTGGACTCAGTGttggcgttctggtagtagaa
GAL4-18	CCTCCTAAGTTTCGAGCTGGACTCAGTGtcgaacaccttgctggtcag
GAL4-19	CCTCCTAAGTTTCGAGCTGGACTCAGTGtagctggtgttggtcttttg
GAL4-20	CCTCCTAAGTTTCGAGCTGGACTCAGTGgatgctgaagctgtggaagt
GAL4-21	CCTCCTAAGTTTCGAGCTGGACTCAGTGggatgctgctatcgctgaag
GAL4-22	CCTCCTAAGTTTCGAGCTGGACTCAGTGggaagctgatggtgttctgg
GAL4-23	CCTCCTAAGTTTCGAGCTGGACTCAGTGcgatgatgccgtggtagatg
GAL4-24	CCTCCTAAGTTTCGAGCTGGACTCAGTGcgtagatcttggtgaacacc
GAL4-25	CCTCCTAAGTTTCGAGCTGGACTCAGTGatctcgttgcagatcatcag
GAL4-26	CCTCCTAAGTTTCGAGCTGGACTCAGTGtatccatctgcaggaacttg
GAL4-27	CCTCCTAAGTTTCGAGCTGGACTCAGTGtcgaagcgggtgaagctcag
GAL4-28	CCTCCTAAGTTTCGAGCTGGACTCAGTGaagaaatcgcgcagcacgta
GAL4-29	CCTCCTAAGTTTCGAGCTGGACTCAGTGtcttcttctgggtgaagttg
GAL4-30	CCTCCTAAGTTTCGAGCTGGACTCAGTGctctggtgatcgttctgatc
GAL4-31	CCTCCTAAGTTTCGAGCTGGACTCAGTGcatcgctcagcatgatgctg
GAL4-32	CCTCCTAAGTTTCGAGCTGGACTCAGTGttatccatgtagctgctcac
GAL4-33	CCTCCTAAGTTTCGAGCTGGACTCAGTGcgaagtagggggtcacgttg
GAL4-34	CCTCCTAAGTTTCGAGCTGGACTCAGTGtgaacaggtagtagctgcag
GAL4-35	CCTCCTAAGTTTCGAGCTGGACTCAGTGatcagcacggtgttgatctg
GAL4-36	CCTCCTAAGTTTCGAGCTGGACTCAGTGaggtctggatcttgaaggtg
GAL4-37	CCTCCTAAGTTTCGAGCTGGACTCAGTGagcacctggatgtacttctc
GAL4-38	CCTCCTAAGTTTCGAGCTGGACTCAGTGctgttgttgtagctgatgtg
GAL4-39	CCTCCTAAGTTTCGAGCTGGACTCAGTGcacgatgttcttgatggcgc
GAL4-40	CCTCCTAAGTTTCGAGCTGGACTCAGTGtacttcacgctgatgttgtt
GAL4-41	CCTCCTAAGTTTCGAGCTGGACTCAGTGtcaccagatcgctgaagctg
GAL4-42	CCTCCTAAGTTTCGAGCTGGACTCAGTGtgttggtgaaggtgaagctc
GAL4-43	CCTCCTAAGTTTCGAGCTGGACTCAGTGtctgggtggtgatcaggttg
GAL4-44	CCTCCTAAGTTTCGAGCTGGACTCAGTGcatgaagttatcgtgcacgt
GAL4-45	CCTCCTAAGTTTCGAGCTGGACTCAGTGtgttgccatcatcgatcttg
GAL4-46	CCTCCTAAGTTTCGAGCTGGACTCAGTGtgaacatgccggtggtgatg
GAL4-47	CCTCCTAAGTTTCGAGCTGGACTCAGTGtgtacacatcatccatggtg
GAL4-48	CCTCCTAAGTTTCGAGCTGGACTCAGTGggtatcctcatcatcgaaca
Setx
Setx_1	CCTCCTAAGTTTCGAGCTGGACTCAGTGcgaaggtgttctggtattca
Setx_2	CCTCCTAAGTTTCGAGCTGGACTCAGTGaagattatcctgcaacgcga
Setx_3	CCTCCTAAGTTTCGAGCTGGACTCAGTGctcacgatgatattggcgtg
Setx_4	CCTCCTAAGTTTCGAGCTGGACTCAGTGcgtcggacgacagaacgatt
Setx_5	CCTCCTAAGTTTCGAGCTGGACTCAGTGttcagattgaactcggtggg
Setx_6	CCTCCTAAGTTTCGAGCTGGACTCAGTGcggaggtatgctttacgatt
Setx_7	CCTCCTAAGTTTCGAGCTGGACTCAGTGatggagaaccttcaggcaag
Setx_8	CCTCCTAAGTTTCGAGCTGGACTCAGTGaggtctgcgacatttctatg
Setx_9	CCTCCTAAGTTTCGAGCTGGACTCAGTGctttgtgttcattctctagc
Setx_10	CCTCCTAAGTTTCGAGCTGGACTCAGTGtcggtttttttgctccaata
Setx_11	CCTCCTAAGTTTCGAGCTGGACTCAGTGggagatttcgatttggagcg
Setx_12	CCTCCTAAGTTTCGAGCTGGACTCAGTGatctactgatgtcttggtcg
Setx_13	CCTCCTAAGTTTCGAGCTGGACTCAGTGttgagcaacttttggtttcc
Setx_14	CCTCCTAAGTTTCGAGCTGGACTCAGTGttcgggatgcaactatttgc
Setx_15	CCTCCTAAGTTTCGAGCTGGACTCAGTGgcggacagatattagttggt
Setx_16	CCTCCTAAGTTTCGAGCTGGACTCAGTGtacgaatcgcttacgggttg
Setx_17	CCTCCTAAGTTTCGAGCTGGACTCAGTGgttactatcagttcttcctt
Setx_18	CCTCCTAAGTTTCGAGCTGGACTCAGTGgatcttatttcatcacggct
Setx_19	CCTCCTAAGTTTCGAGCTGGACTCAGTGcgattttgatcggttgagca
Setx_20	CCTCCTAAGTTTCGAGCTGGACTCAGTGcgatttttgggcaaggatgg
Setx_21	CCTCCTAAGTTTCGAGCTGGACTCAGTGtctttaactttcacctcagc
Setx_22	CCTCCTAAGTTTCGAGCTGGACTCAGTGtgaacggtgggaacacttgt
Setx_23	CCTCCTAAGTTTCGAGCTGGACTCAGTGaaaaatccgccacgattggt
Setx_24	CCTCCTAAGTTTCGAGCTGGACTCAGTGgtttgggaactggtttcttt
Setx_25	CCTCCTAAGTTTCGAGCTGGACTCAGTGactttgttacaagtgcgctg
Setx_26	CCTCCTAAGTTTCGAGCTGGACTCAGTGtttgagtcttcggctttttg
Setx_27	CCTCCTAAGTTTCGAGCTGGACTCAGTGcttaaccctttcgatacagt
Setx_28	CCTCCTAAGTTTCGAGCTGGACTCAGTGgtatgtcgttcactggttta
Setx_29	CCTCCTAAGTTTCGAGCTGGACTCAGTGctttaggatactccgagagt
Setx_30	CCTCCTAAGTTTCGAGCTGGACTCAGTGtttcgatggtggaaagcagc
Setx_31	CCTCCTAAGTTTCGAGCTGGACTCAGTGgtttgctattgactctggta
Setx_32	CCTCCTAAGTTTCGAGCTGGACTCAGTGcttttagcatgccacaacag
Setx_33	CCTCCTAAGTTTCGAGCTGGACTCAGTGgctccaacagattggcaaag
Setx_34	CCTCCTAAGTTTCGAGCTGGACTCAGTGacgttgcctgagacaaactt
Setx_35	CCTCCTAAGTTTCGAGCTGGACTCAGTGcgtgcagtcaactgcttaat
Setx_36	CCTCCTAAGTTTCGAGCTGGACTCAGTGatgttctcctgatgttcatt
Setx_37	CCTCCTAAGTTTCGAGCTGGACTCAGTGacgttgataggtatgcagga
Setx_38	CCTCCTAAGTTTCGAGCTGGACTCAGTGataactcttgactttccggt
Setx_39	CCTCCTAAGTTTCGAGCTGGACTCAGTGtatcaagattttgcggtcca
Setx_40	CCTCCTAAGTTTCGAGCTGGACTCAGTGgtagtaggtggaattggtcg
Setx_41	CCTCCTAAGTTTCGAGCTGGACTCAGTGccaaatcgcattggcagtaa
Setx_42	CCTCCTAAGTTTCGAGCTGGACTCAGTGcaaagtctatggccttcttg
Setx_43	CCTCCTAAGTTTCGAGCTGGACTCAGTGgacagatctctggatgcatg
Setx_44	CCTCCTAAGTTTCGAGCTGGACTCAGTGgtttatcaactgatcctcgt
Setx_45	CCTCCTAAGTTTCGAGCTGGACTCAGTGaggcgaaacgagcagtacac
Setx_46	CCTCCTAAGTTTCGAGCTGGACTCAGTGctgggaataacctggcttag
Setx_47	CCTCCTAAGTTTCGAGCTGGACTCAGTGtcatcgcggtccaaattgaa
Setx_48	CCTCCTAAGTTTCGAGCTGGACTCAGTGatacactacgccatgcatag
ZnT49B
ZnT49B_1	CCTCCTAAGTTTCGAGCTGGACTCAGTGaaatttaaccatcaccggct
ZnT49B_2	CCTCCTAAGTTTCGAGCTGGACTCAGTGttgagggcgtacttgcaaat
ZnT49B_3	CCTCCTAAGTTTCGAGCTGGACTCAGTGgggtgcaaaacgaattgcgg
ZnT49B_4	CCTCCTAAGTTTCGAGCTGGACTCAGTGcgcaaaactacgtcatgcgg
ZnT49B_5	CCTCCTAAGTTTCGAGCTGGACTCAGTGagttcttttctattgtgggg
ZnT49B_6	CCTCCTAAGTTTCGAGCTGGACTCAGTGcgtcactatcgcactataga
ZnT49B_7	CCTCCTAAGTTTCGAGCTGGACTCAGTGctaaaagcctttcccaagtg
ZnT49B_8	CCTCCTAAGTTTCGAGCTGGACTCAGTGggtttttccttcttggaatc
ZnT49B_9	CCTCCTAAGTTTCGAGCTGGACTCAGTGttgtggtcttcacctcaaag
ZnT49B_10	CCTCCTAAGTTTCGAGCTGGACTCAGTGatggtggtgctgatagacag
ZnT49B_11	CCTCCTAAGTTTCGAGCTGGACTCAGTGctcgttaattttggagtcct
ZnT49B_12	CCTCCTAAGTTTCGAGCTGGACTCAGTGaacagaaccagagctctctc
ZnT49B_13	CCTCCTAAGTTTCGAGCTGGACTCAGTGcttttcactgtttcaggagg
ZnT49B_14	CCTCCTAAGTTTCGAGCTGGACTCAGTGagcaccagacggagaatttt
ZnT49B_15	CCTCCTAAGTTTCGAGCTGGACTCAGTGaggtggggatgttcgaatac
ZnT49B_16	CCTCCTAAGTTTCGAGCTGGACTCAGTGtttagaggaatcacaggcgc
ZnT49B_17	CCTCCTAAGTTTCGAGCTGGACTCAGTGgcacgataatcgaatcgggg
ZnT49B_18	CCTCCTAAGTTTCGAGCTGGACTCAGTGgtcacaaagttgcgctctag
ZnT49B_19	CCTCCTAAGTTTCGAGCTGGACTCAGTGacaagaaatcgctgatggcc
ZnT49B_20	CCTCCTAAGTTTCGAGCTGGACTCAGTGcagactttcgagttgagcag
ZnT49B_21	CCTCCTAAGTTTCGAGCTGGACTCAGTGgcaacagattttccttggac
ZnT49B_22	CCTCCTAAGTTTCGAGCTGGACTCAGTGaaccgccgtttaacagtgaa
ZnT49B_23	CCTCCTAAGTTTCGAGCTGGACTCAGTGctttctgttgtcgagcatta
ZnT49B_24	CCTCCTAAGTTTCGAGCTGGACTCAGTGaattggctgcattgatagcg
ZnT49B_25	CCTCCTAAGTTTCGAGCTGGACTCAGTGcttctgcaaacatgctgtga
ZnT49B_26	CCTCCTAAGTTTCGAGCTGGACTCAGTGgagctggttgattaagtcgg
ZnT49B_27	CCTCCTAAGTTTCGAGCTGGACTCAGTGagaggacttgtagatgccaa
ZnT49B_28	CCTCCTAAGTTTCGAGCTGGACTCAGTGcgcatgttcatgtatccata
ZnT49B_29	CCTCCTAAGTTTCGAGCTGGACTCAGTGcccgaaatcagcgaggaaac
ZnT49B_30	CCTCCTAAGTTTCGAGCTGGACTCAGTGccacagccaacgcaaaagat
ZnT49B_31	CCTCCTAAGTTTCGAGCTGGACTCAGTGgagaatgccatcaataccgt
ZnT49B_32	CCTCCTAAGTTTCGAGCTGGACTCAGTGatagatctgttatgggttcc
ZnT49B_33	CCTCCTAAGTTTCGAGCTGGACTCAGTGgctccctcagaaactaatga
ZnT49B_34	CCTCCTAAGTTTCGAGCTGGACTCAGTGcttaagctcattaatggcca
ZnT49B_35	CCTCCTAAGTTTCGAGCTGGACTCAGTGacatattgttttccttagcc
ZnT49B_36	CCTCCTAAGTTTCGAGCTGGACTCAGTGatccttgccagaaatcacat
ZnT49B_37	CCTCCTAAGTTTCGAGCTGGACTCAGTGctataaccagtgaaccagcg
ZnT49B_38	CCTCCTAAGTTTCGAGCTGGACTCAGTGcgctcggaagcaatggatat
ZnT49B_39	CCTCCTAAGTTTCGAGCTGGACTCAGTGcattacatcagcctccaaag
ZnT49B_40	CCTCCTAAGTTTCGAGCTGGACTCAGTGccttgacatcgtaaatcgct
ZnT49B_41	CCTCCTAAGTTTCGAGCTGGACTCAGTGcgagcattgccaatatcgat
ZnT49B_42	CCTCCTAAGTTTCGAGCTGGACTCAGTGgtttgtccagatacgaacgg
ZnT49B_43	CCTCCTAAGTTTCGAGCTGGACTCAGTGtcaaccttttgaaagcctcg
ZnT49B_44	CCTCCTAAGTTTCGAGCTGGACTCAGTGcacaatgttttcgccttgat
ZnT49B_45	CCTCCTAAGTTTCGAGCTGGACTCAGTGgcaagttcatctcaatgcga
ZnT49B_46	CCTCCTAAGTTTCGAGCTGGACTCAGTGgcgattagagtatttccagg
ZnT49B_47	CCTCCTAAGTTTCGAGCTGGACTCAGTGaaccaaatcacccaatgctt
ZnT49B_48	CCTCCTAAGTTTCGAGCTGGACTCAGTGtatattcaaaccacgggctc
CG8202
CG8202_1	CCTCCTAAGTTTCGAGCTGGACTCAGTGcgaattcgctgaccatttga
CG8202_2	CCTCCTAAGTTTCGAGCTGGACTCAGTGctcattggttgtaaagcggt
CG8202_3	CCTCCTAAGTTTCGAGCTGGACTCAGTGgacaccagaaagctggtaga
CG8202_4	CCTCCTAAGTTTCGAGCTGGACTCAGTGtgctttaatgctttcgttgc
CG8202_5	CCTCCTAAGTTTCGAGCTGGACTCAGTGctccaagcgaaactttgtct
CG8202_6	CCTCCTAAGTTTCGAGCTGGACTCAGTGtgctcaaaccgctgaatgta
CG8202_7	CCTCCTAAGTTTCGAGCTGGACTCAGTGcttttactcgctgatcgttg
CG8202_8	CCTCCTAAGTTTCGAGCTGGACTCAGTGcacactgtatggctatcttc
CG8202_9	CCTCCTAAGTTTCGAGCTGGACTCAGTGtagaattgcagcacagtggt
CG8202_10	CCTCCTAAGTTTCGAGCTGGACTCAGTGaaccaattctggcacgtatc
CG8202_11	CCTCCTAAGTTTCGAGCTGGACTCAGTGcggcagtaactcacgaatcg
CG8202_12	CCTCCTAAGTTTCGAGCTGGACTCAGTGacaggaactcgtagcacttg
CG8202_13	CCTCCTAAGTTTCGAGCTGGACTCAGTGacgttgcaaaatgcgctcat
CG8202_14	CCTCCTAAGTTTCGAGCTGGACTCAGTGgcatagctcgataccaaagg
CG8202_15	CCTCCTAAGTTTCGAGCTGGACTCAGTGaacaggtcggcaaagttctc
CG8202_16	CCTCCTAAGTTTCGAGCTGGACTCAGTGcggatgcagattaaagcggg
CG8202_17	CCTCCTAAGTTTCGAGCTGGACTCAGTGtcaaaggctggggcatatag
CG8202_18	CCTCCTAAGTTTCGAGCTGGACTCAGTGtcaactgcttgcactcatta
CG8202_19	CCTCCTAAGTTTCGAGCTGGACTCAGTGggcgtttcggaagcattaat
CG8202_20	CCTCCTAAGTTTCGAGCTGGACTCAGTGcttgttgatcgtctcgaagg
CG8202_21	CCTCCTAAGTTTCGAGCTGGACTCAGTGtgtgatacaaagacagccca
CG8202_22	CCTCCTAAGTTTCGAGCTGGACTCAGTGattcagttctcctagcaatc
CG8202_23	CCTCCTAAGTTTCGAGCTGGACTCAGTGttttcataggctttgccaag
CG8202_24	CCTCCTAAGTTTCGAGCTGGACTCAGTGtccgggtaagaatgttttgc
CG8202_25	CCTCCTAAGTTTCGAGCTGGACTCAGTGcaatgctgcgatagttttgc
CG8202_26	CCTCCTAAGTTTCGAGCTGGACTCAGTGcaccgactccttttgaaaga
CG8202_27	CCTCCTAAGTTTCGAGCTGGACTCAGTGcacagcgtcgcaagtatatt
CG8202_28	CCTCCTAAGTTTCGAGCTGGACTCAGTGcaagatcttcccgagataca
CG8202_29	CCTCCTAAGTTTCGAGCTGGACTCAGTGgacagggcattcactgaatc
CG8202_30	CCTCCTAAGTTTCGAGCTGGACTCAGTGgatgagctgagctatctgac
CG8202_31	CCTCCTAAGTTTCGAGCTGGACTCAGTGgcaccagagtaacgtatact
CG8202_32	CCTCCTAAGTTTCGAGCTGGACTCAGTGtgatttcgaacggtttcggg
CG8202_33	CCTCCTAAGTTTCGAGCTGGACTCAGTGcagcttcaatgctgggaatg
CG8202_34	CCTCCTAAGTTTCGAGCTGGACTCAGTGcagacagagatgctgcagag
CG8202_35	CCTCCTAAGTTTCGAGCTGGACTCAGTGaaggaatggctctaagctgc
CG8202_36	CCTCCTAAGTTTCGAGCTGGACTCAGTGcgattaatgtggccaggata
CG8202_37	CCTCCTAAGTTTCGAGCTGGACTCAGTGcacttctagcagaaggcgaa
CG8202_38	CCTCCTAAGTTTCGAGCTGGACTCAGTGagatagatgatactcggcgc
CG8202_39	CCTCCTAAGTTTCGAGCTGGACTCAGTGgcacatacagcatatcgagg
CG8202_40	CCTCCTAAGTTTCGAGCTGGACTCAGTGcacatattgtttacctcctg
CG8202_41	CCTCCTAAGTTTCGAGCTGGACTCAGTGagctgcagaagaatggcatc
CG8202_42	CCTCCTAAGTTTCGAGCTGGACTCAGTGaaaaagttccagggctagct
CG8202_43	CCTCCTAAGTTTCGAGCTGGACTCAGTGtcagcgtactttacaatcct
CG8202_44	CCTCCTAAGTTTCGAGCTGGACTCAGTGgactgccaattgagcgatag
CG8202_45	CCTCCTAAGTTTCGAGCTGGACTCAGTGttgtgattgtgccttgttag
CG8202_46	CCTCCTAAGTTTCGAGCTGGACTCAGTGatatgatctctacactgcgc
CG8202_47	CCTCCTAAGTTTCGAGCTGGACTCAGTGggtgatgcatcctttatttg
CG8202_48	CCTCCTAAGTTTCGAGCTGGACTCAGTGgtttatcacctacgtaggta
CG7943
CG7943_1	CCTCCTAAGTTTCGAGCTGGACTCAGTGaccaatcgctgggtactaaa
CG7943_2	CCTCCTAAGTTTCGAGCTGGACTCAGTGcgtacttgatgtcttcgttc
CG7943_3	CCTCCTAAGTTTCGAGCTGGACTCAGTGcctaacaggggtaaacctta
CG7943_4	CCTCCTAAGTTTCGAGCTGGACTCAGTGcctaatgacgacgatggtct
CG7943_5	CCTCCTAAGTTTCGAGCTGGACTCAGTGcactgacttggctaattggt
CG7943_6	CCTCCTAAGTTTCGAGCTGGACTCAGTGtagcgtgggaacacctttaa
CG7943_7	CCTCCTAAGTTTCGAGCTGGACTCAGTGtcaggagacgaaggtttcga
CG7943_8	CCTCCTAAGTTTCGAGCTGGACTCAGTGttcaaaagatccgtctcctg
CG7943_9	CCTCCTAAGTTTCGAGCTGGACTCAGTGtgattattttctgctgcagc
CG7943_10	CCTCCTAAGTTTCGAGCTGGACTCAGTGaagttcataagcggtggagc
CG7943_11	CCTCCTAAGTTTCGAGCTGGACTCAGTGttgggagtggaactggtatc
CG7943_12	CCTCCTAAGTTTCGAGCTGGACTCAGTGggcgaacatgtcgaatagca
CG7943_13	CCTCCTAAGTTTCGAGCTGGACTCAGTGctttcttcaagttgtccatc
CG7943_14	CCTCCTAAGTTTCGAGCTGGACTCAGTGcgtctcgtagttatttagct
CG7943_15	CCTCCTAAGTTTCGAGCTGGACTCAGTGgattgagatgctgagtttcc
CG7943_16	CCTCCTAAGTTTCGAGCTGGACTCAGTGagcacaatattgggggcaac
CG7943_17	CCTCCTAAGTTTCGAGCTGGACTCAGTGcgggaataacgaactgctgc
CG7943_18	CCTCCTAAGTTTCGAGCTGGACTCAGTGatgtccttgacgaaactcgt
CG7943_19	CCTCCTAAGTTTCGAGCTGGACTCAGTGggtcttgcagcgattgtaaa
CG7943_20	CCTCCTAAGTTTCGAGCTGGACTCAGTGgaatgtagtcggccaacttg
CG7943_21	CCTCCTAAGTTTCGAGCTGGACTCAGTGccaggaatcgggattatagc
CG7943_22	CCTCCTAAGTTTCGAGCTGGACTCAGTGcttactgcaactctggagtg
CG7943_23	CCTCCTAAGTTTCGAGCTGGACTCAGTGacataagagtgcacgacctt
CG7943_24	CCTCCTAAGTTTCGAGCTGGACTCAGTGgattgtgtggctttttgttc
CG7943_25	CCTCCTAAGTTTCGAGCTGGACTCAGTGttgacaagggcgttcatcag
CG7943_26	CCTCCTAAGTTTCGAGCTGGACTCAGTGtagtcgaagatctcagcgga
CG7943_27	CCTCCTAAGTTTCGAGCTGGACTCAGTGccgtttgaaccaagacatgg
CG7943_28	CCTCCTAAGTTTCGAGCTGGACTCAGTGcggacaggaatacggcatta
CG7943_29	CCTCCTAAGTTTCGAGCTGGACTCAGTGtggagcagcactggaagtaa
CG7943_30	CCTCCTAAGTTTCGAGCTGGACTCAGTGtaccgcatgagtgcataatc
CG7943_31	CCTCCTAAGTTTCGAGCTGGACTCAGTGaactgtccggaatagtcgta
CG7943_32	CCTCCTAAGTTTCGAGCTGGACTCAGTGaaagatgcccattacgttgg
CG7943_33	CCTCCTAAGTTTCGAGCTGGACTCAGTGctcactgtattgcctaagtg
CG7943_34	CCTCCTAAGTTTCGAGCTGGACTCAGTGgctcctcacaaaactgtagt
CG7943_35	CCTCCTAAGTTTCGAGCTGGACTCAGTGggttgtcgtagcgatggaaa
CG7943_36	CCTCCTAAGTTTCGAGCTGGACTCAGTGttcttgttggacagatgctt
CG7943_37	CCTCCTAAGTTTCGAGCTGGACTCAGTGgctggcagctgaaaagagta
CG7943_38	CCTCCTAAGTTTCGAGCTGGACTCAGTGcattccggagagacgatgac
CG7943_39	CCTCCTAAGTTTCGAGCTGGACTCAGTGaacttgacgcactccaagtg
CG7943_40	CCTCCTAAGTTTCGAGCTGGACTCAGTGtgtgtggtacatgacactgt
CG7943_41	CCTCCTAAGTTTCGAGCTGGACTCAGTGtagtcagagagattcggctg
CG7943_42	CCTCCTAAGTTTCGAGCTGGACTCAGTGgatggtattttgggtactct
CG7943_43	CCTCCTAAGTTTCGAGCTGGACTCAGTGgactaaccaagcagcgtgaa
CG7943_44	CCTCCTAAGTTTCGAGCTGGACTCAGTGcacgtgggatgactactaca
CG7943_45	CCTCCTAAGTTTCGAGCTGGACTCAGTGacaagtacaaatgccgctcg
CG7943_46	CCTCCTAAGTTTCGAGCTGGACTCAGTGttttgtggctaactaagcgc
CG7943_47	CCTCCTAAGTTTCGAGCTGGACTCAGTGatattgtgtgcgttttcagc
CG7943_48	CCTCCTAAGTTTCGAGCTGGACTCAGTGtcttccaacctcaaaagacc
IntS11
IntS11_1	CCTCCTAAGTTTCGAGCTGGACTCAGTGctttttggctagctgatgac
IntS11_2	CCTCCTAAGTTTCGAGCTGGACTCAGTGgaattgagcacctttctgtt
IntS11_3	CCTCCTAAGTTTCGAGCTGGACTCAGTGgagaagcgggaacaccgaaa
IntS11_4	CCTCCTAAGTTTCGAGCTGGACTCAGTGgcctcagaatattgttgttg
IntS11_5	CCTCCTAAGTTTCGAGCTGGACTCAGTGtgctaaaacccgacgcgaaa
IntS11_6	CCTCCTAAGTTTCGAGCTGGACTCAGTGagaggcggcgtaaaacactt
IntS11_7	CCTCCTAAGTTTCGAGCTGGACTCAGTGcgttttttccacagtcacaa
IntS11_8	CCTCCTAAGTTTCGAGCTGGACTCAGTGcggctatctttggatttgta
IntS11_9	CCTCCTAAGTTTCGAGCTGGACTCAGTGtcgtatctttacgcgtatca
IntS11_10	CCTCCTAAGTTTCGAGCTGGACTCAGTGtttgattttcgctgcagttt
IntS11_11	CCTCCTAAGTTTCGAGCTGGACTCAGTGaaccatgttgcacttgtgat
IntS11_12	CCTCCTAAGTTTCGAGCTGGACTCAGTGgctttagtttactctttgct
IntS11_13	CCTCCTAAGTTTCGAGCTGGACTCAGTGcctctaagatgcagttactc
IntS11_14	CCTCCTAAGTTTCGAGCTGGACTCAGTGtgactcaaagttggttctcc
IntS11_15	CCTCCTAAGTTTCGAGCTGGACTCAGTGgttttcggtgcgataaagct
IntS11_16	CCTCCTAAGTTTCGAGCTGGACTCAGTGcatcttgcggggattacttc
IntS11_17	CCTCCTAAGTTTCGAGCTGGACTCAGTGctttcatatccgattccatg
IntS11_18	CCTCCTAAGTTTCGAGCTGGACTCAGTGaggttcataaggggagctag
IntS11_19	CCTCCTAAGTTTCGAGCTGGACTCAGTGgtgatgatggtggttgtgat
IntS11_20	CCTCCTAAGTTTCGAGCTGGACTCAGTGtgggactcaattcgctggag
IntS11_21	CCTCCTAAGTTTCGAGCTGGACTCAGTGcgatgtcatgtgatggcttc
IntS11_22	CCTCCTAAGTTTCGAGCTGGACTCAGTGccaaaccatgaacgcattca
IntS11_23	CCTCCTAAGTTTCGAGCTGGACTCAGTGttcgagatctccgagttgtg
IntS11_24	CCTCCTAAGTTTCGAGCTGGACTCAGTGtggtcagcgttttagtcttg
IntS11_25	CCTCCTAAGTTTCGAGCTGGACTCAGTGgcgttcatctggtacatatc
IntS11_26	CCTCCTAAGTTTCGAGCTGGACTCAGTGcattgggcatgtatccattg
IntS11_27	CCTCCTAAGTTTCGAGCTGGACTCAGTGccatgtaggaggtctgatag
IntS11_28	CCTCCTAAGTTTCGAGCTGGACTCAGTGcatacccgttgttgtacatg
IntS11_29	CCTCCTAAGTTTCGAGCTGGACTCAGTGatgtggatatatccaggagg
IntS11_30	CCTCCTAAGTTTCGAGCTGGACTCAGTGatcctagggctttagttaat
IntS11_31	CCTCCTAAGTTTCGAGCTGGACTCAGTGcctgcttaagaactaaggct
IntS11_32	CCTCCTAAGTTTCGAGCTGGACTCAGTGactctgccacttcgaaattc
IntS11_33	CCTCCTAAGTTTCGAGCTGGACTCAGTGtgtggtacaacagtgcgtat
IntS11_34	CCTCCTAAGTTTCGAGCTGGACTCAGTGgcaagtgagttgtcatctta
IntS11_35	CCTCCTAAGTTTCGAGCTGGACTCAGTGtcgaagcagaacggtatgga
IntS11_36	CCTCCTAAGTTTCGAGCTGGACTCAGTGttagctatgcaacaagcggg
IntS11_37	CCTCCTAAGTTTCGAGCTGGACTCAGTGccgtaattggcaacagttta
IntS11_38	CCTCCTAAGTTTCGAGCTGGACTCAGTGacgaatttgttgttgttgcc
IntS11_39	CCTCCTAAGTTTCGAGCTGGACTCAGTGttgctcccttcaattgaacg
IntS11_40	CCTCCTAAGTTTCGAGCTGGACTCAGTGctgcctttactcctactaaa
IntS11_41	CCTCCTAAGTTTCGAGCTGGACTCAGTGaaatattttcatcgcctcgc
IntS11_42	CCTCCTAAGTTTCGAGCTGGACTCAGTGttgtcttgtctggtatttgt
IntS11_43	CCTCCTAAGTTTCGAGCTGGACTCAGTGattatgcagtagatgcttgc
IntS11_44	CCTCCTAAGTTTCGAGCTGGACTCAGTGacattttctctggttgtgtt
IntS11_45	CCTCCTAAGTTTCGAGCTGGACTCAGTGctgcttcttggtttgttttt
IntS11_46	CCTCCTAAGTTTCGAGCTGGACTCAGTGccatgtttcacaatcacgtt
IntS11_47	CCTCCTAAGTTTCGAGCTGGACTCAGTGggatttgtttgttttcgctg
IntS11_48	CCTCCTAAGTTTCGAGCTGGACTCAGTGtattatttccaggtgcttgg
Vps29
Vps29_1	CCTCCTAAGTTTCGAGCTGGACTCAGTGggtggctgcgataacgataa
Vps29_2	CCTCCTAAGTTTCGAGCTGGACTCAGTGaaattgtgaaacgcccagcg
Vps29_3	CCTCCTAAGTTTCGAGCTGGACTCAGTGtgaagctttgttgtgtttcc
Vps29_4	CCTCCTAAGTTTCGAGCTGGACTCAGTGcgagtaccagaacgagcatc
Vps29_5	CCTCCTAAGTTTCGAGCTGGACTCAGTGcttcttaaatttagccggca
Vps29_6	CCTCCTAAGTTTCGAGCTGGACTCAGTGtggccaggatgtgatgtatg
Vps29_7	CCTCCTAAGTTTCGAGCTGGACTCAGTGactccttggtgcagatgttt
Vps29_8	CCTCCTAAGTTTCGAGCTGGACTCAGTGagggacttcaggtagtcgta
Vps29_9	CCTCCTAAGTTTCGAGCTGGACTCAGTGgcactatgtgcacatcattg
Vps29_10	CCTCCTAAGTTTCGAGCTGGACTCAGTGtacgtcaggttctcgtcgaa
Vps29_11	CCTCCTAAGTTTCGAGCTGGACTCAGTGcacagaccgatccggaactg
Vps29_12	CCTCCTAAGTTTCGAGCTGGACTCAGTGgtgatcaggatgtccacgtc
Vps29_13	CCTCCTAAGTTTCGAGCTGGACTCAGTGgtaggcctcgaacttgtacg
Vps29_14	CCTCCTAAGTTTCGAGCTGGACTCAGTGgatcccggattgatgtagaa
Vps29_15	CCTCCTAAGTTTCGAGCTGGACTCAGTGcgaacgaaggcaccacattg
Vps29_16	CCTCCTAAGTTTCGAGCTGGACTCAGTGgtgctctgaatgtccatcag
Vps29_17	CCTCCTAAGTTTCGAGCTGGACTCAGTGagttggtacacgtacgtgac
Vps29_18	CCTCCTAAGTTTCGAGCTGGACTCAGTGttcttgtactcgatgcgctc
Vps29_19	CCTCCTAAGTTTCGAGCTGGACTCAGTGgctaatactaggaccctaga
Vps29_20	CCTCCTAAGTTTCGAGCTGGACTCAGTGgattggaggggaatggctgg
Vps29_21	CCTCCTAAGTTTCGAGCTGGACTCAGTGagaatgcaggggtcaagggt
Vps29_22	CCTCCTAAGTTTCGAGCTGGACTCAGTGtttctttaatgaagccgagc
Vps29_23	CCTCCTAAGTTTCGAGCTGGACTCAGTGcttgatttattgctacgtac
Vps29_24	CCTCCTAAGTTTCGAGCTGGACTCAGTGggtgctagcattttttatca
Vps29_25	CCTCCTAAGTTTCGAGCTGGACTCAGTGccgttcgtacttttattctc
Vps29_26	CCTCCTAAGTTTCGAGCTGGACTCAGTGccttactttgtaatcgttta
Vps29_27	CCTCCTAAGTTTCGAGCTGGACTCAGTGcacaatttctgggggtgttt
Vps29_28	CCTCCTAAGTTTCGAGCTGGACTCAGTGtatcagattattgtgggagt
Vps29_29	CCTCCTAAGTTTCGAGCTGGACTCAGTGctcgatcatcagatgtaact
Vps29_30	CCTCCTAAGTTTCGAGCTGGACTCAGTGcgaacttttgagcagactct
CG8778
CG8778_1	CCTCCTAAGTTTCGAGCTGGACTCAGTGaacgaccggcagaaaacagc
CG8778_2	CCTCCTAAGTTTCGAGCTGGACTCAGTGaccagacgctctttttatta
CG8778_3	CCTCCTAAGTTTCGAGCTGGACTCAGTGaacaagtggccgggctaact
CG8778_4	CCTCCTAAGTTTCGAGCTGGACTCAGTGccgacgccaaattacgtgat
CG8778_5	CCTCCTAAGTTTCGAGCTGGACTCAGTGcacgagaacttcagttccat
CG8778_6	CCTCCTAAGTTTCGAGCTGGACTCAGTGaataactgagataccctgcc
CG8778_7	CCTCCTAAGTTTCGAGCTGGACTCAGTGtttgctgctggtcggtttag
CG8778_8	CCTCCTAAGTTTCGAGCTGGACTCAGTGcattccccggctaaaggaat
CG8778_9	CCTCCTAAGTTTCGAGCTGGACTCAGTGaggacatcgttgaaggtctc
CG8778_10	CCTCCTAAGTTTCGAGCTGGACTCAGTGcgatccattatccttcttta
CG8778_11	CCTCCTAAGTTTCGAGCTGGACTCAGTGcagactcctcaatacaacca
CG8778_12	CCTCCTAAGTTTCGAGCTGGACTCAGTGcggcacagaagattccaggg
CG8778_13	CCTCCTAAGTTTCGAGCTGGACTCAGTGccttttcgctctttcaaatc
CG8778_14	CCTCCTAAGTTTCGAGCTGGACTCAGTGccctgagctcttttacaaat
CG8778_15	CCTCCTAAGTTTCGAGCTGGACTCAGTGctgctcaatggcaataagca
CG8778_16	CCTCCTAAGTTTCGAGCTGGACTCAGTGcatcttcgtgtcgctagcag
CG8778_17	CCTCCTAAGTTTCGAGCTGGACTCAGTGtatgatggctaaccttgtct
CG8778_18	CCTCCTAAGTTTCGAGCTGGACTCAGTGcagagcaggggacagaatgc
CG8778_19	CCTCCTAAGTTTCGAGCTGGACTCAGTGgccgtgaaaatgagttcttt
CG8778_20	CCTCCTAAGTTTCGAGCTGGACTCAGTGctctgctccgttaaacactc
CG8778_21	CCTCCTAAGTTTCGAGCTGGACTCAGTGttaaccagacccagatcttt
CG8778_22	CCTCCTAAGTTTCGAGCTGGACTCAGTGgtttcgttctgtttcactac
CG8778_23	CCTCCTAAGTTTCGAGCTGGACTCAGTGtttaagtgcctgctgatagg
CG8778_24	CCTCCTAAGTTTCGAGCTGGACTCAGTGattcgggagaatttcctctg
CG8778_25	CCTCCTAAGTTTCGAGCTGGACTCAGTGcttgtcaatggccagtttgg
CG8778_26	CCTCCTAAGTTTCGAGCTGGACTCAGTGgagtagcagatctcttcgat
CG8778_27	CCTCCTAAGTTTCGAGCTGGACTCAGTGaacgatccttagtgggtatc
CG8778_28	CCTCCTAAGTTTCGAGCTGGACTCAGTGttctcggcaaaggcagcgag
CG8778_29	CCTCCTAAGTTTCGAGCTGGACTCAGTGcacgatatctatttactccc
CG8778_30	CCTCCTAAGTTTCGAGCTGGACTCAGTGtcagcttaacgttaggggag
CG8778_31	CCTCCTAAGTTTCGAGCTGGACTCAGTGccgcttaagtgtttctacaa
CG8778_32	CCTCCTAAGTTTCGAGCTGGACTCAGTGagctcgataggatcgaatgc
CG15093
CG15093_1	CCTCCTAAGTTTCGAGCTGGACTCAGTGctgtcagaagcacactgctc
CG15093_2	CCTCCTAAGTTTCGAGCTGGACTCAGTGaaagttctacgtgatcggac
CG15093_3	CCTCCTAAGTTTCGAGCTGGACTCAGTGaggggatacggctgaaactg
CG15093_4	CCTCCTAAGTTTCGAGCTGGACTCAGTGccacctgttggtgtaagaaa
CG15093_5	CCTCCTAAGTTTCGAGCTGGACTCAGTGaaataggcaactagccacca
CG15093_6	CCTCCTAAGTTTCGAGCTGGACTCAGTGgcgaaaagttctacagtgtt
CG15093_7	CCTCCTAAGTTTCGAGCTGGACTCAGTGacatcacacggagcgacatg
CG15093_8	CCTCCTAAGTTTCGAGCTGGACTCAGTGcacgaagccgatgttcttgg
CG15093_9	CCTCCTAAGTTTCGAGCTGGACTCAGTGtgattagattgctggccatg
CG15093_10	CCTCCTAAGTTTCGAGCTGGACTCAGTGgggcttggagatatcgaaga
CG15093_11	CCTCCTAAGTTTCGAGCTGGACTCAGTGcacaaagtccgagttcttgg
CG15093_12	CCTCCTAAGTTTCGAGCTGGACTCAGTGatccacaatggcattgttcg
CG15093_13	CCTCCTAAGTTTCGAGCTGGACTCAGTGcagtcatctcatcgtaggag
CG15093_14	CCTCCTAAGTTTCGAGCTGGACTCAGTGaagatggtgtccttgttgac
CG15093_15	CCTCCTAAGTTTCGAGCTGGACTCAGTGcgagatcgtcgacgagtcaa
CG15093_16	CCTCCTAAGTTTCGAGCTGGACTCAGTGcttcttctgcaacgacttga
CG15093_17	CCTCCTAAGTTTCGAGCTGGACTCAGTGggaaacgggggcatcgataa
CG15093_18	CCTCCTAAGTTTCGAGCTGGACTCAGTGcaccatgaaggtgagggtgg
CG15093_19	CCTCCTAAGTTTCGAGCTGGACTCAGTGcttgacggcattgtactccg
CG15093_20	CCTCCTAAGTTTCGAGCTGGACTCAGTGcgcagtgggtgatcttcttg
CG15093_21	CCTCCTAAGTTTCGAGCTGGACTCAGTGagcatcatgttgttgcacag
CG15093_22	CCTCCTAAGTTTCGAGCTGGACTCAGTGccgaaacaccgatcatcgag
CG15093_23	CCTCCTAAGTTTCGAGCTGGACTCAGTGaagacattggcatcgagacc
CG15093_24	CCTCCTAAGTTTCGAGCTGGACTCAGTGgtggaggagttgatgatctc
CG15093_25	CCTCCTAAGTTTCGAGCTGGACTCAGTGcagggttgtagatctccgag
CG15093_26	CCTCCTAAGTTTCGAGCTGGACTCAGTGgatcagagccgaggagaaac
CG15093_27	CCTCCTAAGTTTCGAGCTGGACTCAGTGcgggatgggtgagttggaag
CG15093_28	CCTCCTAAGTTTCGAGCTGGACTCAGTGtatcgcacagcgactggtag
CG15093_29	CCTCCTAAGTTTCGAGCTGGACTCAGTGcacggagaagtccttgttgc
CG15093_30	CCTCCTAAGTTTCGAGCTGGACTCAGTGccttcttcatcaggtcgtac
CG15093_31	CCTCCTAAGTTTCGAGCTGGACTCAGTGgtaacctaaacgctgaactt
CG15093_32	CCTCCTAAGTTTCGAGCTGGACTCAGTGcaccacaacctgtagtctgt
CG15093_33	CCTCCTAAGTTTCGAGCTGGACTCAGTGgtggacatgacgtggttgtg
CG15093_34	CCTCCTAAGTTTCGAGCTGGACTCAGTGtaaatgcaggactggtttgg
