# Supplementary figures and images for: An expanded toolkit for Drosophila gene tagging using synthesized homology donor constructs for CRISPR-mediated homologous recombination
Source: eLife journal article supplement (doi:10.7554/elife.76077), 2022-06-20

**A**

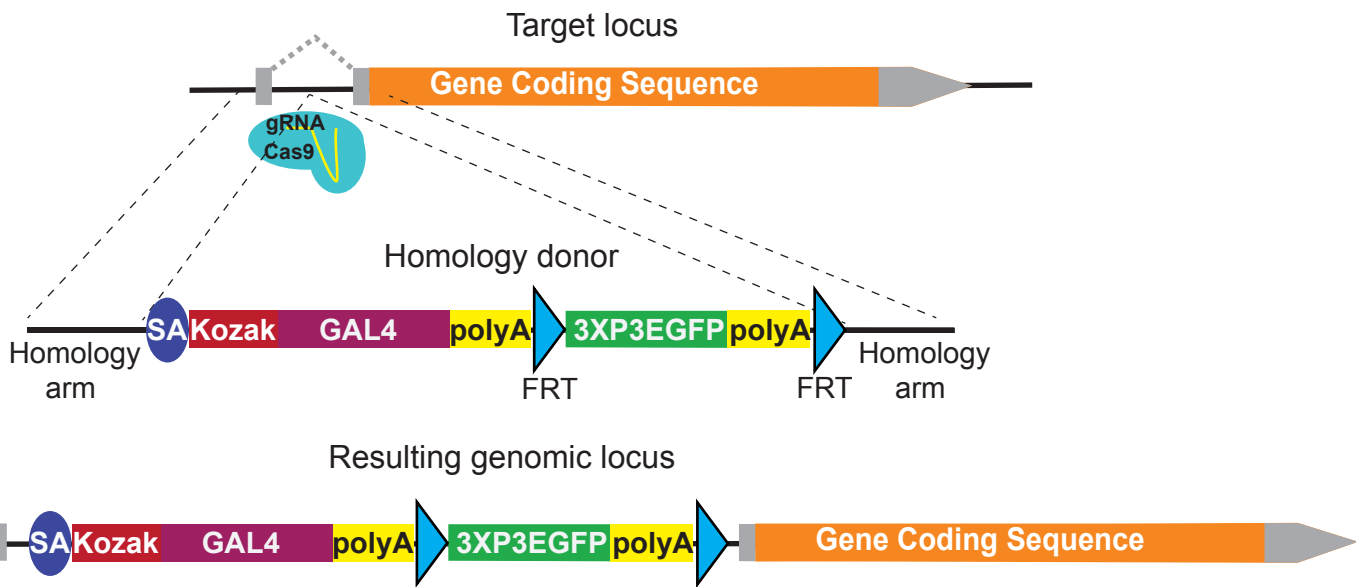

**B**

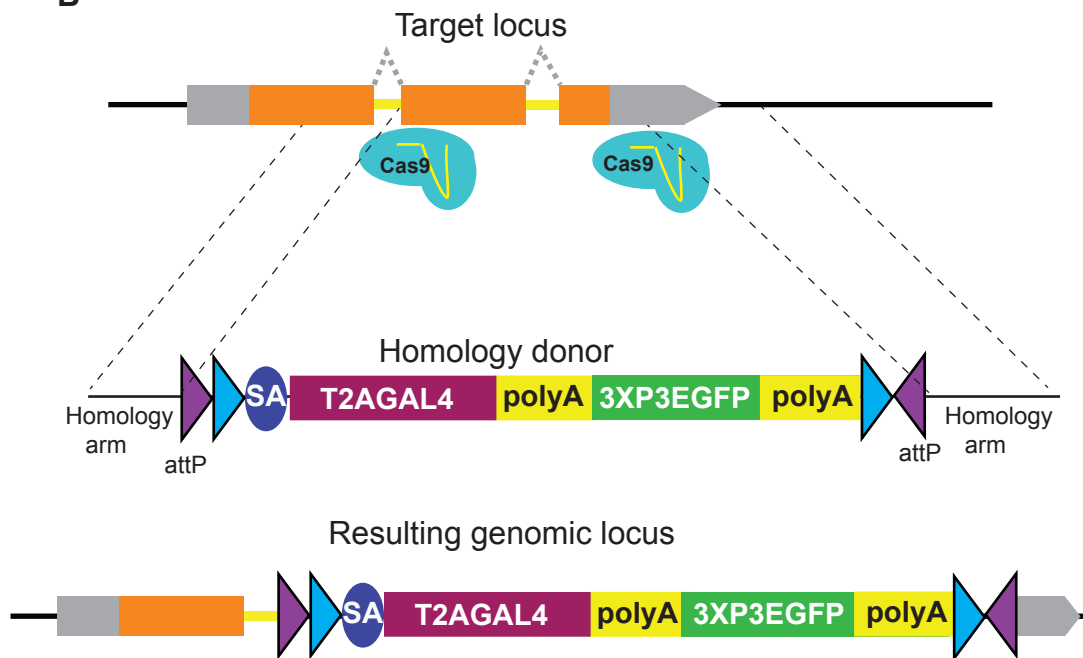

Supplement: supp [file elife_poa_e76077_Figure_1_figure_supplement_1.pdf › elife_poa_e76077_Figure_1_figure_supplement_1.pdf]

A

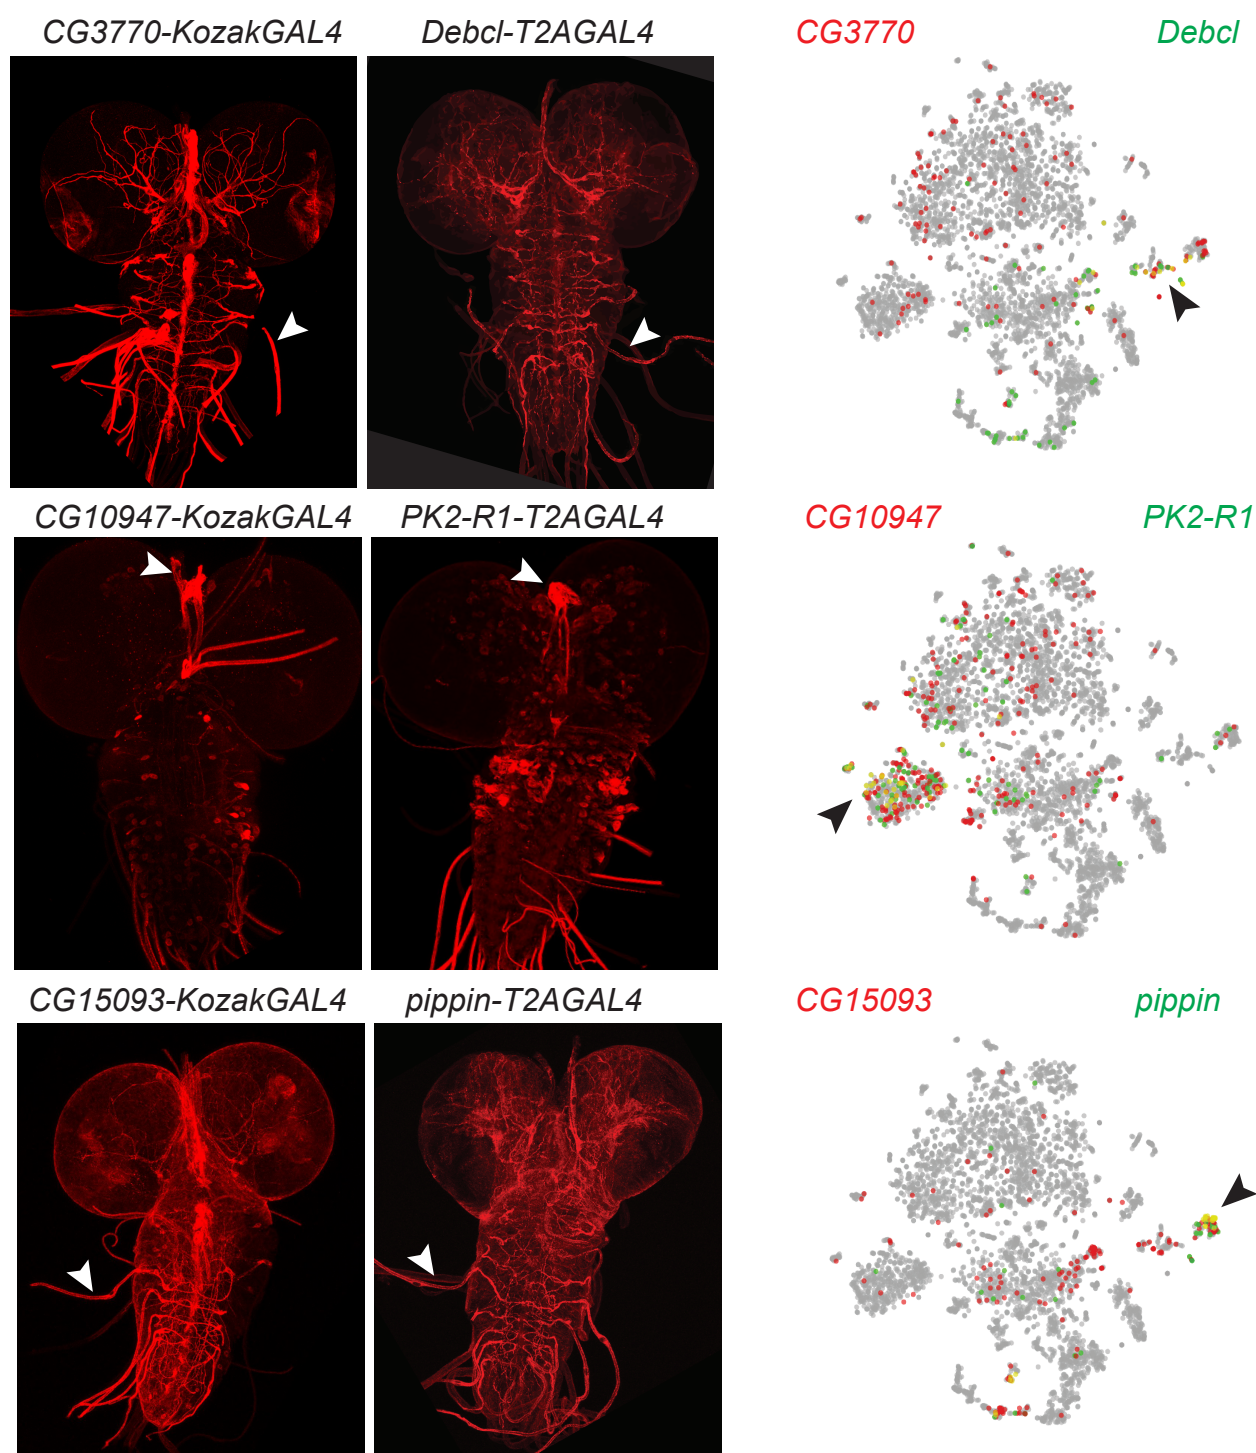

B

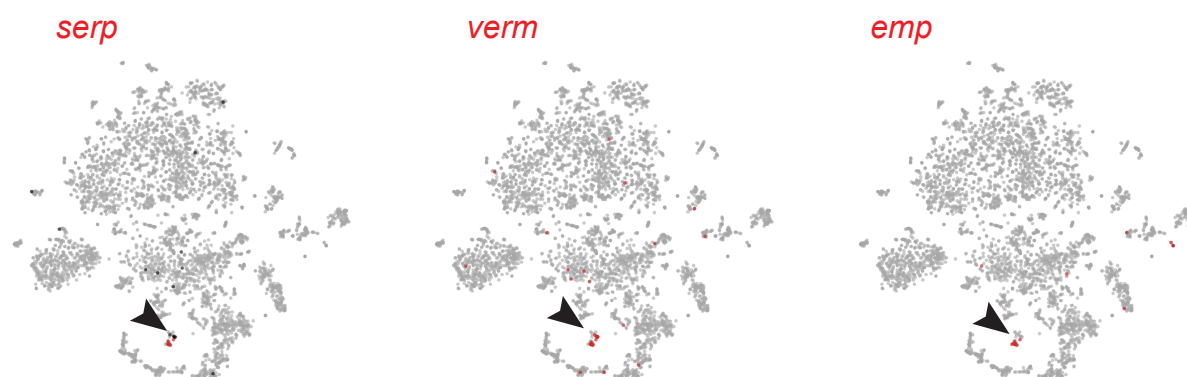

Supplement: supp [file elife_poa_e76077_Figure_2_figure_supplement_1.pdf › elife_poa_e76077_Figure_2_figure_supplement_1.pdf]

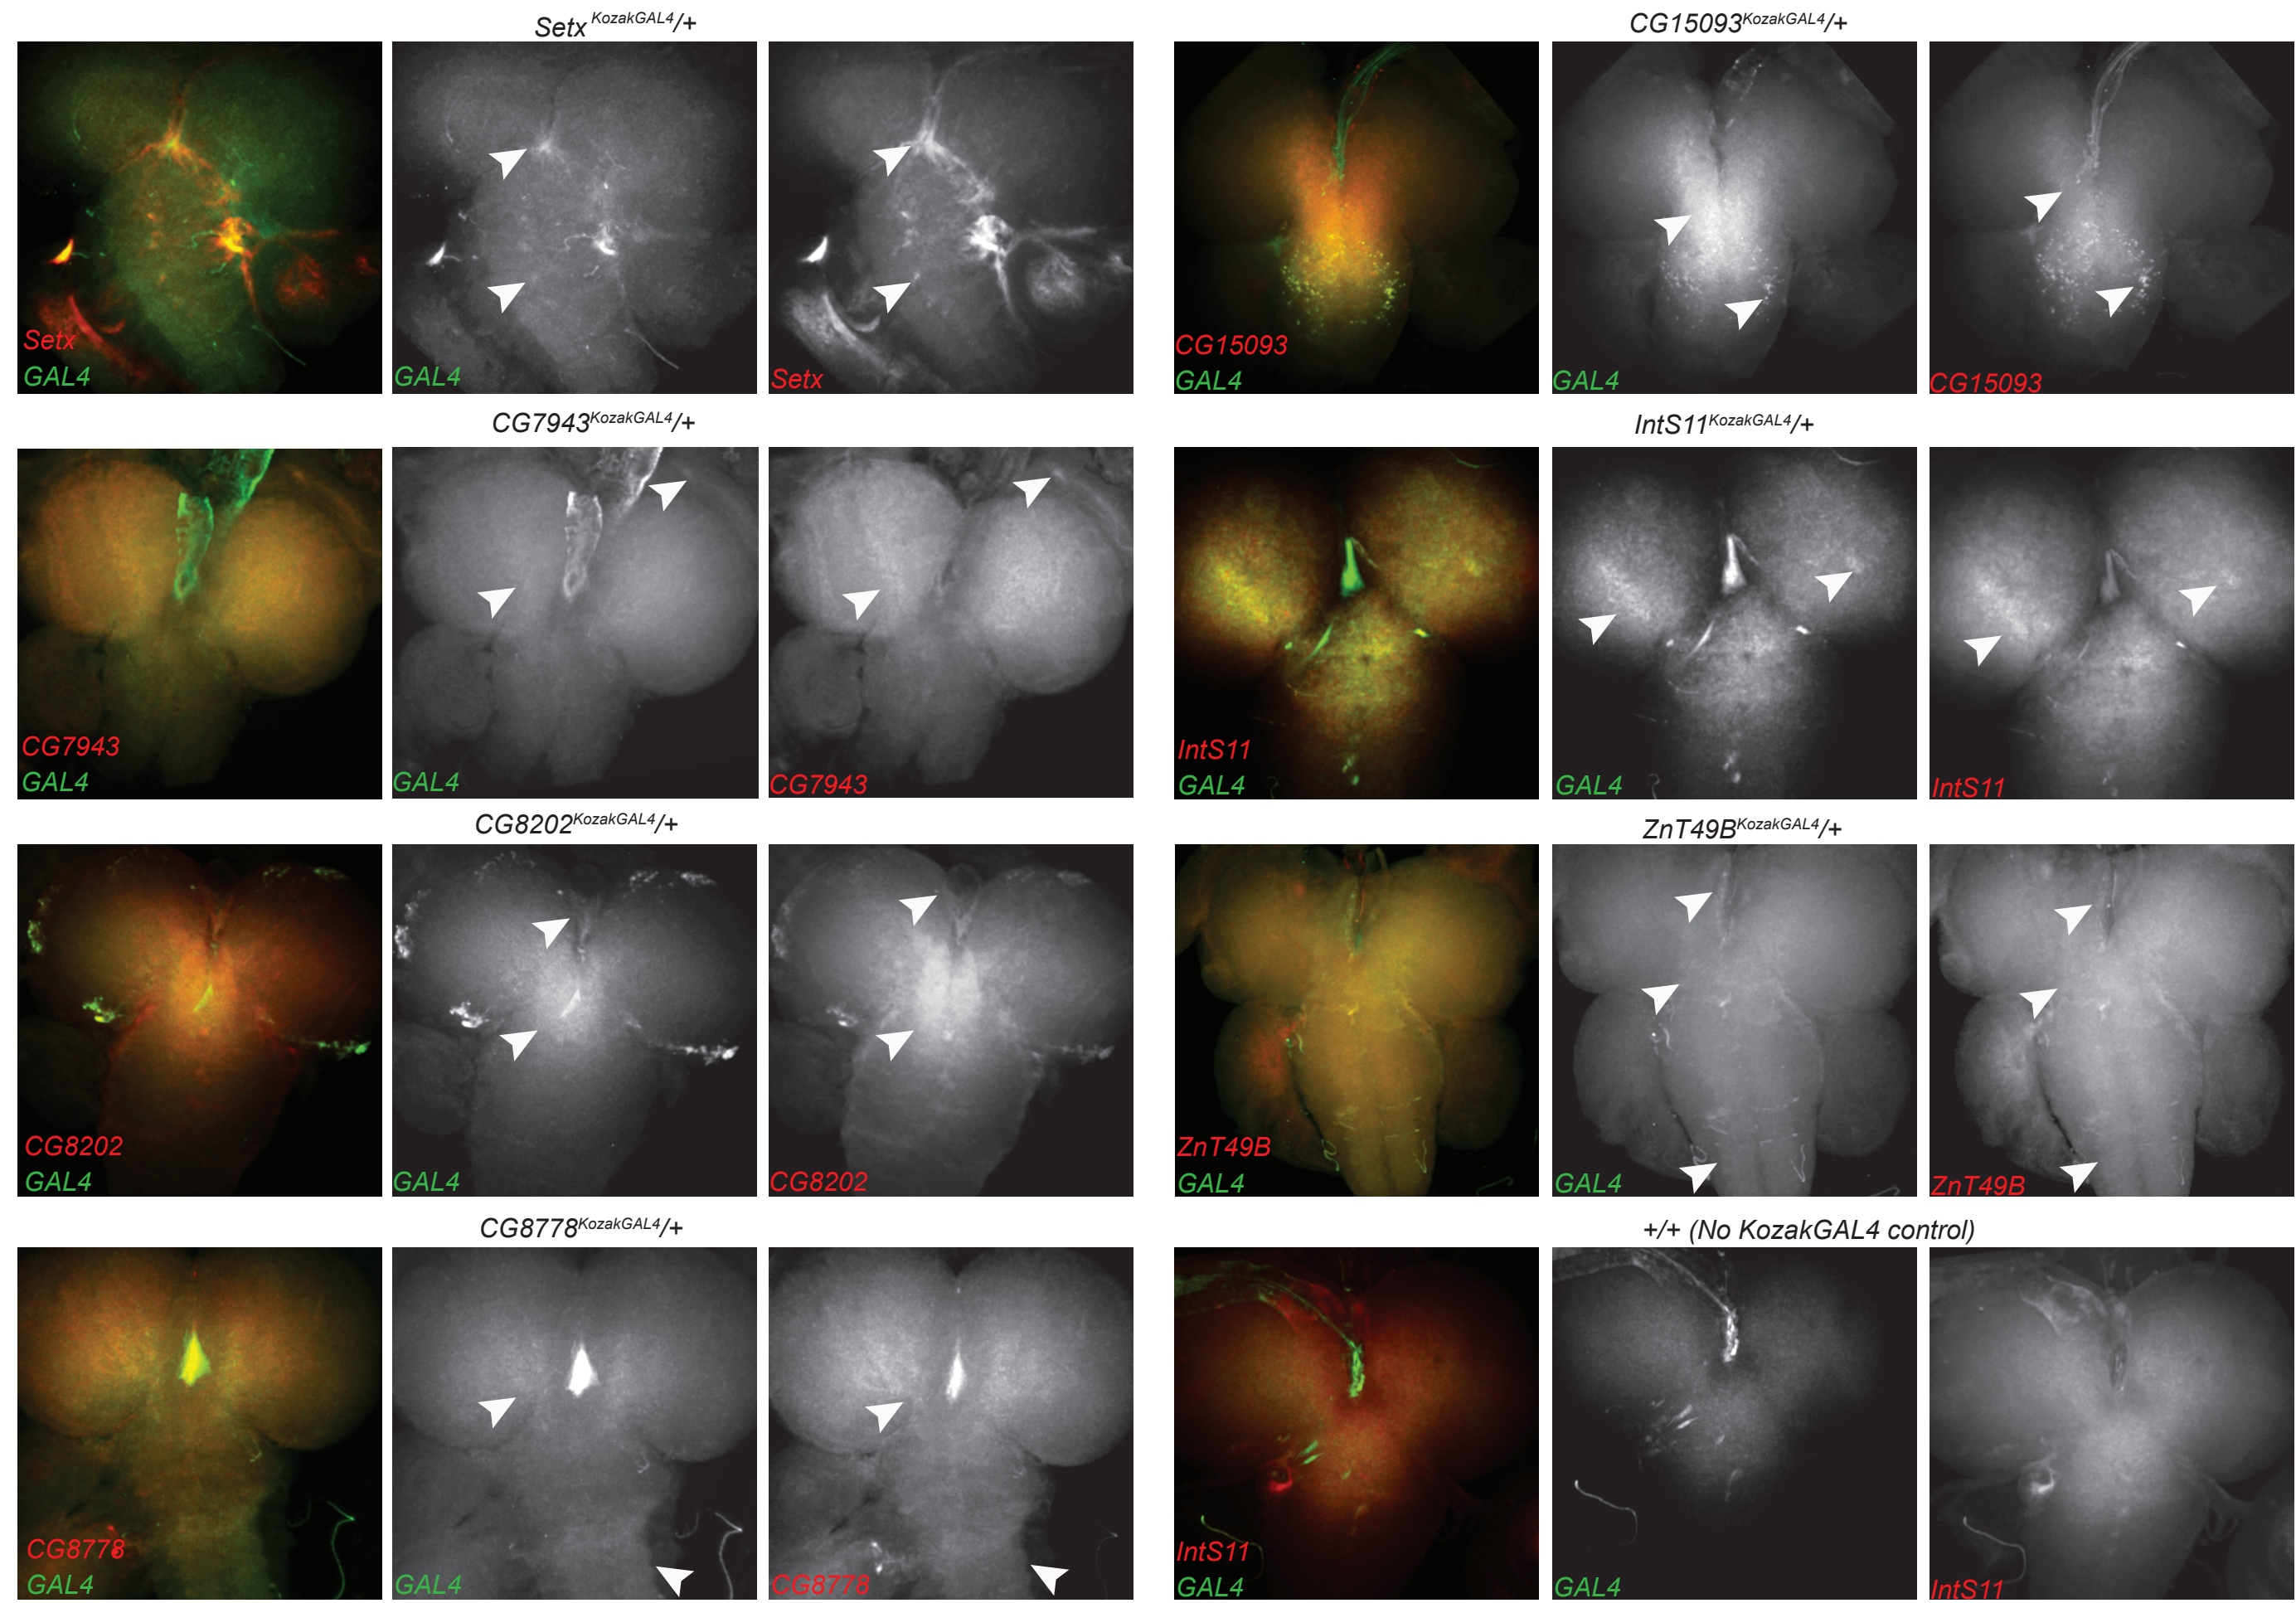

Supplement: supp [file elife_poa_e76077_Figure_2_figure_supplement_2.pdf › elife_poa_e76077_Figure_2_figure_supplement_2.pdf]

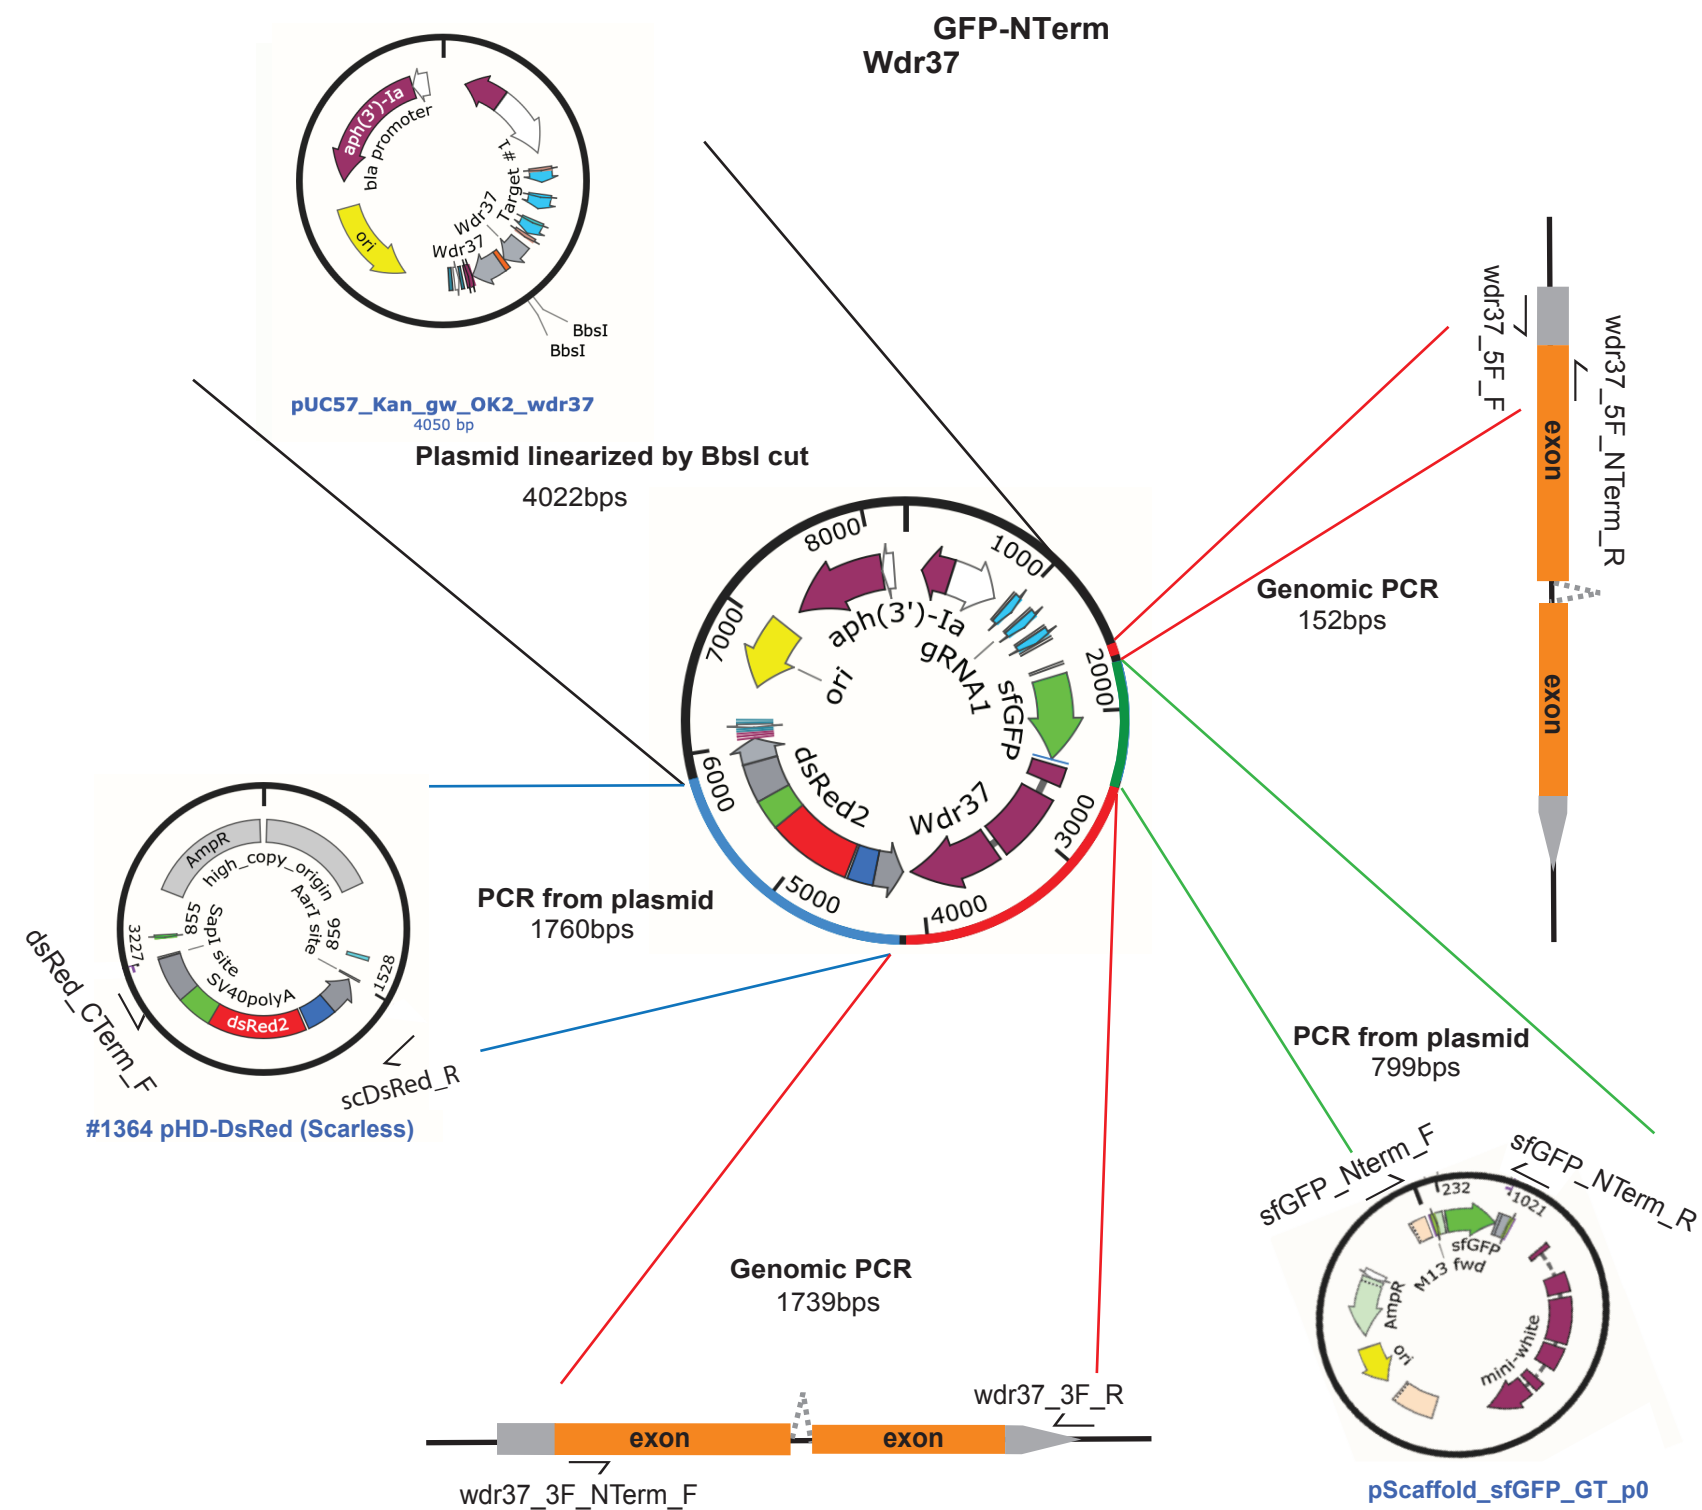

Supplement: supp [file elife_poa_e76077_Figure_5_figure_supplement_1.pdf › elife_poa_e76077_Figure_5_figure_supplement_1.pdf]

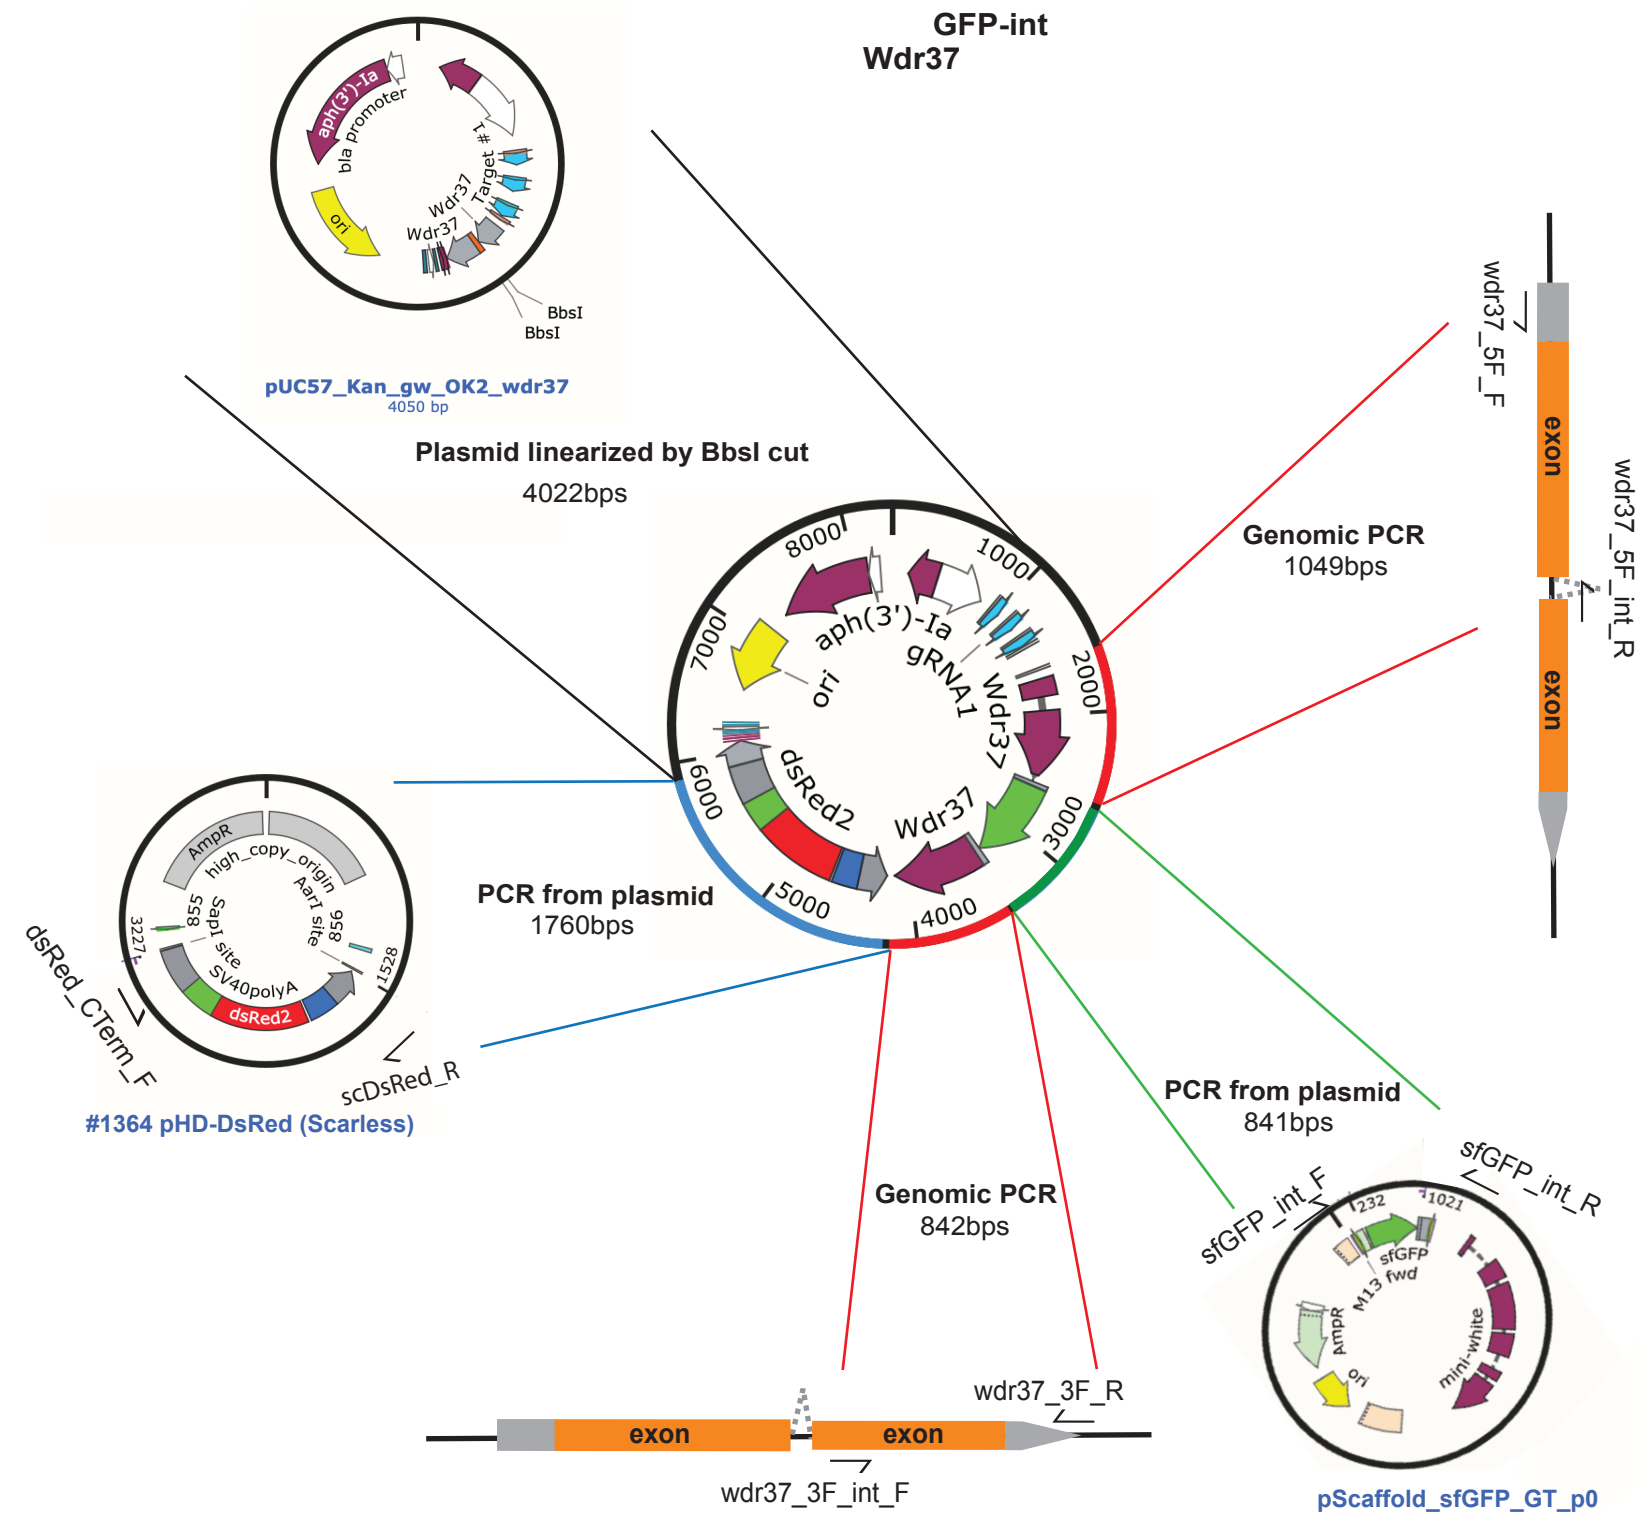

Supplement: supp [file elife_poa_e76077_Figure_5_figure_supplement_2.pdf › elife_poa_e76077_Figure_5_figure_supplement_2.pdf]

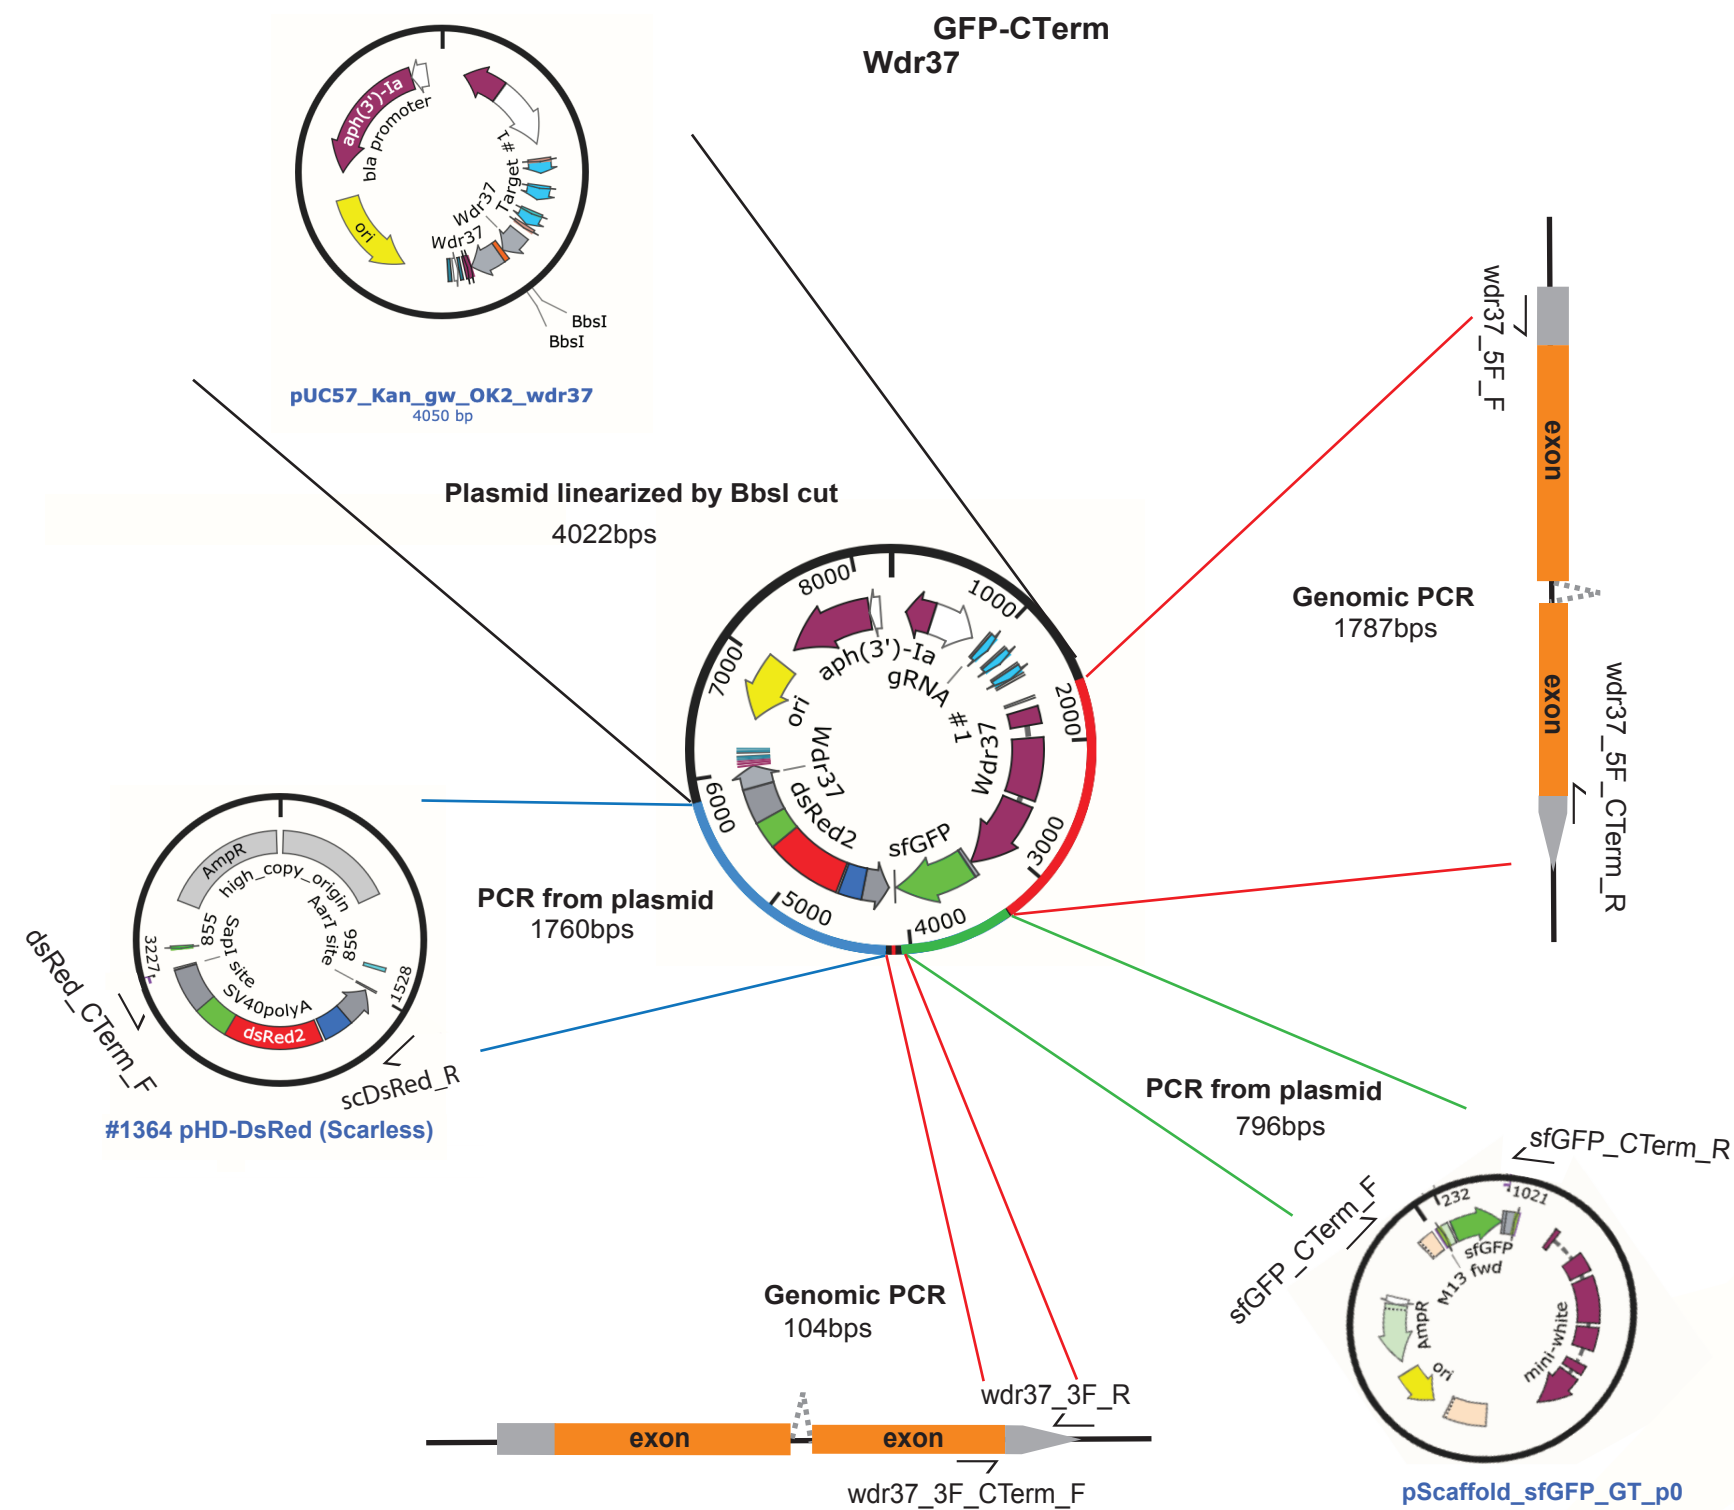

Supplement: supp [file elife_poa_e76077_Figure_5_figure_supplement_3.pdf › elife_poa_e76077_Figure_5_figure_supplement_3.pdf]
